# Supplementary material for: Synthesis of 2-pyrrolidinone derivativesviaN-heterocyclic carbene catalyzed radical tandem cyclization/coupling reactions
Source: Royal Society of Chemistry journal article supplement (doi:10.1039/d3qo00544e), 2023-01-01
Supplement: d3qo00544e1.pdf [file d3qo00544e1.pdf]

## Supporting Information

# Synthesis of 2-Pyrrolidinone Derivatives *via* N-Heterocyclic Carbene Catalyzed Radical Tandem Cyclization/Coupling Reaction

Huiping Yin, Tianjiao Huang, Bai Shi, Wei Cao, Chenxia Yu, Tuanjie Li, Kai Zhang\* and Changsheng Yao\*,

*Jiangsu Key Lab of Green Synthetic Chemistry for Functional Materials, School of Chemistry & Materials Science, Jiangsu Normal University, Xuzhou Jiangsu 221116, P. R. China*

*csyao@jsnu.edu.cn*

### Table of Contents

|                                              |    |
|----------------------------------------------|----|
| 1. General methods and materials .....       | 2  |
| 2. General procedures of substrates .....    | 2  |
| 3. General procedures of products .....      | 3  |
| 4. Radical trapping experiments .....        | 3  |
| 5. Characterization data of substrates ..... | 4  |
| 6. Characterization data of products .....   | 6  |
| 7. NMR spectrum.....                         | 16 |
| 8. References.....                           | 62 |

## 1. General methods and materials

Unless otherwise mentioned, all reactions were carried out under an atmosphere of argon in dry glassware and were monitored by analytical thin-layer chromatography (TLC), which was visualized by ultraviolet light (254 nm). All solvents were obtained from commercial sources and were purified according to standard procedures. All syntheses and manipulations were carried out under a dry argon atmosphere. Purification of the products was accomplished by flash chromatography using silica gel (200-300 mesh). Melting points were determined in open capillaries and were uncorrected. IR spectra were taken on a FT-IR spectrometer in KBr pellets and reported in  $\text{cm}^{-1}$ .  $^1\text{H}$  NMR spectra were measured on a 400 MHz spectrometer in  $\text{CDCl}_3$  (100 MHz,  $^{13}\text{C}$  NMR) or  $\text{DMSO}-d_6$  with chemical shift ( $\delta$ ) given in ppm relative to TMS as internal standard. Data were reported as follows: chemical shift, multiplicity (s = singlet, d = doublet, t = triplet, q = quartet, m = multiple), coupling constants (Hz), integration. High-resolution mass spectra (HRMS) were measured with ESI in a positive mode.

## 2. General procedures of substrates

### Preparation of 2<sup>1</sup>.

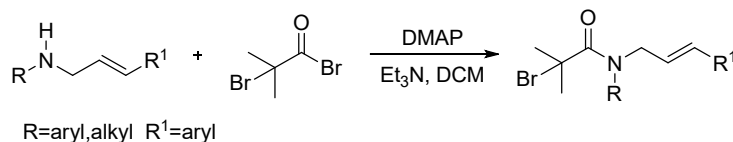

To a 100 mL flame-dried Schlenk tube charged with the corresponding cinnamyl amine<sup>2</sup> (5.0 mmol, 1.0 equiv.),  $\text{Et}_3\text{N}$  (1.40 mL, 10.0 mmol, 2.0 equiv.), DMAP (0.5 mmol, 0.1 equiv.) were suspended in DCM (20 mL), cooled to 0 °C, and then 2-bromo acid bromide (7.5 mmol, 1.5 equiv.) was added dropwise and stirred at room temperature for 12 hours. The reaction mixture was washed with  $\text{NH}_4\text{Cl}$  aqueous solution and brine, organic layer was dried with  $\text{Na}_2\text{SO}_4$ . The reaction mixture was concentrated under reduced pressure, and purified by column chromatography on silica gel (PE/EA=10/1) to give product **2**. All the substrates were prepared according to the above procedure.

### 3. General procedures of products

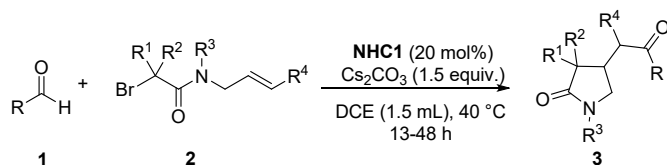

A dried and argon-filled Schlenk tube was charged with aldehydes **1** (0.20 mmol, 1.0 equiv.),  $\alpha$ -bromo-N-cinnamylamides **2** (0.30 mmol, 1.5 equiv.), NHC1 (0.04 mmol, 20 mol%), and Cs<sub>2</sub>CO<sub>3</sub> (0.30 mmol, 1.5 equiv.) in dry DCE (1.5 mL). The reaction mixture was stirred at 40 °C until the consumption of aldehydes **1** as monitored by TLC. The solvent was removed in vacuo and the residue was purified by chromatography on silica gel using PE/EA (15:1) as eluent to afford the desired products **3**.

### 4. Radical trapping experiments

#### 4.1 TEMPO trapping experiment

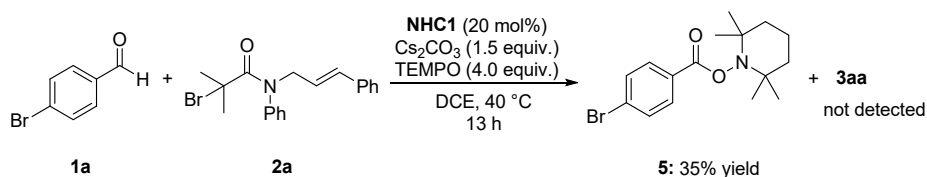

A dried and argon-filled Schlenk tube was charged with aldehydes **1a** (0.20 mmol, 1.0 equiv.),  $\alpha$ -bromo-N-cinnamylamides **2a** (0.30 mmol, 1.5 equiv.), thiazolium salt NHC1 (0.04 mmol, 20 mol%), Cs<sub>2</sub>CO<sub>3</sub> (0.30 mmol, 1.5 equiv.) and TEMPO (0.6 mmol, 3.0 equiv.) in dry DCE (1.5 mL). Then the system was stirred at 40 °C for 13 h. The reaction mixture was purified by silica gel column chromatography to afford the adduct **5** (23.8 mg, 35% yield). Instead, the 2-pyrrolidinone derivatives **3aa** was not formed.<sup>3</sup>

#### 4.2 PhSeSePh trapping experiment

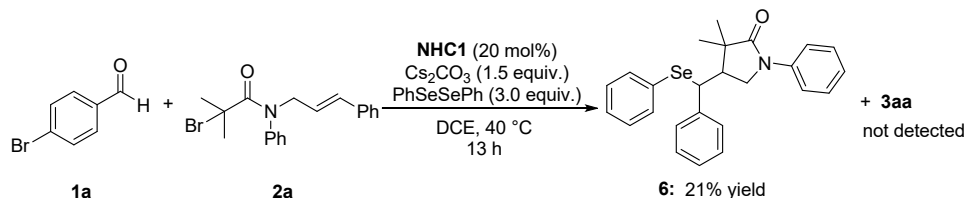

A dried and argon-filled Schlenk tube was charged with aldehydes **1a** (0.20 mmol, 1.0 equiv.),  $\alpha$ -bromo-N-cinnamylamides **2a** (0.30 mmol, 1.5 equiv.), thiazolium salt NHC1 (0.04 mmol, 20 mol%), Cs<sub>2</sub>CO<sub>3</sub> (0.30 mmol, 1.5 equiv.) and diphenyl diselenide (0.6 mmol, 3.0 equiv.)

in dry DCE (1.5 mL). Then the system was stirred at 40 °C for 13 h. The reaction mixture was purified by silica gel column chromatography to afford the corresponding trapping product **6** (18.5 mg, 21% yield). Instead, the desired product **3aa** was not formed.<sup>4</sup>

## 5. Characterization data of substrates

### (*E*)-2-bromo-2-methyl-*N*-phenyl-*N*-(3-(*p*-tolyl)allyl)propanamide (**2b**).

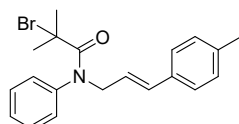

<sup>1</sup>H NMR (400 MHz, CDCl<sub>3</sub>) δ 7.40 – 7.32 (m, 5H), 7.23 (d, *J* = 7.7 Hz, 2H), 7.10 (d, *J* = 7.7 Hz, 2H), 6.38 – 6.15 (m, 2H), 4.41 (d, *J* = 5.6 Hz, 2H), 2.33 (s, 3H), 1.73 (s, 6H); <sup>13</sup>C NMR (100 MHz, CDCl<sub>3</sub>) δ 169.8, 142.3, 137.6, 133.9, 133.7, 129.9, 129.2, 128.9, 128.3, 126.4, 122.5, 58.3, 56.0, 33.3, 21.2; HRMS (ESI) *m/z* calcd for [M + H]<sup>+</sup> C<sub>20</sub>H<sub>23</sub>BrNO: 372.0958; found: 372.0953.

### (*E*)-2-bromo-*N*-(3-(4-methoxyphenyl)allyl)-2-methyl-*N*-phenylpropanamide (**2c**).

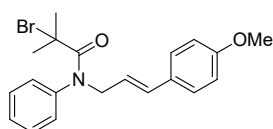

<sup>1</sup>H NMR (400 MHz, CDCl<sub>3</sub>) δ 7.41 – 7.33 (m, 5H), 7.27 (d, *J* = 8.7 Hz, 2H), 6.83 (d, *J* = 8.4 Hz, 2H), 6.29 (d, *J* = 15.9 Hz, 1H), 6.24 – 6.11 (m, 1H), 4.40 (d, *J* = 6.5 Hz, 2H), 3.79 (s, 3H), 1.73 (s, 6H); <sup>13</sup>C NMR (100 MHz, CDCl<sub>3</sub>) δ 169.8, 159.2, 142.3, 133.2, 129.9, 129.4, 128.9, 128.3, 127.6, 121.2, 113.9, 58.3, 56.1, 55.3, 33.3; HRMS (ESI) *m/z* calcd for [M + H]<sup>+</sup> C<sub>20</sub>H<sub>23</sub>BrNO<sub>2</sub>: 388.0907; found: 388.0911.

### (*E*)-2-bromo-*N*-(3-(4-chlorophenyl)allyl)-2-methyl-*N*-phenylpropanamide (**2d**).

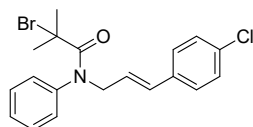

<sup>1</sup>H NMR (400 MHz, CDCl<sub>3</sub>) δ 7.43 – 7.30 (m, 5H), 7.25 (s, 4H), 6.38 – 6.22 (m, 2H), 4.41 (d, *J* = 4.4 Hz, 2H), 1.72 (s, 6H); <sup>13</sup>C NMR (100 MHz, CDCl<sub>3</sub>) δ 169.8, 142.2, 135.1, 133.2, 132.3, 129.8, 128.9, 128.6, 128.3, 127.6, 124.2, 58.2, 55.8, 33.2; HRMS (ESI) *m/z* calcd for [M + H]<sup>+</sup> C<sub>19</sub>H<sub>20</sub>BrClNO: 392.0411; found: 392.0407.

### (*E*)-2-bromo-*N*-(3-(4-bromophenyl)allyl)-2-methyl-*N*-phenylpropanamide (**2e**).

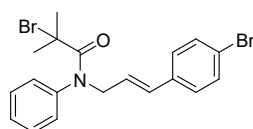

<sup>1</sup>H NMR (400 MHz, CDCl<sub>3</sub>) δ 7.46 – 7.30 (m, 7H), 7.20 (d, *J* = 8.1 Hz, 2H), 6.38 – 6.19 (m, 2H), 4.40 (d, *J* = 3.8 Hz, 2H), 1.72 (s, 6H); <sup>13</sup>C NMR (100 MHz, CDCl<sub>3</sub>) δ 169.9, 142.3, 135.6, 132.5, 131.6, 129.9, 129.0, 128.4, 128.0, 124.4, 121.5, 58.2, 55.9, 33.3; HRMS (ESI) *m/z* calcd for [M + H]<sup>+</sup> C<sub>19</sub>H<sub>20</sub>Br<sub>2</sub>NO: 435.9906.; found: 435.9904.

### (*E*)-2-bromo-*N*-(3-(4-fluorophenyl)allyl)-2-methyl-*N*-phenylpropanamide (**2f**).

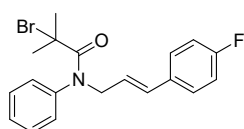

<sup>1</sup>H NMR (400 MHz, CDCl<sub>3</sub>) δ 7.42 – 7.33 (m, 5H), 7.33 – 7.27 (m, 2H), 6.98 (t, *J* = 8.6 Hz, 2H), 6.33 (d, *J* = 15.9 Hz, 1H), 6.27 – 6.18 (m, 1H),

4.40 (d,  $J = 6.4$  Hz, 2H), 1.73 (s, 6H);  $^{13}\text{C}$  NMR (100 MHz,  $\text{CDCl}_3$ )  $\delta$  169.8, 162.3 (d,  $J_{\text{C-F}} = 245.6$  Hz), 142.3, 132.8 (d,  $J_{\text{C-F}} = 3.2$  Hz), 129.9, 129.0, 128.4, 128.0 (d,  $J_{\text{C-F}} = 7.9$  Hz), 123.3, 123.2, 115.4 (d,  $J_{\text{C-F}} = 21.5$  Hz), 58.2, 55.9, 33.3;  $^{19}\text{F}$  NMR (376 MHz,  $\text{CDCl}_3$ )  $\delta$  -114.22; HRMS (ESI)  $m/z$  calcd for  $[\text{M} + \text{H}]^+$   $\text{C}_{19}\text{H}_{20}\text{BrFNO}$ : 376.0707; found: 376.0704.

**(E)-2-bromo-N-(3-(3-chlorophenyl)allyl)-2-methyl-N-phenylpropanamide (2g).**

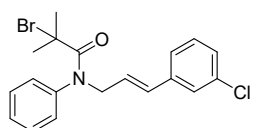

$^1\text{H}$  NMR (400 MHz,  $\text{CDCl}_3$ )  $\delta$  7.42 – 7.33 (m, 5H), 7.32 (s, 1H), 7.25 – 7.17 (m, 3H), 6.37 – 6.27 (m, 2H), 4.41 (d,  $J = 4.4$  Hz, 2H), 1.73 (s, 6H);  $^{13}\text{C}$  NMR (100 MHz,  $\text{CDCl}_3$ )  $\delta$  169.9, 142.3, 138.5, 134.5, 132.3, 129.8,

129.7, 129.0, 128.4, 127.6, 126.4, 125.2, 124.7, 58.2, 55.8, 33.3; HRMS (ESI)  $m/z$  calcd for  $[\text{M} + \text{H}]^+$   $\text{C}_{19}\text{H}_{20}\text{BrClNO}$ : 392.0411; found: 392.0419.

**(E)-2-bromo-N-(3-(2-chlorophenyl)allyl)-2-methyl-N-phenylpropanamide (2h).**

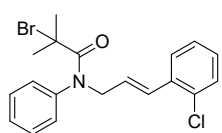

$^1\text{H}$  NMR (400 MHz,  $\text{CDCl}_3$ )  $\delta$  7.52 (d,  $J = 7.5$  Hz, 1H), 7.46 – 7.34 (m, 5H), 7.32 (d,  $J = 7.7$  Hz, 1H), 7.24 – 7.14 (m, 2H), 6.74 (d,  $J = 15.9$  Hz, 1H), 6.35 – 6.24 (m, 1H), 4.46 (d,  $J = 6.4$  Hz, 2H), 1.74 (s, 6H);  $^{13}\text{C}$  NMR (100 MHz,

$\text{CDCl}_3$ )  $\delta$  169.9, 142.4, 134.9, 133.0, 129.8, 129.7, 129.6, 129.0, 128.7, 128.4, 127.1, 126.8, 126.6, 58.1, 55.9, 33.3; HRMS (ESI)  $m/z$  calcd for  $[\text{M} + \text{H}]^+$   $\text{C}_{19}\text{H}_{20}\text{BrClNO}$ : 392.0411; found: 392.0413.

**2-bromo-N-cinnamyl-N-(4-methoxyphenyl)-2-methylpropanamide (2i).**

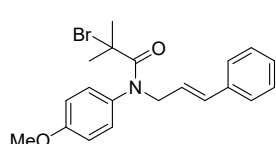

$^1\text{H}$  NMR (400 MHz,  $\text{CDCl}_3$ )  $\delta$  7.35 (d,  $J = 7.4$  Hz, 2H), 7.30 (t,  $J = 7.6$  Hz, 2H), 7.27 (d,  $J = 6.1$  Hz, 1H), 7.26 – 7.21 (m, 2H), 6.88 (d,  $J = 8.7$  Hz, 2H), 6.39 – 6.26 (m, 2H), 4.39 (s, 2H), 3.82 (s, 3H), 1.73 (s, 6H);

$^{13}\text{C}$  NMR (100 MHz,  $\text{CDCl}_3$ )  $\delta$  170.1, 159.1, 136.7, 134.9, 133.6, 131.0, 128.5, 127.6, 126.4, 123.6, 113.9, 58.3, 56.1, 55.4, 33.4; HRMS (ESI)  $m/z$  calcd for  $[\text{M} + \text{H}]^+$   $\text{C}_{20}\text{H}_{23}\text{BrNO}_2$ : 388.0907; found: 388.0906.

**2-bromo-N-(4-chlorophenyl)-N-cinnamyl-2-methylpropanamide (2j).**

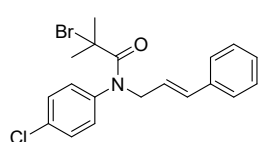

$^1\text{H}$  NMR (400 MHz,  $\text{CDCl}_3$ )  $\delta$  7.36 (t,  $J = 8.4$  Hz, 3H), 7.31 (t,  $J = 8.1$  Hz, 5H), 7.24 (s, 1H), 6.41 – 6.20 (m, 2H), 4.41 (d,  $J = 5.9$  Hz, 2H), 1.76 (s, 6H);  $^{13}\text{C}$  NMR (100 MHz,  $\text{CDCl}_3$ )  $\delta$  169.8, 140.8, 136.5, 134.2, 134.1,

131.3, 129.2, 128.6, 127.8, 126.5, 123.2, 57.9, 56.0, 33.3; HRMS (ESI)  $m/z$  calcd for  $[\text{M} + \text{H}]^+$   $\text{C}_{19}\text{H}_{20}\text{BrClNO}$ : 392.0411; found: 392.0411.

**N-benzyl-2-bromo-N-cinnamyl-2-methylpropanamide (2k).**

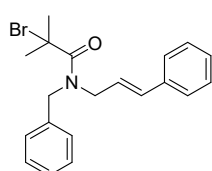

$^1\text{H}$  NMR (400 MHz,  $\text{CDCl}_3$ )  $\delta$  7.40 – 7.30 (m, 6H), 7.30 – 7.21 (m, 4H), 6.44 (s, 1H), 6.24 – 6.05 (m, 1H), 5.16 – 3.95 (m, 4H), 2.03 (s, 6H);  $^{13}\text{C}$  NMR

(100 MHz, CDCl<sub>3</sub>)  $\delta$  170.6, 136.9, 136.3, 133.1, 128.7, 128.6, 127.8, 127.3, 126.4, 124.0, 57.1, 50.4, 48.9, 32.9; **HRMS** (ESI)  $m/z$  calcd for [M + H]<sup>+</sup> C<sub>20</sub>H<sub>23</sub>BrNO: 372.0958; found: 372.0962.

#### 2-bromo-*N*-cinnamyl-2-methyl-*N*-tosylpropanamide (2l).

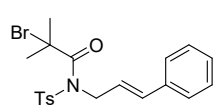

<sup>1</sup>H NMR (400 MHz, CDCl<sub>3</sub>)  $\delta$  7.88 (d,  $J$  = 8.0 Hz, 2H), 7.39 – 7.31 (m, 4H), 7.31 – 7.27 (m, 1H), 7.26 – 7.22 (m, 2H), 6.70 (d,  $J$  = 16.0 Hz, 1H), 6.29 – 6.21 (m, 1H), 5.10 (d,  $J$  = 5.5 Hz, 2H), 2.40 (s, 3H), 1.94 (s, 6H); <sup>13</sup>C NMR (100 MHz, CDCl<sub>3</sub>)  $\delta$  170.6, 144.6, 136.2, 136.0, 133.6, 129.2, 129.1, 128.6, 128.1, 126.5, 124.4, 56.9, 50.4, 32.0, 21.6; **HRMS** (ESI)  $m/z$  calcd for [M + Na]<sup>+</sup> C<sub>20</sub>H<sub>22</sub>BrNNaO<sub>3</sub>S: 458.0396; found: 458.0399.

#### 2-bromo-*N*-cinnamyl-*N*-phenylpropanamide (2m).

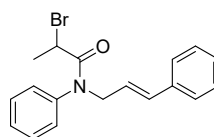

<sup>1</sup>H NMR (400 MHz, CDCl<sub>3</sub>)  $\delta$  7.46 – 7.37 (m, 3H), 7.33 (t,  $J$  = 7.8 Hz, 3H), 7.29 (d,  $J$  = 7.5 Hz, 2H), 7.26 – 7.20 (m, 2H), 6.40 (d,  $J$  = 15.8 Hz, 1H), 6.32 – 6.19 (m, 1H), 4.51 – 4.37 (m, 2H), 4.23 (q,  $J$  = 6.6 Hz, 1H), 1.76 (d,  $J$  = 6.6 Hz, 3H); <sup>13</sup>C NMR (100 MHz, CDCl<sub>3</sub>)  $\delta$  169.3, 141.2, 136.6, 133.9, 129.8, 128.6, 128.5, 128.3, 127.8, 126.5, 123.4, 52.4, 39.4, 21.7; **HRMS** (ESI)  $m/z$  calcd for [M + H]<sup>+</sup> C<sub>18</sub>H<sub>19</sub>BrNO: 344.0645; found: 344.0644.

## 6. Characterization data of products

#### 4-(2-(4-bromophenyl)-2-oxo-1-phenylethyl)-3,3-dimethyl-1-phenylpyrrolidin-2-one (3aa).

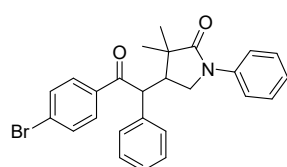

White solid (73.8 mg, 80% yield); **mp** 180.3 – 181.6 °C; <sup>1</sup>H NMR (400 MHz, CDCl<sub>3</sub>)  $\delta$  7.89 (d,  $J$  = 8.1 Hz, 2H), 7.66 – 7.54 (m, 4H), 7.43 (d,  $J$  = 7.6 Hz, 2H), 7.34 (t,  $J$  = 7.5 Hz, 4H), 7.27 (d,  $J$  = 9.1 Hz, 1H), 7.12 (t,  $J$  = 7.4 Hz, 1H), 4.74 (d,  $J$  = 10.7 Hz, 1H), 4.04 (t,  $J$  = 8.4 Hz, 1H), 3.37 (t,  $J$  = 9.8 Hz, 1H), 3.28 – 3.18 (m, 1H), 1.23 (s, 3H), 0.66 (s, 3H); <sup>13</sup>C NMR (100 MHz, CDCl<sub>3</sub>)  $\delta$  196.8, 178.3, 139.3, 135.9, 134.8, 132.0, 130.1, 129.2, 128.7, 128.1, 124.4, 119.7, 53.2, 49.8, 45.7, 44.5, 24.3, 18.9; **IR** (KBr) ( $\nu$ , cm<sup>-1</sup>): 3059, 2977, 1698, 1586, 1567, 1494, 1454, 1396; **HRMS** (ESI)  $m/z$  calcd for [M + H]<sup>+</sup> C<sub>26</sub>H<sub>25</sub>BrNO<sub>2</sub>: 462.1063; found: 462.1055.

#### 4-(2-(4-chlorophenyl)-2-oxo-1-phenylethyl)-3,3-dimethyl-1-phenylpyrrolidin-2-one (3ba).

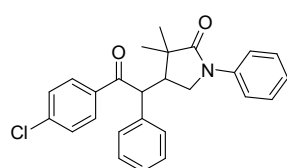

White solid (54.5 mg, 65% yield); **mp** 186.8 – 187.4 °C; <sup>1</sup>H NMR (400 MHz, CDCl<sub>3</sub>)  $\delta$  7.97 (d,  $J$  = 8.6 Hz, 2H), 7.61 (d,  $J$  = 8.1 Hz, 2H), 7.46 – 7.37 (m, 4H), 7.37 – 7.30 (m, 4H), 7.28 – 7.22 (m, 1H), 7.11 (t,  $J$  = 7.4 Hz, 1H), 4.75 (d,  $J$  = 10.8 Hz, 1H), 4.09 – 3.98 (m, 1H), 3.37 (t,

$J = 9.8$  Hz, 1H), 3.28 – 3.17 (m, 1H), 1.23 (s, 3H), 0.66 (s, 3H);  $^{13}\text{C}$  NMR (100 MHz,  $\text{CDCl}_3$ )  $\delta$  196.6, 178.4, 139.9, 139.3, 135.9, 134.4, 130.1, 129.2, 129.0, 128.7, 128.1, 124.4, 119.7, 53.2, 49.8, 45.8, 44.6, 24.3, 18.9; IR (KBr) ( $\nu$ ,  $\text{cm}^{-1}$ ): 3063, 2980, 1702, 1669, 1589, 1570, 1494, 1455, 1395; HRMS (ESI)  $m/z$  calcd for  $[\text{M} + \text{H}]^+ \text{C}_{26}\text{H}_{25}\text{ClNO}_2$ : 418.1568; found: 418.1563.

#### 4-(2-(4-fluorophenyl)-2-oxo-1-phenylethyl)-3,3-dimethyl-1-phenylpyrrolidin-2-one (3ca).

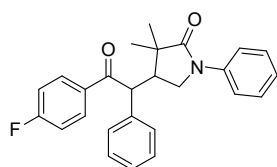

White solid (70.5 mg, 88% yield); mp 187.2 – 187.7 °C;  $^1\text{H}$  NMR (400 MHz,  $\text{CDCl}_3$ )  $\delta$  8.10 – 8.03 (m, 2H), 7.61 (d,  $J = 8.1$  Hz, 2H), 7.45 (d,  $J = 8.1$  Hz, 2H), 7.33 (q,  $J = 7.3$  Hz, 4H), 7.27 (d,  $J = 7.6$  Hz, 1H), 7.14 – 7.06 (m, 3H), 4.77 (d,  $J = 10.8$  Hz, 1H), 4.08 – 4.00 (m, 1H), 3.38 (t,  $J = 9.8$  Hz, 1H), 3.29 – 3.16 (m, 1H), 1.23 (s, 3H), 0.66 (s, 3H);  $^{13}\text{C}$  NMR (100 MHz,  $\text{CDCl}_3$ )  $\delta$  196.3, 178.4, 165.8 (d,  $J_{\text{C-F}} = 254.7$  Hz), 139.3, 136.1, 132.5 (d,  $J_{\text{C-F}} = 2.8$  Hz), 131.3 (d,  $J_{\text{C-F}} = 9.3$  Hz), 129.1, 128.7, 128.0, 124.4, 119.7, 115.9 (d,  $J_{\text{C-F}} = 21.8$  Hz), 53.1, 49.8, 45.8, 44.6, 24.3, 18.9;  $^{19}\text{F}$  NMR (376 MHz,  $\text{CDCl}_3$ )  $\delta$  -104.15; IR (KBr) ( $\nu$ ,  $\text{cm}^{-1}$ ): 3042, 2971, 1703, 1668, 1596, 1494, 1485, 1456, 1393; HRMS (ESI)  $m/z$  calcd for  $[\text{M} + \text{H}]^+ \text{C}_{26}\text{H}_{25}\text{FNO}_2$ : 402.1864; found: 402.1861.

#### 3,3-dimethyl-4-(2-oxo-1-phenyl-2-(4-(trifluoromethyl)phenyl)ethyl)-1-phenylpyrrolidin-2-one (3da).

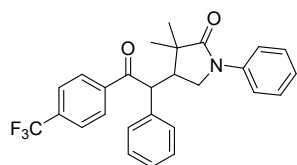

White solid (41.5 mg, 46% yield); mp 101.4 – 102.8 °C;  $^1\text{H}$  NMR (400 MHz,  $\text{CDCl}_3$ )  $\delta$  8.12 (d,  $J = 8.1$  Hz, 2H), 7.70 (d,  $J = 8.1$  Hz, 2H), 7.61 (d,  $J = 8.1$  Hz, 2H), 7.44 (d,  $J = 8.2$  Hz, 2H), 7.35 (q,  $J = 7.1$  Hz, 4H), 7.29 (d,  $J = 7.2$  Hz, 1H), 7.13 (t,  $J = 7.4$  Hz, 1H), 4.79 (d,  $J = 10.7$  Hz, 1H), 4.06 (t,  $J = 8.4$  Hz, 1H), 3.39 (t,  $J = 9.8$  Hz, 1H), 3.29 – 3.19 (m, 1H), 1.24 (s, 3H), 0.67 (s, 3H);  $^{13}\text{C}$  NMR (100 MHz,  $\text{CDCl}_3$ )  $\delta$  196.9, 178.3, 139.3, 138.8, 135.5, 134.6 (q,  $J_{\text{C-F}} = 32.6$  Hz), 129.3, 129.2, 129.0, 128.8, 128.3, 125.8 (q,  $J_{\text{C-F}} = 3.6$  Hz), 124.5, 123.4 (d,  $J_{\text{C-F}} = 280$  Hz), 119.7, 53.7, 49.8, 45.8, 44.6, 24.3, 18.9;  $^{19}\text{F}$  NMR (376 MHz,  $\text{CDCl}_3$ )  $\delta$  -63.20; IR (KBr) ( $\nu$ ,  $\text{cm}^{-1}$ ): 3060, 2970, 1686, 1598, 1500, 1458, 1403; HRMS (ESI)  $m/z$  calcd for  $[\text{M} + \text{H}]^+ \text{C}_{27}\text{H}_{25}\text{F}_3\text{NO}_2$ : 452.1832; found: 452.1825.

#### 3,3-dimethyl-4-(2-oxo-1,2-diphenylethyl)-1-phenylpyrrolidin-2-one (3ea).

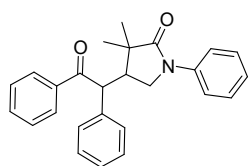

White solid (62.7 mg, 82% yield); mp 202.8 – 203.2 °C;  $^1\text{H}$  NMR (400 MHz,  $\text{CDCl}_3$ )  $\delta$  8.04 (d,  $J = 7.6$  Hz, 2H), 7.61 (d,  $J = 7.9$  Hz, 2H), 7.54 (t,  $J = 7.4$  Hz, 1H), 7.45 (q,  $J = 7.5, 7.0$  Hz, 4H), 7.37 – 7.30 (m, 4H), 7.28 – 7.25 (m, 1H), 7.11 (t,  $J = 7.4$  Hz, 1H), 4.83 (d,  $J = 10.8$  Hz, 1H), 4.12 – 3.98 (m, 1H), 3.39 (t,  $J = 9.8$  Hz, 1H), 3.32 – 3.20 (m, 1H), 1.24 (s, 3H), 0.67 (s, 3H);  $^{13}\text{C}$  NMR

(100 MHz, CDCl<sub>3</sub>)  $\delta$  197.9, 178.5, 139.4, 136.2, 133.4, 129.3, 129.1, 128.7(5), 128.6(7), 127.9, 124.4, 119.7, 53.1, 49.9, 45.9, 44.6, 24.4, 18.9; **IR** (KBr) ( $\nu$ , cm<sup>-1</sup>): 3064, 2964, 1699, 1683, 1668, 1596, 1500, 1484, 1456, 1394; **HRMS** (ESI)  $m/z$  calcd for [M + H]<sup>+</sup> C<sub>26</sub>H<sub>26</sub>NO<sub>2</sub>: 384.1958; found: 384.1951.

**3,3-dimethyl-4-(2-oxo-1-phenyl-2-(*p*-tolyl)ethyl)-1-phenylpyrrolidin-2-one (3fa).**

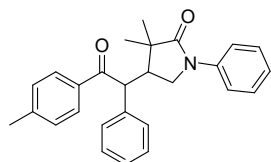

White solid (74.6 mg, 94% yield); **mp** 200.5 – 201.1 °C; **<sup>1</sup>H NMR** (400 MHz, CDCl<sub>3</sub>)  $\delta$  7.95 (d,  $J$  = 7.9 Hz, 2H), 7.61 (d,  $J$  = 8.1 Hz, 2H), 7.46 (d,  $J$  = 7.6 Hz, 2H), 7.32 (t,  $J$  = 7.7 Hz, 4H), 7.26 – 7.22 (m, 3H), 7.11 (t,  $J$  = 7.4 Hz, 1H), 4.80 (d,  $J$  = 10.8 Hz, 1H), 4.03 (t, 1H), 3.37 (t,  $J$  = 9.8 Hz, 1H), 3.32 – 3.17 (m, 1H), 2.38 (s, 3H), 1.23 (s, 3H), 0.67 (s, 3H); **<sup>13</sup>C NMR** (100 MHz, CDCl<sub>3</sub>)  $\delta$  197.5, 178.5, 144.4, 139.4, 136.5, 133.7, 129.4, 129.2, 129.0, 128.8, 128.7, 127.8, 124.3, 119.7, 52.9, 49.9, 45.9, 44.6, 24.4, 21.6, 18.9; **IR** (KBr) ( $\nu$ , cm<sup>-1</sup>): 3033, 2979, 1698, 1666, 1604, 1494, 1485, 1456, 1394; **HRMS** (ESI)  $m/z$  calcd for [M + H]<sup>+</sup> C<sub>27</sub>H<sub>28</sub>NO<sub>2</sub>: 398.2115; found: 398.2114.

**4-(2-(4-methoxyphenyl)-2-oxo-1-phenylethyl)-3,3-dimethyl-1-phenylpyrrolidin-2-one (3ga).**

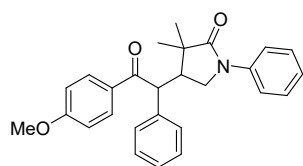

White solid (56.2 mg, 68% yield); **mp** 222.3 – 222.8 °C ; **<sup>1</sup>H NMR** (400 MHz, CDCl<sub>3</sub>)  $\delta$  8.04 (d,  $J$  = 8.5 Hz, 2H), 7.61 (d,  $J$  = 8.1 Hz, 2H), 7.47 (d,  $J$  = 7.6 Hz, 2H), 7.32 (t,  $J$  = 7.6 Hz, 4H), 7.23 (t,  $J$  = 7.4 Hz, 1H), 7.10 (t,  $J$  = 7.4 Hz, 1H), 6.91 (d,  $J$  = 8.4 Hz, 2H), 4.78 (d,  $J$  = 10.8 Hz, 1H), 4.03 (t,  $J$  = 8.4 Hz, 1H), 3.84 (s, 3H), 3.37 (t,  $J$  = 9.8 Hz, 1H), 3.31 – 3.18 (m, 1H), 1.23 (s, 3H), 0.67 (s, 3H); **<sup>13</sup>C NMR** (100 MHz, CDCl<sub>3</sub>)  $\delta$  196.4, 178.6, 163.8, 139.4, 136.7, 131.0, 129.1(2), 129.0(7), 128.9(8), 128.7, 127.8, 124.3, 119.7, 113.9, 55.5, 52.6, 49.9, 45.8, 44.6, 24.4, 18.9; **IR** (KBr) ( $\nu$ , cm<sup>-1</sup>): 3011, 2973, 1696, 1665, 1599, 1575, 1512, 1494, 1455, 1395; **HRMS** (ESI)  $m/z$  calcd for [M + H]<sup>+</sup> C<sub>27</sub>H<sub>28</sub>NO<sub>3</sub>: 414.2064; found: 414.2070.

**4-(2-(3-bromophenyl)-2-oxo-1-phenylethyl)-3,3-dimethyl-1-phenylpyrrolidin-2-one (3ha).**

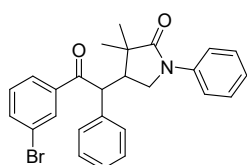

White solid (36.9 mg, 40% yield); **mp** 161.9 – 162.5 °C; **<sup>1</sup>H NMR** (400 MHz, CDCl<sub>3</sub>)  $\delta$  8.14 (s, 1H), 7.95 (d,  $J$  = 7.8 Hz, 1H), 7.65 (d,  $J$  = 8.0 Hz, 1H), 7.61 (d,  $J$  = 8.1 Hz, 2H), 7.43 (d,  $J$  = 7.5 Hz, 2H), 7.38 – 7.31 (m, 4H), 7.31 – 7.26 (m, 2H), 7.12 (t,  $J$  = 7.4 Hz, 1H), 4.74 (d,  $J$  = 10.8 Hz, 1H), 4.03 (t,  $J$  = 8.4 Hz, 1H), 3.38 (t,  $J$  = 9.8 Hz, 1H), 3.30 – 3.17 (m, 1H), 1.23 (s, 3H), 0.66 (s, 3H); **<sup>13</sup>C NMR** (100 MHz, CDCl<sub>3</sub>)  $\delta$  196.5, 178.3, 139.3, 137.8, 136.2, 135.7, 131.7, 130.3, 129.2(3), 129.1(9), 128.8, 128.1, 127.1, 124.4, 123.2, 119.7, 53.4, 49.8, 45.8, 44.6, 24.3, 18.9; **IR**



(KBr) ( $\nu$ ,  $\text{cm}^{-1}$ ): 3060, 2970, 1685, 1674, 1598, 1566, 1493, 1468, 1403; **HRMS** (ESI)  $m/z$  calcd for  $[\text{M} + \text{H}]^+ \text{C}_{26}\text{H}_{25}\text{BrNO}_2$ : 462.1063; found: 462.1065.

#### 4-(2-(3-chlorophenyl)-2-oxo-1-phenylethyl)-3,3-dimethyl-1-phenylpyrrolidin-2-one (3ia).

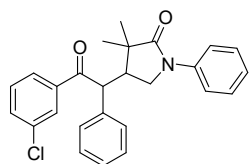

White solid (35.2 mg, 42% yield); **mp** 173.2 – 174.6 °C;  **$^1\text{H}$  NMR** (400 MHz,  $\text{CDCl}_3$ )  $\delta$  7.98 (s, 1H), 7.91 (d,  $J = 7.8$  Hz, 1H), 7.61 (d,  $J = 8.6$  Hz, 2H), 7.50 (d,  $J = 8.1$  Hz, 1H), 7.44 (d,  $J = 7.7$  Hz, 2H), 7.39 (d,  $J = 7.8$  Hz, 1H), 7.37 – 7.31 (m, 4H), 7.28 (d,  $J = 7.2$  Hz, 1H), 7.12 (t,  $J = 7.4$  Hz, 1H), 4.75 (d,  $J = 10.7$  Hz, 1H), 4.07 – 3.98 (m, 1H), 3.38 (t,  $J = 9.8$  Hz, 1H), 3.28 – 3.18 (m, 1H), 1.24 (s, 3H), 0.66 (s, 3H);  **$^{13}\text{C}$  NMR** (100 MHz,  $\text{CDCl}_3$ )  $\delta$  196.6, 178.3, 139.3, 137.7, 135.7, 135.1, 133.3, 130.0, 129.2(2), 129.2(0), 128.7, 128.1, 126.7, 124.4, 119.7, 53.4, 49.8, 45.8, 44.6, 24.3, 18.9; **IR** (KBr) ( $\nu$ ,  $\text{cm}^{-1}$ ): 3064, 2965, 1705, 1671, 1597, 1573, 1486, 1460, 1394; **HRMS** (ESI)  $m/z$  calcd for  $[\text{M} + \text{H}]^+ \text{C}_{26}\text{H}_{25}\text{ClNO}_2$ : 418.1568; found: 418.1561.

#### 3,3-dimethyl-4-(2-oxo-1-phenyl-2-(*m*-tolyl)ethyl)-1-phenylpyrrolidin-2-one (3ja).

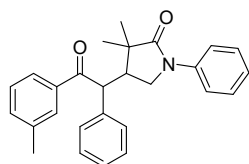

White solid (35.7 mg, 45% yield); **mp** 201.8 – 202.6 °C;  **$^1\text{H}$  NMR** (400 MHz,  $\text{CDCl}_3$ )  $\delta$  7.87 – 7.81 (m, 2H), 7.61 (d,  $J = 8.2$  Hz, 2H), 7.46 (d,  $J = 7.5$  Hz, 2H), 7.38 – 7.29 (m, 6H), 7.26 (t,  $J = 3.7$  Hz, 1H), 7.11 (t,  $J = 7.4$  Hz, 1H), 4.82 (d,  $J = 10.8$  Hz, 1H), 4.09 – 3.98 (m, 1H), 3.46 – 3.33 (m, 1H), 3.33 – 3.19 (m, 1H), 2.39 (s, 3H), 1.24 (s, 3H), 0.67 (s, 3H);  **$^{13}\text{C}$  NMR** (100 MHz,  $\text{CDCl}_3$ ) 198.2, 178.5, 139.4, 138.7, 136.4, 136.3, 134.2, 129.3, 129.2, 129.0, 128.7, 128.6, 127.9, 125.9, 124.4, 119.7, 53.1, 49.9, 45.9, 44.6, 24.4, 21.4, 18.9; **IR** (KBr) ( $\nu$ ,  $\text{cm}^{-1}$ ): 3032, 2965, 1698, 1667, 1601, 1585, 1487, 1460, 1396; **HRMS** (ESI)  $m/z$  calcd for  $[\text{M} + \text{H}]^+ \text{C}_{27}\text{H}_{28}\text{NO}_2$ : 398.2115; found: 398.2113.

#### 4-(2-(3,5-dichlorophenyl)-2-oxo-1-phenylethyl)-3,3-dimethyl-1-phenylpyrrolidin-2-one (3ka).

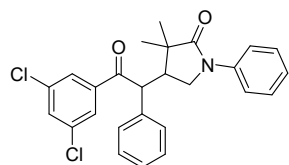

White solid (50.8 mg, 56% yield); **mp** 130.5 – 131.8 °C;  **$^1\text{H}$  NMR** (400 MHz,  $\text{CDCl}_3$ )  $\delta$  7.85 (s, 2H), 7.61 (d,  $J = 8.2$  Hz, 2H), 7.51 (s, 1H), 7.42 (t,  $J = 7.6$  Hz, 2H), 7.39 – 7.32 (m, 4H), 7.29 (t,  $J = 7.2$  Hz, 1H), 7.13 (t,  $J = 7.4$  Hz, 1H), 4.66 (d,  $J = 10.8$  Hz, 1H), 4.09 – 3.96 (m, 1H), 3.37 (t,  $J = 9.8$  Hz, 1H), 3.28 – 3.16 (m, 1H), 1.24 (s, 3H), 0.65 (s, 3H);  **$^{13}\text{C}$  NMR** (100 MHz,  $\text{CDCl}_3$ )  $\delta$  195.4, 178.2, 139.3, 138.6, 135.8, 135.2, 133.0, 129.4, 129.2, 128.8, 128.4, 127.1, 124.5, 119.7, 53.7, 49.8, 45.8, 44.6, 24.3, 18.9; **IR** (KBr) ( $\nu$ ,  $\text{cm}^{-1}$ ): 3075, 2968, 1684, 1598, 1567, 1492, 1458, 1417; **HRMS** (ESI)  $m/z$  calcd for  $[\text{M} + \text{H}]^+ \text{C}_{26}\text{H}_{24}\text{Cl}_2\text{NO}_2$ : 452.1179; found: 452.1183.

#### 3,3-dimethyl-4-(2-(naphthalen-2-yl)-2-oxo-1-phenylethyl)-1-phenylpyrrolidin-2-one (3la).

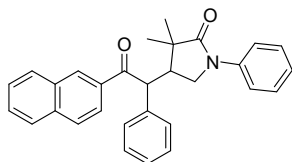

White solid (63.4 mg, 73% yield); **mp** 171.5 – 173.2 °C; **<sup>1</sup>H NMR** (400 MHz, CDCl<sub>3</sub>) δ 8.58 (s, 1H), 8.06 (d, *J* = 8.6 Hz, 1H), 7.98 (d, *J* = 7.9 Hz, 1H), 7.92 – 7.80 (m, 2H), 7.65 – 7.51 (m, 6H), 7.37 – 7.29 (m, 4H), 7.25 (d, *J* = 7.0 Hz, 1H), 7.11 (t, *J* = 7.4 Hz, 1H), 4.99 (d, *J* = 10.8 Hz, 1H), 4.09 (t, *J* = 8.4 Hz, 1H), 3.44 (t, *J* = 9.8 Hz, 1H), 3.38 – 3.26 (m, 1H), 1.29 (s, 3H), 0.70 (s, 3H); **<sup>13</sup>C NMR** (100 MHz, CDCl<sub>3</sub>) δ 197.9, 178.5, 139.4, 136.4, 135.6, 133.6, 132.4, 130.4, 129.7, 129.3, 129.1, 128.8(2), 128.7(5), 128.6(9), 127.9, 127.7, 127.0, 124.4, 124.2, 53.2, 49.9, 45.9, 44.7, 24.4, 19.0; **IR** (KBr) (ν, cm<sup>-1</sup>): 3060, 2968, 1695, 1663, 1627, 1597, 1491, 1464, 1396; **HRMS** (ESI) *m/z* calcd for [M + Na]<sup>+</sup> C<sub>30</sub>H<sub>27</sub>NNaO<sub>2</sub>: 456.1934; found: 456.1937.

### 3,3-dimethyl-4-(2-oxo-1-phenyl-2-(pyridin-3-yl)ethyl)-1-phenylpyrrolidin-2-one (3ma).

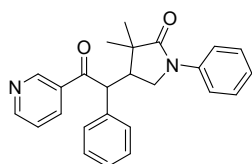

White solid (46.0 mg, 60% yield); **mp** 201.3 – 202.6 °C; **<sup>1</sup>H NMR** (400 MHz, CDCl<sub>3</sub>) δ 9.28 (s, 1H), 8.73 (d, *J* = 4.8 Hz, 1H), 8.27 (d, *J* = 8.0 Hz, 1H), 7.61 (d, *J* = 8.1 Hz, 2H), 7.45 (d, *J* = 7.4 Hz, 2H), 7.41 – 7.31 (m, 5H), 7.30 – 7.26 (m, 1H), 7.12 (t, *J* = 7.4 Hz, 1H), 4.77 (d, *J* = 10.8 Hz, 1H), 4.07 (t, *J* = 8.5 Hz, 1H), 3.40 (t, *J* = 9.8 Hz, 1H), 3.30 – 3.17 (m, 1H), 1.24 (s, 3H), 0.67 (s, 3H); **<sup>13</sup>C NMR** (100 MHz, CDCl<sub>3</sub>) δ 196.7, 178.3, 153.6, 149.9, 139.3, 136.1, 135.3, 131.4, 129.3, 129.2, 128.7, 128.3, 124.4, 123.7, 119.7, 53.8, 49.8, 45.6, 44.5, 24.3, 18.9; **IR** (KBr) (ν, cm<sup>-1</sup>): 3045, 1691, 1678, 1598, 1586, 1497, 1456, 1418; **HRMS** (ESI) *m/z* calcd for [M + H]<sup>+</sup> C<sub>25</sub>H<sub>25</sub>N<sub>2</sub>O<sub>2</sub>: 385.1911; found: 385.1907.

### 3,3-dimethyl-4-(2-oxo-1-phenyl-2-(thiophen-2-yl)ethyl)-1-phenylpyrrolidin-2-one (3na).

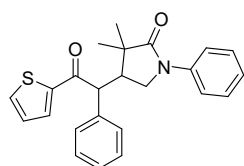

White solid (58.1 mg, 75% yield); **mp** 207.1 – 208.4 °C; **<sup>1</sup>H NMR** (400 MHz, CDCl<sub>3</sub>) δ 7.86 (d, *J* = 3.8 Hz, 1H), 7.62 (t, *J* = 7.6 Hz, 3H), 7.48 (d, *J* = 7.6 Hz, 2H), 7.33 (q, *J* = 8.1 Hz, 4H), 7.28 (d, *J* = 7.2 Hz, 1H), 7.15 – 7.08 (m, 2H), 4.60 (d, *J* = 10.9 Hz, 1H), 4.05 (t, *J* = 8.5 Hz, 1H), 3.43 (t, *J* = 9.9 Hz, 1H), 3.30 – 3.18 (m, 1H), 1.21 (s, 3H), 0.68 (s, 3H); **<sup>13</sup>C NMR** (100 MHz, CDCl<sub>3</sub>) δ 190.8, 178.4, 143.2, 139.3, 136.4, 134.6, 132.7, 129.1, 129.0, 128.7, 128.4, 128.0, 124.4, 119.7, 54.9, 49.7, 45.6, 44.6, 24.4, 18.8; **IR** (KBr) (ν, cm<sup>-1</sup>): 3081, 2969, 1697, 1644, 1597, 1500, 1484, 1459, 1413; **HRMS** (ESI) *m/z* calcd for [M + H]<sup>+</sup> C<sub>24</sub>H<sub>24</sub>NO<sub>2</sub>S: 390.1522; found: 390.1521.

### 3,3-dimethyl-4-(2-oxo-1-phenyl-2-(1H-pyrrol-2-yl)ethyl)-1-phenylpyrrolidin-2-one (3oa).

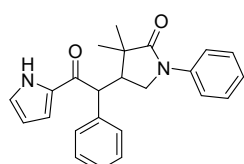

White solid (29.6 mg, 40% yield); **mp** 196.2 – 197.7 °C; **<sup>1</sup>H NMR** (400 MHz, CDCl<sub>3</sub>) δ 9.69 (s, 1H), 7.59 (d, *J* = 8.1 Hz, 2H), 7.48 (d, *J* = 7.5 Hz, 2H), 7.32 (q, *J* = 7.6 Hz, 4H), 7.24 (d, *J* = 7.6 Hz, 1H), 7.14 – 7.07 (m,

2H), 7.04 (s, 1H), 6.32 – 6.24 (m, 1H), 4.48 (d,  $J = 11.2$  Hz, 1H), 3.94 (t,  $J = 8.5$  Hz, 1H), 3.44 (t,  $J = 9.9$  Hz, 1H), 3.31 – 3.18 (m, 1H), 1.19 (s, 3H), 0.71 (s, 3H);  $^{13}\text{C}$  NMR (100 MHz,  $\text{CDCl}_3$ )  $\delta$  188.1, 178.5, 139.3, 137.2, 131.1, 128.9, 128.8, 128.7, 127.7, 125.9, 124.3, 119.7, 117.2, 111.1, 53.2, 49.7, 45.3, 44.6, 24.6, 18.8; IR (KBr) ( $\nu$ ,  $\text{cm}^{-1}$ ): 3115, 2965, 1697, 1633, 1598, 1542, 1493, 1457, 1398; HRMS (ESI)  $m/z$  calcd for  $[\text{M} + \text{H}]^+ \text{C}_{24}\text{H}_{25}\text{N}_2\text{O}_2$ : 373.1911; found: 373.1907.

### 3,3-dimethyl-4-(2-oxo-1,4-diphenylbutyl)-1-phenylpyrrolidin-2-one (3pa).

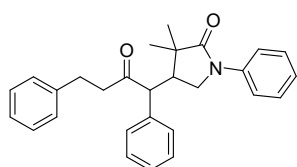

White solid (29.8 mg, 36% yield); mp 162.1 – 163.7 °C;  $^1\text{H}$  NMR (400 MHz,  $\text{CDCl}_3$ )  $\delta$  7.59 (d,  $J = 8.4$  Hz, 2H), 7.39 – 7.29 (m, 5H), 7.28 – 7.22 (m, 4H), 7.18 (d,  $J = 6.9$  Hz, 1H), 7.13 (t,  $J = 7.6$  Hz, 1H), 7.08 (d,  $J = 7.5$  Hz, 2H), 3.99 – 3.92 (m, 1H), 3.76 (d,  $J = 11.0$  Hz, 1H), 3.12 (t,  $J = 9.8$  Hz, 1H), 3.06 – 2.95 (m, 1H), 2.95 – 2.83 (m, 1H), 2.81 – 2.68 (m, 3H), 1.03 (s, 3H), 0.61 (s, 3H);  $^{13}\text{C}$  NMR (100 MHz,  $\text{CDCl}_3$ )  $\delta$  207.7, 178.4, 140.4, 139.4, 135.7, 129.2, 129.1, 128.7, 128.5, 128.3, 128.1, 126.2, 124.3, 59.3, 49.6, 44.4, 44.3, 43.0, 29.9, 24.5, 18.8; IR (KBr) ( $\nu$ ,  $\text{cm}^{-1}$ ): 3060, 2982, 1713, 1691, 1598, 1498, 1489, 1456, 1405; HRMS (ESI)  $m/z$  calcd for  $[\text{M} + \text{H}]^+ \text{C}_{28}\text{H}_{30}\text{NO}_2$ : 412.2271; found: 412.2272.

### 3,3-dimethyl-4-(3-methyl-2-oxo-1-phenylbutyl)-1-phenylpyrrolidin-2-one (3qa).

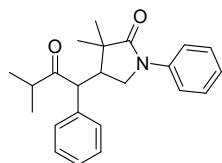

White solid (34.9 mg, 50% yield); mp 151.4 – 152.7 °C;  $^1\text{H}$  NMR (400 MHz,  $\text{CDCl}_3$ )  $\delta$  7.63 (d,  $J = 8.1$  Hz, 2H), 7.40 – 7.29 (m, 7H), 7.13 (t,  $J = 7.4$  Hz, 1H), 4.04 (t,  $J = 17.0$  Hz, 1H), 3.99 (d,  $J = 11.1$  Hz, 1H), 3.28 (t,  $J = 9.8$  Hz, 1H), 3.10 – 3.00 (m, 1H), 2.76 – 2.63 (m, 1H), 1.15 (d,  $J = 7.1$  Hz, 3H), 1.12 (s, 3H), 0.86 (d,  $J = 6.6$  Hz, 3H), 0.63 (s, 3H);  $^{13}\text{C}$  NMR (100 MHz,  $\text{CDCl}_3$ )  $\delta$  212.3, 178.5, 139.4, 135.9, 129.3, 129.0, 128.8, 128.1, 124.4, 119.8, 57.2, 49.8, 44.5, 44.4, 39.6, 24.4, 19.1, 18.8, 18.1; IR (KBr) ( $\nu$ ,  $\text{cm}^{-1}$ ): 2968, 2930, 1701, 1597, 1558, 1493, 1463, 1393; HRMS (ESI)  $m/z$  calcd for  $[\text{M} + \text{Na}]^+ \text{C}_{23}\text{H}_{27}\text{NNaO}_2$ : 372.1934; found: 372.1910.

### 4-(2-cyclohexyl-2-oxo-1-phenylethyl)-3,3-dimethyl-1-phenylpyrrolidin-2-one (3ra).

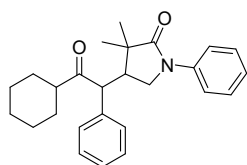

White solid (59.9 mg, 77% yield); mp 159.1 – 161.0 °C;  $^1\text{H}$  NMR (400 MHz,  $\text{CDCl}_3$ )  $\delta$  7.62 (d,  $J = 8.1$  Hz, 2H), 7.40 – 7.28 (m, 7H), 7.13 (t,  $J = 7.4$  Hz, 1H), 4.04 – 3.95 (m, 2H), 3.26 (t,  $J = 9.8$  Hz, 1H), 3.10 – 2.98 (m, 1H), 2.50 – 2.34 (m, 1H), 1.99 – 1.90 (m, 1H), 1.87 – 1.76 (m, 1H), 1.64 (d,  $J = 11.3$  Hz, 2H), 1.40 – 1.14 (m, 5H), 1.11 (s, 3H), 1.10 – 1.01 (m, 1H), 0.62 (s, 3H);  $^{13}\text{C}$  NMR (100 MHz,  $\text{CDCl}_3$ )  $\delta$  211.4, 178.5, 139.4, 135.7, 129.3, 129.0, 128.7, 128.0, 124.4, 119.8, 57.1, 49.9, 49.8, 44.6, 44.4, 29.4, 28.1, 25.9, 25.6, 25.0, 24.4, 18.8; IR (KBr) ( $\nu$ ,  $\text{cm}^{-1}$ ): 2966,

2929, 1711, 1684, 1598, 1505, 1491, 1459, 1404; **HRMS** (ESI)  $m/z$  calcd for  $[M + Na]^+$   $C_{26}H_{31}NNaO_2$ : 412.2247; found: 412.2235.

**3,3-dimethyl-4-(2-oxo-1,2-di-*p*-tolylethyl)-1-phenylpyrrolidin-2-one (3fb).**

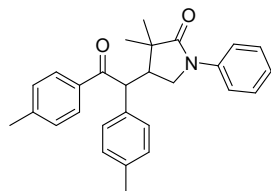

White solid (73.2 mg, 89% yield); **mp** 168.0 – 168.7 °C; **<sup>1</sup>H NMR** (400 MHz,  $CDCl_3$ )  $\delta$  7.94 (d,  $J = 7.9$  Hz, 2H), 7.60 (d,  $J = 8.1$  Hz, 2H), 7.31 (q,  $J = 7.8$  Hz, 4H), 7.21 (d,  $J = 7.9$  Hz, 2H), 7.14 – 7.07 (m, 3H), 4.77 (d,  $J = 10.8$  Hz, 1H), 4.02 (t,  $J = 8.5$  Hz, 1H), 3.36 (t,  $J = 9.9$  Hz, 1H), 3.27 – 3.18 (m, 1H), 2.35 (s, 3H), 2.27 (s, 3H), 1.23 (s, 3H), 0.69 (s, 3H); **<sup>13</sup>C NMR** (100 MHz,  $CDCl_3$ )  $\delta$  197.5, 178.6, 144.2, 139.4, 137.5, 133.6, 133.3, 129.6, 129.3, 129.0, 128.8, 128.6, 124.2, 119.8, 119.6, 52.4, 49.8, 45.6, 44.6, 24.4, 21.5, 21.0, 18.8; **IR** (KBr) ( $\nu$ ,  $cm^{-1}$ ): 3027, 2971, 1691, 1666, 1603, 1571, 1493, 1485, 1458, 1396, 782, 690; **HRMS** (ESI)  $m/z$  calcd for  $[M + H]^+$   $C_{28}H_{30}NO_2$ : 412.2271; found: 412.2262.

**4-(1-(4-methoxyphenyl)-2-oxo-2-(*p*-tolyl)ethyl)-3,3-dimethyl-1-phenylpyrrolidin-2-one (3fc).**

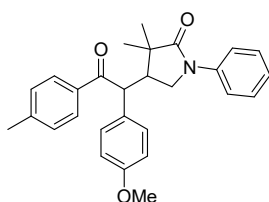

White solid (60.4 mg, 71% yield); **mp** 173.2 – 174.9 °C; **<sup>1</sup>H NMR** (400 MHz,  $CDCl_3$ )  $\delta$  7.93 (d,  $J = 7.9$  Hz, 2H), 7.60 (d,  $J = 8.1$  Hz, 2H), 7.41 – 7.29 (m, 4H), 7.23 (d,  $J = 8.0$  Hz, 2H), 7.10 (t,  $J = 7.4$  Hz, 1H), 6.85 (d,  $J = 8.3$  Hz, 2H), 4.74 (d,  $J = 10.9$  Hz, 1H), 4.12 – 3.94 (m, 1H), 3.76 (s, 3H), 3.36 (t,  $J = 9.9$  Hz, 1H), 3.28 – 3.13 (m, 1H), 2.38 (s, 3H), 1.22 (s, 3H), 0.71 (s, 3H); **<sup>13</sup>C NMR** (100 MHz,  $CDCl_3$ )  $\delta$  197.7, 178.6, 159.1, 144.3, 139.5, 133.7, 130.2, 129.4, 128.8, 128.7, 128.3, 124.3, 119.7, 114.4, 55.2, 52.0, 49.9, 45.7, 44.6, 24.5, 21.6, 18.9; **IR** (KBr) ( $\nu$ ,  $cm^{-1}$ ): 3032, 2969, 1684, 1673, 1607, 1510, 1463, 1406; **HRMS** (ESI)  $m/z$  calcd for  $[M + K]^+$   $C_{28}H_{29}KNO_3$ : 466.1779; found: 466.1761.

**4-(1-(4-chlorophenyl)-2-oxo-2-(*p*-tolyl)ethyl)-3,3-dimethyl-1-phenylpyrrolidin-2-one (3fd).**

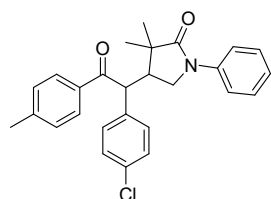

White solid (74.6 mg, 90% yield); **mp** 197.5 – 198.3 °C; **<sup>1</sup>H NMR** (400 MHz,  $CDCl_3$ )  $\delta$  7.91 (d,  $J = 8.0$  Hz, 2H), 7.59 (d,  $J = 8.2$  Hz, 2H), 7.41 (d,  $J = 8.3$  Hz, 2H), 7.35 – 7.29 (m, 4H), 7.25 (d,  $J = 7.5$  Hz, 2H), 7.11 (t,  $J = 7.4$  Hz, 1H), 4.79 (d,  $J = 10.9$  Hz, 1H), 4.07 – 3.96 (m, 1H), 3.37 (t,  $J = 9.9$  Hz, 1H), 3.26 – 3.15 (m, 1H), 2.39 (s, 3H), 1.22 (s, 3H), 0.72 (s, 3H); **<sup>13</sup>C NMR** (100 MHz,  $CDCl_3$ )  $\delta$  197.3, 178.2, 144.8, 139.3, 135.1, 133.8, 133.5, 130.5, 129.6, 129.3, 128.8, 124.4, 119.7, 52.1, 49.7, 45.9, 44.6, 24.7, 21.6, 19.0; **IR** (KBr) ( $\nu$ ,  $cm^{-1}$ ): 3064, 2968, 1690, 1674, 1599, 1501, 1489, 1458, 1400; **HRMS** (ESI)  $m/z$  calcd for  $[M + H]^+$   $C_{27}H_{27}ClNO_2$ : 432.1725; found: 432.1720.

**4-(1-(4-bromophenyl)-2-oxo-2-(*p*-tolyl)ethyl)-3,3-dimethyl-1-phenylpyrrolidin-2-one (3fe).**

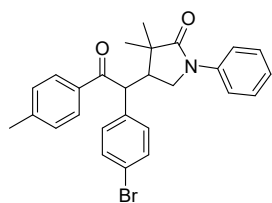

White solid (87.6 mg, 92% yield); **mp** 209.7 – 210.7 °C; **<sup>1</sup>H NMR** (400 MHz, CDCl<sub>3</sub>)  $\delta$  7.94 (d,  $J$  = 7.9 Hz, 2H), 7.60 (d,  $J$  = 8.1 Hz, 2H), 7.31 (q,  $J$  = 7.8 Hz, 4H), 7.21 (d,  $J$  = 7.9 Hz, 2H), 7.11 (d,  $J$  = 7.4 Hz, 2H), 7.08 (d,  $J$  = 7.2 Hz, 1H), 4.77 (d,  $J$  = 10.8 Hz, 1H), 4.02 (t,  $J$  = 8.5 Hz, 1H), 3.36 (t,  $J$  = 9.9 Hz, 1H), 3.28 – 3.12 (m, 1H), 2.35 (s, 3H), 2.27 (s, 3H), 1.23 (s, 3H), 0.69 (s, 3H); **<sup>13</sup>C NMR** (100 MHz, CDCl<sub>3</sub>)  $\delta$  197.1, 178.2, 144.7, 139.3, 135.6, 133.4, 132.2, 130.7, 129.5, 128.7, 124.4, 121.9, 119.7, 52.1, 49.7, 45.8, 44.5, 24.7, 21.6, 19.0; **IR** (KBr) ( $\nu$ , cm<sup>-1</sup>): 3062, 2968, 1690, 1674, 1607, 1598, 1573, 1500, 1458, 1399; **HRMS** (ESI)  $m/z$  calcd for [M + H]<sup>+</sup> C<sub>27</sub>H<sub>27</sub>BrNO<sub>2</sub>: 476.1220; found: 476.1214.

**4-(1-(4-fluorophenyl)-2-oxo-2-(*p*-tolyl)ethyl)-3,3-dimethyl-1-phenylpyrrolidin-2-one (3ff).**

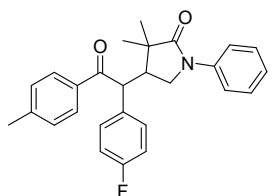

White solid (76.7 mg, 92% yield); **mp** 146.5 – 147.8 °C; **<sup>1</sup>H NMR** (400 MHz, CDCl<sub>3</sub>)  $\delta$  7.92 (d,  $J$  = 7.7 Hz, 2H), 7.59 (d,  $J$  = 8.2 Hz, 2H), 7.47 – 7.40 (m, 2H), 7.32 (t,  $J$  = 7.5 Hz, 2H), 7.25 (d,  $J$  = 7.1 Hz, 2H), 7.11 (t,  $J$  = 7.4 Hz, 1H), 7.03 (t,  $J$  = 8.2 Hz, 2H), 4.80 (d,  $J$  = 10.9 Hz, 1H), 4.05 – 3.96 (m, 1H), 3.36 (t,  $J$  = 9.9 Hz, 1H), 3.26 – 3.16 (m, 1H), 2.39 (s, 3H), 1.22 (s, 3H), 0.71 (s, 3H); **<sup>13</sup>C NMR** (100 MHz, CDCl<sub>3</sub>)  $\delta$  197.5, 178.3, 162.2 (d,  $J_{C-F}$  = 246.3 Hz), 144.7, 139.3, 133.5, 132.3 (d,  $J_{C-F}$  = 3.2 Hz), 130.7 (d,  $J_{C-F}$  = 8.0 Hz), 129.5, 128.8, 124.4, 119.7, 116.0 (d,  $J_{C-F}$  = 21.4 Hz), 51.9, 49.7, 45.9, 44.6, 24.6, 21.6, 19.0; **<sup>19</sup>F NMR** (376 MHz, CDCl<sub>3</sub>)  $\delta$  -113.87; **IR** (KBr) ( $\nu$ , cm<sup>-1</sup>): 3058, 1701, 1671, 1605, 1573, 1493, 1461, 1395; **HRMS** (ESI)  $m/z$  calcd for [M + H]<sup>+</sup> C<sub>27</sub>H<sub>27</sub>FNO<sub>2</sub>: 416.2020; found: 416.2016.

**4-(1-(3-chlorophenyl)-2-oxo-2-(*p*-tolyl)ethyl)-3,3-dimethyl-1-phenylpyrrolidin-2-one (3fg).**

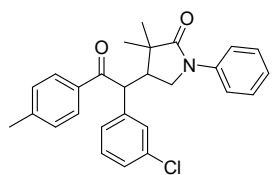

White solid (73.2 mg, 85% yield); **mp** 204.7 – 205.6 °C; **<sup>1</sup>H NMR** (400 MHz, CDCl<sub>3</sub>)  $\delta$  7.93 (d,  $J$  = 8.0 Hz, 2H), 7.59 (d,  $J$  = 8.3 Hz, 2H), 7.47 (s, 1H), 7.37 (d,  $J$  = 7.2 Hz, 1H), 7.32 (t,  $J$  = 7.8 Hz, 2H), 7.29 – 7.23 (m, 4H), 7.11 (t,  $J$  = 7.4 Hz, 1H), 4.79 (d,  $J$  = 10.8 Hz, 1H), 4.00 (s, 1H), 3.37 (t,  $J$  = 9.8 Hz, 1H), 3.30 – 3.13 (m, 1H), 2.39 (s, 3H), 1.23 (s, 3H), 0.73 (s, 3H); **<sup>13</sup>C NMR** (100 MHz, CDCl<sub>3</sub>)  $\delta$  197.1, 178.2, 144.8, 139.3, 138.6, 134.8, 133.5, 130.2, 129.6, 129.2, 128.7(8), 128.7(5), 128.1, 127.4, 124.4, 119.8, 52.3, 49.7, 46.0, 44.6, 24.6, 21.6, 19.0; **IR** (KBr) ( $\nu$ , cm<sup>-1</sup>): 3058, 1701, 1671, 1605, 1573, 1493, 1461, 1395; **HRMS** (ESI)  $m/z$  calcd for [M + H]<sup>+</sup> C<sub>27</sub>H<sub>27</sub>ClNO<sub>2</sub>: 432.1725; found: 432.1719.

**4-(1-(2-chlorophenyl)-2-oxo-2-(*p*-tolyl)ethyl)-3,3-dimethyl-1-phenylpyrrolidin-2-one (3fh).**

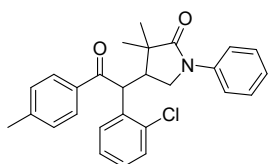

White solid (70.8 mg, 82% yield); **mp** 178.6 – 179.4 °C; **<sup>1</sup>H NMR** (400 MHz, CDCl<sub>3</sub>) δ 8.05 (d, *J* = 7.6 Hz, 2H), 7.63 (d, *J* = 7.7 Hz, 1H), 7.58 (d, *J* = 8.1 Hz, 2H), 7.38 (d, *J* = 7.4 Hz, 1H), 7.32 (t, *J* = 7.9 Hz, 2H), 7.27 (d, *J* = 7.9 Hz, 2H), 7.23 (s, 1H), 7.19 (t, *J* = 6.9 Hz, 1H), 7.11 (t, *J* = 7.4 Hz, 1H), 5.33 (d, *J* = 10.4 Hz, 1H), 3.93 (t, *J* = 8.4 Hz, 1H), 3.49 (t, *J* = 9.8 Hz, 1H), 3.36 – 3.19 (m, 1H), 2.40 (s, 3H), 1.24 (s, 3H), 0.76 (s, 3H); **<sup>13</sup>C NMR** (100 MHz, CDCl<sub>3</sub>) δ 198.3, 178.4, 144.9, 139.4, 134.1, 133.9, 130.6, 130.4, 129.5, 129.1, 128.9, 128.7, 127.4, 124.4, 119.8, 49.6, 47.4, 47.2, 44.8, 24.6, 21.6, 19.9; **IR** (KBr) (ν, cm<sup>-1</sup>): 3065, 1694, 1663, 1604, 1571, 1503, 1459, 1398; **HRMS** (ESI) *m/z* calcd for [M + H]<sup>+</sup> C<sub>27</sub>H<sub>27</sub>ClNO<sub>2</sub>: 432.1725; found: 432.1719.

**1-(4-methoxyphenyl)-3,3-dimethyl-4-(2-oxo-1-phenyl-2-(p-tolyl)ethyl)pyrrolidin-2-one (3fi).**

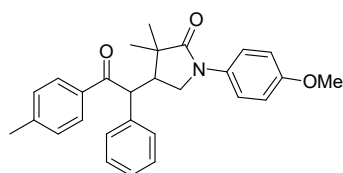

White solid (44.5 mg, 52% yield); **mp** 199.9 – 201.7 °C; **<sup>1</sup>H NMR** (400 MHz, CDCl<sub>3</sub>) δ 7.94 (d, *J* = 7.9 Hz, 2H), 7.52 – 7.44 (m, 4H), 7.31 (t, *J* = 7.5 Hz, 2H), 7.24 (t, *J* = 6.8 Hz, 3H), 6.85 (d, *J* = 8.6 Hz, 2H), 4.80 (d, *J* = 10.7 Hz, 1H), 3.98 (t, *J* = 8.3 Hz, 1H), 3.77 (s, 3H), 3.34 (t, *J* = 9.8 Hz, 1H), 3.28 – 3.20 (m, 1H), 2.37 (s, 3H), 1.22 (s, 3H), 0.66 (s, 3H); **<sup>13</sup>C NMR** (100 MHz, CDCl<sub>3</sub>) δ 197.6, 178.1, 156.3, 144.4, 136.5, 133.6, 132.6, 129.4, 129.2, 129.0, 128.8, 127.8, 121.4, 113.9, 55.4, 52.8, 50.2, 45.9, 44.4, 24.4, 21.6, 18.9; **IR** (KBr) (ν, cm<sup>-1</sup>): 2966, 1691, 1666, 1603, 1514, 1496, 1456, 1404; **HRMS** (ESI) *m/z* calcd for [M + H]<sup>+</sup> C<sub>28</sub>H<sub>30</sub>NO<sub>3</sub>: 428.2220; found: 428.2213.

**1-(4-chlorophenyl)-3,3-dimethyl-4-(2-oxo-1-phenyl-2-(p-tolyl)ethyl)pyrrolidin-2-one (3fj).**

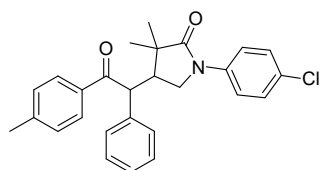

White solid (31.6 mg, 37% yield); **mp** 236.7 – 237.2 °C; **<sup>1</sup>H NMR** (400 MHz, CDCl<sub>3</sub>) δ 7.94 (d, *J* = 7.9 Hz, 2H), 7.57 (d, *J* = 8.6 Hz, 2H), 7.45 (d, *J* = 7.6 Hz, 2H), 7.32 (t, *J* = 7.5 Hz, 2H), 7.29 (s, 1H), 7.27 – 7.21 (m, 4H), 4.79 (d, *J* = 10.7 Hz, 1H), 4.05 – 3.97 (m, 1H), 3.34 (t, *J* = 9.7 Hz, 1H), 3.30 – 3.18 (m, 1H), 2.38 (s, 3H), 1.23 (s, 3H), 0.66 (s, 3H); **<sup>13</sup>C NMR** (100 MHz, CDCl<sub>3</sub>) δ 197.4, 178.6, 144.5, 137.9, 136.3, 133.5, 129.4, 129.3, 129.2, 129.0, 128.8, 128.7, 127.9, 120.7, 52.8, 49.8, 45.7, 44.6, 24.3, 21.6, 18.9; **IR** (KBr) (ν, cm<sup>-1</sup>): 3068, 1698, 1666, 1602, 1570, 1494, 1452, 1419; **HRMS** (ESI) *m/z* calcd for [M + H]<sup>+</sup> C<sub>27</sub>H<sub>27</sub>ClNO<sub>2</sub>: 432.1725; found: 432.1724.

**1-benzyl-3,3-dimethyl-4-(2-oxo-1-phenyl-2-(p-tolyl)ethyl)pyrrolidin-2-one (3fk).**

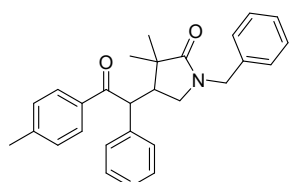

White solid (70.0 mg, 85% yield); **mp** 193.4 – 197.5 °C; **<sup>1</sup>H NMR** (400 MHz, CDCl<sub>3</sub>) δ 7.90 (d, *J* = 7.9 Hz, 2H), 7.47 (d, *J* = 7.6 Hz, 2H),

7.39 – 7.31 (m, 5H), 7.30 (d,  $J = 8.9$  Hz, 1H), 7.26 – 7.21 (m, 4H), 4.77 – 4.67 (m, 2H), 4.29 (d,  $J = 14.6$  Hz, 1H), 3.50 (t,  $J = 8.7$  Hz, 1H), 3.25 – 3.10 (m, 1H), 2.79 (t,  $J = 9.8$  Hz, 1H), 2.39 (s, 3H), 1.21 (s, 3H), 0.68 (s, 3H);  $^{13}\text{C}$  NMR (100 MHz,  $\text{CDCl}_3$ )  $\delta$  197.5, 179.3, 144.3, 136.6, 136.5, 133.6, 129.3, 129.2, 128.9, 128.7(1), 128.6(6), 128.0, 127.7, 127.5, 52.8, 48.4, 46.6, 46.5, 43.2, 24.2, 21.5, 18.8; IR (KBr) ( $\nu$ ,  $\text{cm}^{-1}$ ): 3063, 3038, 1678, 1667, 1604, 1491, 1456, 1411; HRMS (ESI)  $m/z$  calcd for  $[\text{M} + \text{H}]^+$   $\text{C}_{28}\text{H}_{30}\text{NO}_2$ : 412.2271; found: 412.2268.

**3,3-dimethyl-4-(2-oxo-1-phenyl-2-(*p*-tolyl)ethyl)-1-tosylpyrrolidin-2-one (3fl).**

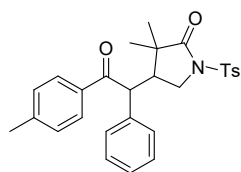

White solid (19.0 mg, 20% yield); mp 235.5 – 243.4 °C;  $^1\text{H}$  NMR (400 MHz,  $\text{CDCl}_3$ )  $\delta$  7.90 (t,  $J = 8.4$  Hz, 4H), 7.37 (d,  $J = 7.6$  Hz, 2H), 7.35 – 7.31 (m, 2H), 7.29 (t,  $J = 7.4$  Hz, 2H), 7.22 (d,  $J = 7.7$  Hz, 3H), 4.64 (d,  $J = 10.8$  Hz, 1H), 4.22 – 4.15 (m, 1H), 3.27 (t,  $J = 10.2$  Hz, 1H), 3.14 – 3.05 (m, 1H), 2.44 (s, 3H), 2.37 (s, 3H), 1.06 (s, 3H), 0.47 (s, 3H);  $^{13}\text{C}$  NMR (100 MHz,  $\text{CDCl}_3$ )  $\delta$  196.7, 177.8, 145.1, 144.6, 135.9, 135.2, 133.4, 129.7, 129.4, 129.1, 129.0, 128.8, 128.0, 52.6, 48.1, 45.6, 44.8, 23.3, 21.7, 21.6, 18.3; IR (KBr) ( $\nu$ ,  $\text{cm}^{-1}$ ): 2048, 1726, 1671, 1607, 1493, 1455, 1410; HRMS (ESI)  $m/z$  calcd for  $[\text{M} + \text{H}]^+$   $\text{C}_{28}\text{H}_{30}\text{NO}_4\text{S}$ : 476.1890; found: 476.1884.

**3-methyl-4-(2-oxo-1-phenyl-2-(*p*-tolyl)ethyl)-1-phenylpyrrolidin-2-one (3fm).**

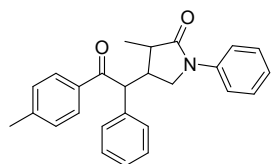

White solid (38.4 mg, 50% yield); mp 196.8 – 198.3 °C;  $^1\text{H}$  NMR (400 MHz,  $\text{CDCl}_3$ )  $\delta$  7.88 (d,  $J = 7.9$  Hz, 2H), 7.61 (d,  $J = 8.1$  Hz, 2H), 7.38 – 7.29 (m, 6H), 7.29 – 7.26 (m, 1H), 7.19 (d,  $J = 7.9$  Hz, 2H), 7.12 (t,  $J = 7.4$  Hz, 1H), 4.57 (d,  $J = 10.5$  Hz, 1H), 4.21 – 4.12 (m, 1H), 3.44 – 3.34 (m, 1H), 3.06 – 2.96 (m, 1H), 2.54 – 2.43 (m, 1H), 2.35 (s, 3H), 0.72 (d,  $J = 7.1$  Hz, 3H);  $^{13}\text{C}$  NMR (100 MHz,  $\text{CDCl}_3$ )  $\delta$  197.8, 175.8, 144.3, 139.3, 136.9, 133.6, 129.4, 129.0, 128.8, 128.5, 127.9, 124.5, 119.8, 58.9, 52.2, 42.6, 42.4, 21.6, 16.6; IR (KBr) ( $\nu$ ,  $\text{cm}^{-1}$ ): 2968, 1694, 1666, 1605, 1495, 1480, 1453, 1394; HRMS (ESI)  $m/z$  calcd for  $[\text{M} + \text{H}]^+$   $\text{C}_{26}\text{H}_{26}\text{NO}_2$ : 384.1958; found: 384.1955.

**4-(2-(4-bromophenyl)-2-hydroxy-1-phenylethyl)-3,3-dimethyl-1-phenylpyrrolidin-2-one (4).**

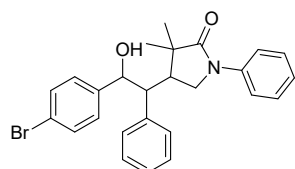

White solid; mp 232.5 – 235.9 °C;  $^1\text{H}$  NMR (400 MHz,  $\text{CDCl}_3$ )  $\delta$  7.66 (d,  $J = 8.1$  Hz, 2H), 7.38 (t,  $J = 7.9$  Hz, 2H), 7.27 (d,  $J = 7.9$  Hz, 2H), 7.24 – 7.12 (m, 4H), 7.02 (d,  $J = 6.2$  Hz, 2H), 6.75 (d,  $J = 8.2$  Hz, 2H), 5.01 (t,  $J = 3.2$  Hz, 1H), 4.11 (t,  $J = 8.3$  Hz, 1H), 3.74 (t,  $J = 9.8$  Hz, 1H), 3.15 – 3.03 (m, 1H), 2.92 – 2.81 (m, 1H), 2.21 (d,  $J = 4.0$  Hz, 1H), 0.98 (s, 3H), 0.66 (s, 3H);  $^{13}\text{C}$  NMR (100 MHz,  $\text{CDCl}_3$ )  $\delta$  179.0, 141.7, 139.5, 136.8, 130.9, 130.3, 128.8, 127.8, 127.6,

127.2, 124.5, 121.1, 119.9, 74.2, 52.8, 50.3, 44.9, 43.9, 24.9, 18.5; **IR** (KBr) ( $\nu$ ,  $\text{cm}^{-1}$ ): 3069, 3031, 1670, 1594, 1500, 1497, 1454, 1420; **HRMS** (ESI)  $m/z$  calcd for  $[\text{M} + \text{H}]^+$   $\text{C}_{26}\text{H}_{27}\text{BrNO}_2$ : 464.1220; found: 464.1206.

**2,2,6,6-tetramethylpiperidin-1-yl 4-bromobenzoate (5).<sup>3</sup>**

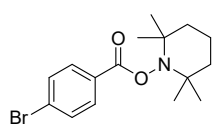

**<sup>1</sup>H NMR** (400 MHz,  $\text{CDCl}_3$ )  $\delta$  7.93 (d,  $J = 8.5$  Hz, 2H), 7.60 (d,  $J = 8.4$  Hz, 2H), 1.83 – 1.66 (m, 3H), 1.65 – 1.53 (m, 3H), 1.50 – 1.42 (m, 1H), 1.26 (s, 6H), 1.11 (s, 6H); **<sup>13</sup>C NMR** (100 MHz,  $\text{CDCl}_3$ )  $\delta$  165.7, 131.8, 131.1, 128.6, 127.9, 60.5, 39.0, 31.9, 20.8, 16.9.

**3,3-dimethyl-1-phenyl-4-(phenyl(phenylselanyl)methyl)pyrrolidin-2-one (6).**

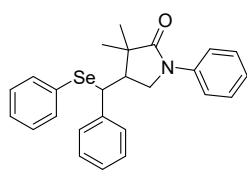

White solid (18.5 mg, 21% yield); **mp** 131.4 – 131.8 °C; **<sup>1</sup>H NMR** (400 MHz,  $\text{CDCl}_3$ )  $\delta$  7.66 (d,  $J = 8.2$  Hz, 2H), 7.39 (t,  $J = 7.7$  Hz, 2H), 7.32 (d,  $J = 7.8$  Hz, 2H), 7.29 – 7.26 (m, 1H), 7.25 – 7.13 (m, 6H), 7.10 (d,  $J = 7.0$  Hz, 2H), 4.30 (d,  $J = 11.9$  Hz, 1H), 4.20 – 4.13 (m, 1H), 3.66 (t,  $J = 10.2$  Hz, 1H), 3.05 – 2.94 (m, 1H), 1.02 (s, 3H), 0.73 (s, 3H); **<sup>13</sup>C NMR** (100 MHz,  $\text{CDCl}_3$ )  $\delta$  178.4, 140.9, 139.4, 136.2, 128.9, 128.8, 128.4, 128.3, 128.2(1), 128.1(8), 127.4, 124.4, 119.7, 51.6, 50.2, 47.7, 45.9, 24.8, 18.5; **IR** (KBr) ( $\nu$ ,  $\text{cm}^{-1}$ ): 3070, 2966, 1686, 1596, 1578, 1493, 1438, 1405; **HRMS** (ESI)  $m/z$  calcd for  $[\text{M} + \text{H}]^+$   $\text{C}_{25}\text{H}_{26}\text{NOSe}$ : 436.1174; found: 436.1171.

**7. NMR spectrum**

<sup>1</sup>H NMR spectrum of compound (2b)



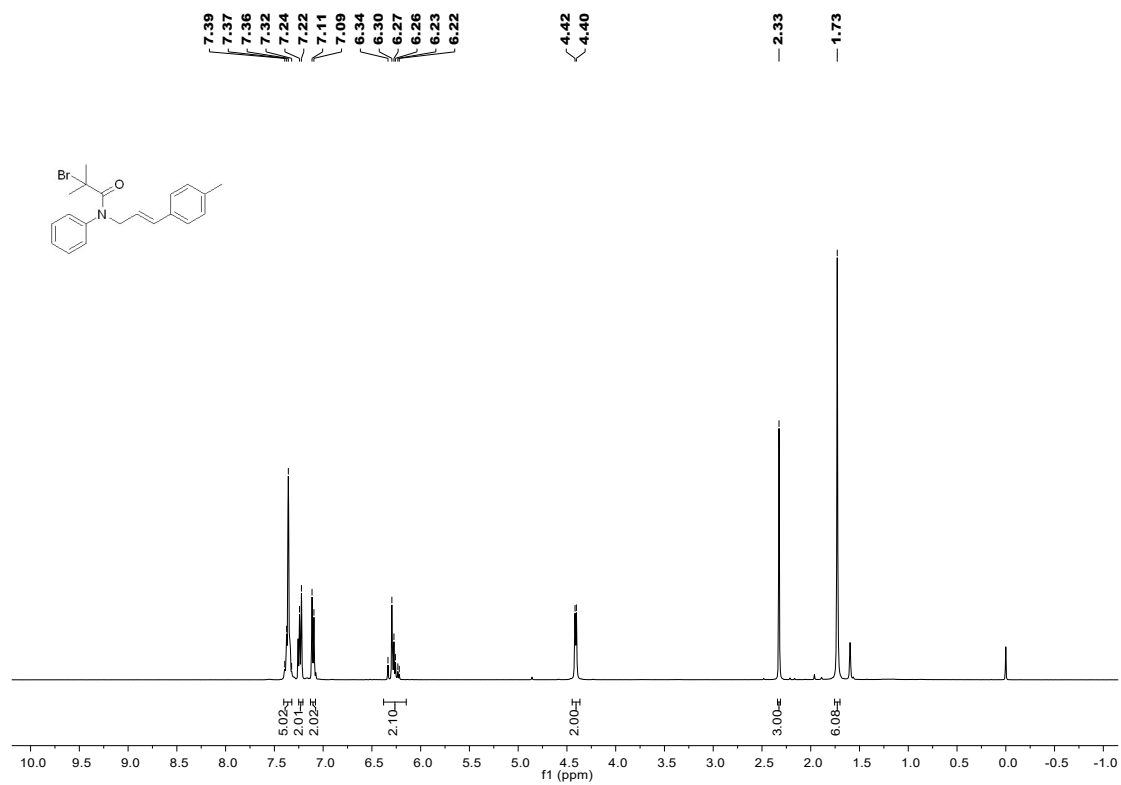

<sup>13</sup>C NMR spectrum of compound **(2b)**

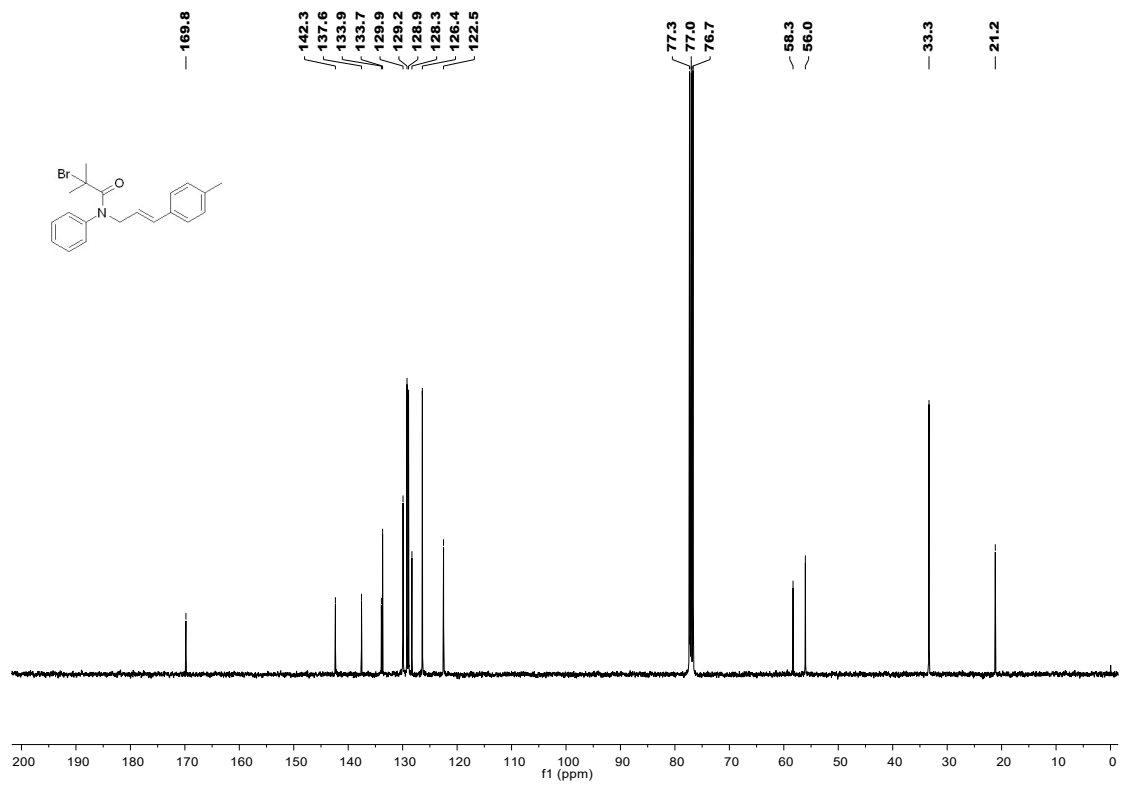

<sup>1</sup>H NMR spectrum of compound (2c)

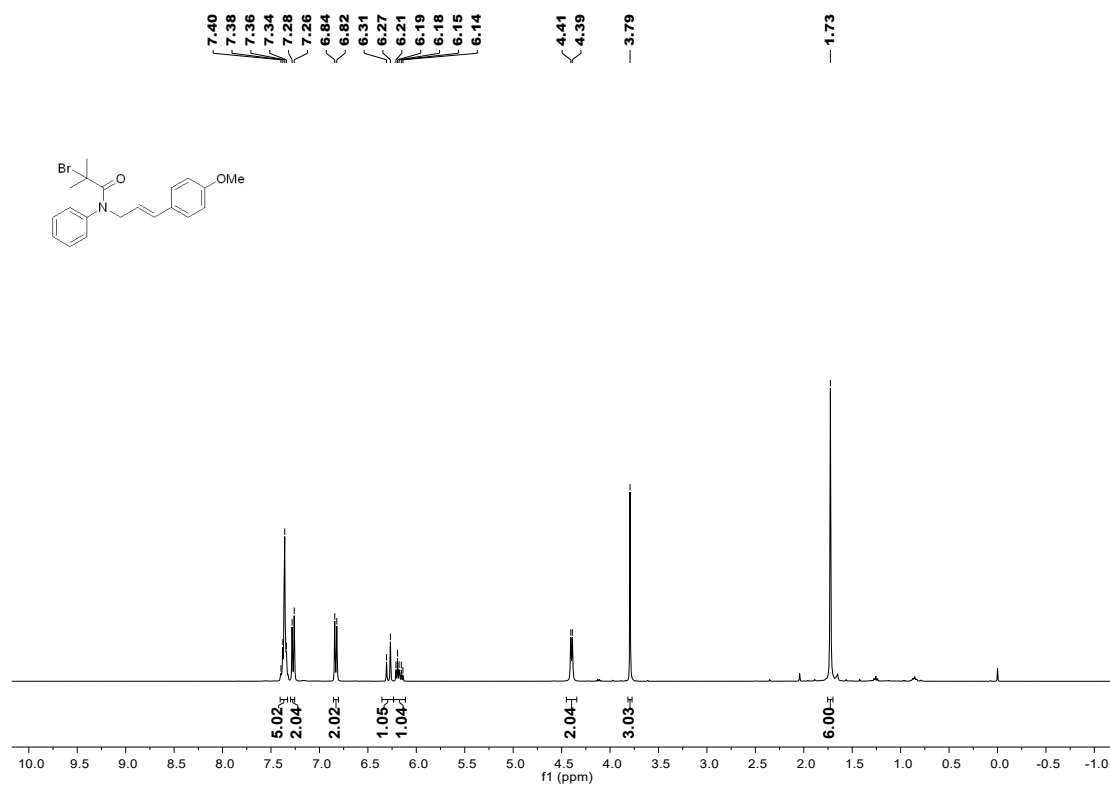

<sup>13</sup>C NMR spectrum of compound (2c)

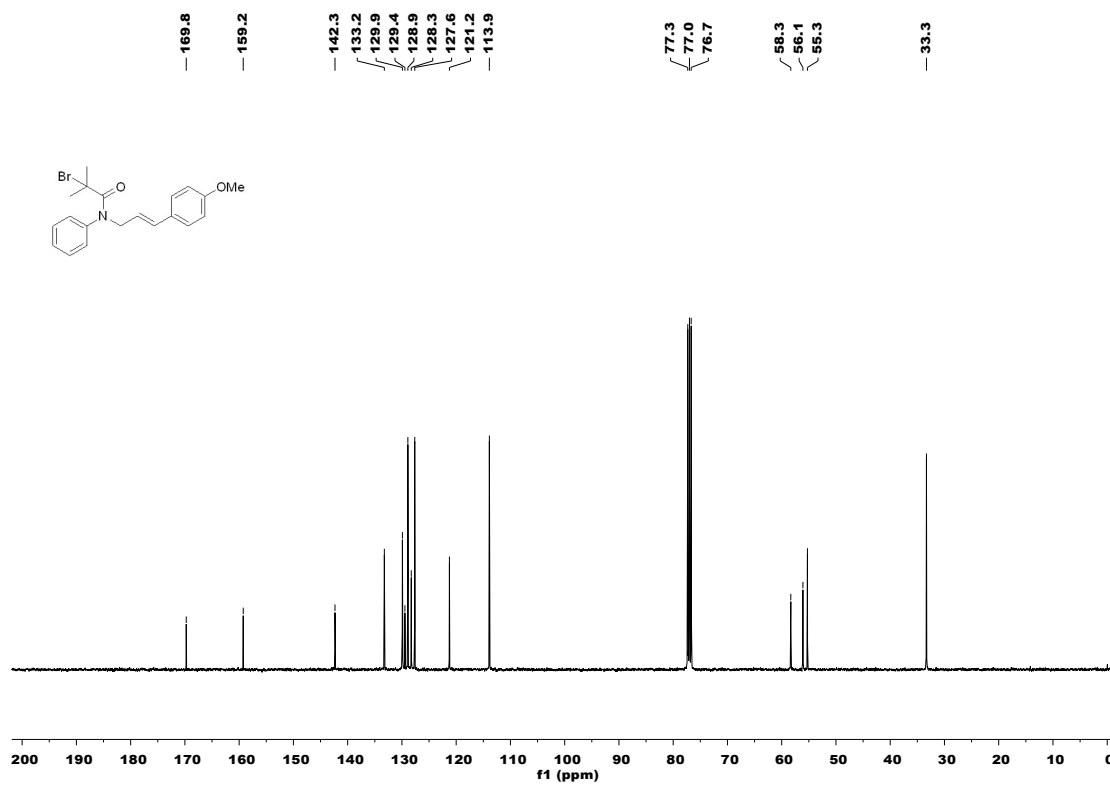

<sup>1</sup>H NMR spectrum of compound (2d)

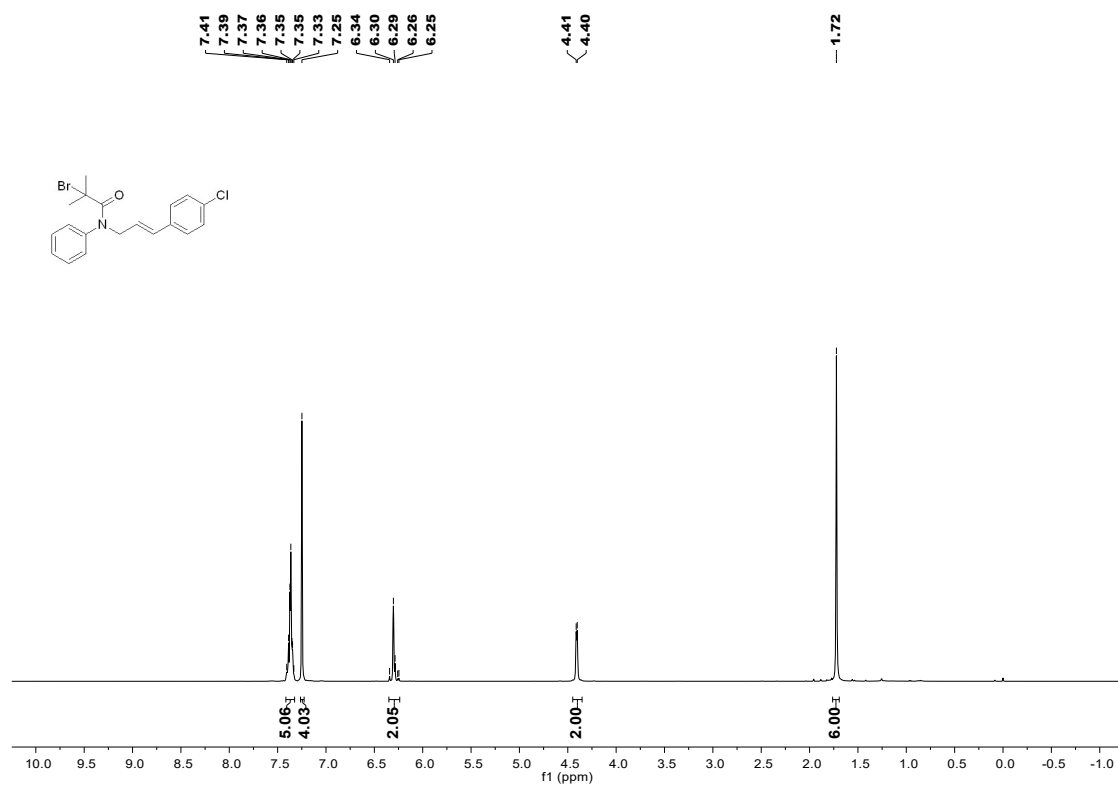

<sup>13</sup>C NMR spectrum of compound (2d)

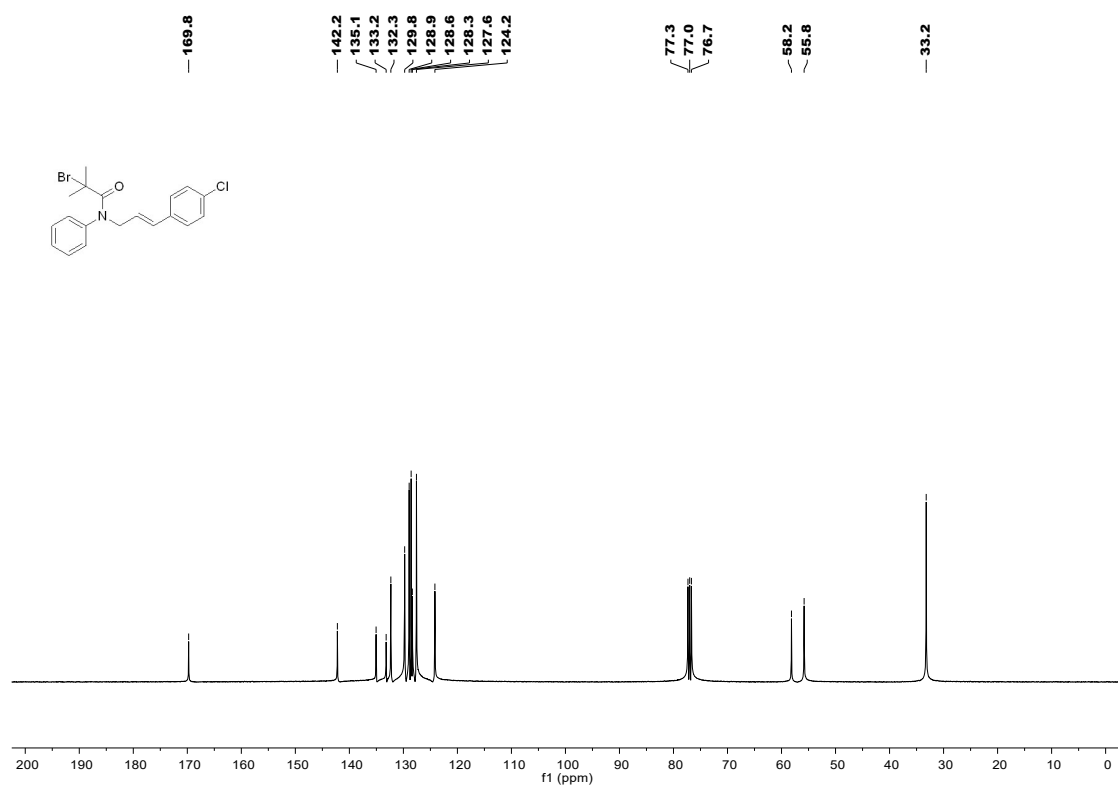

<sup>1</sup>H NMR spectrum of compound (2e)

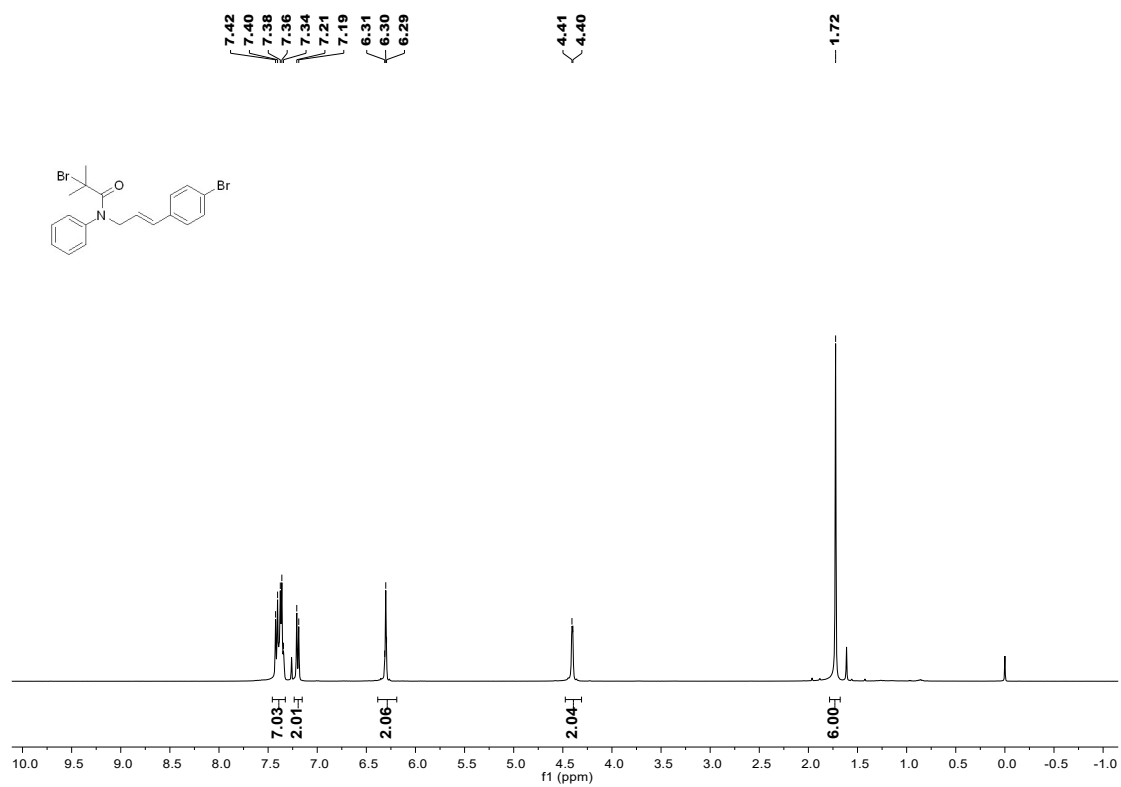

<sup>13</sup>C NMR spectrum of compound (2e)

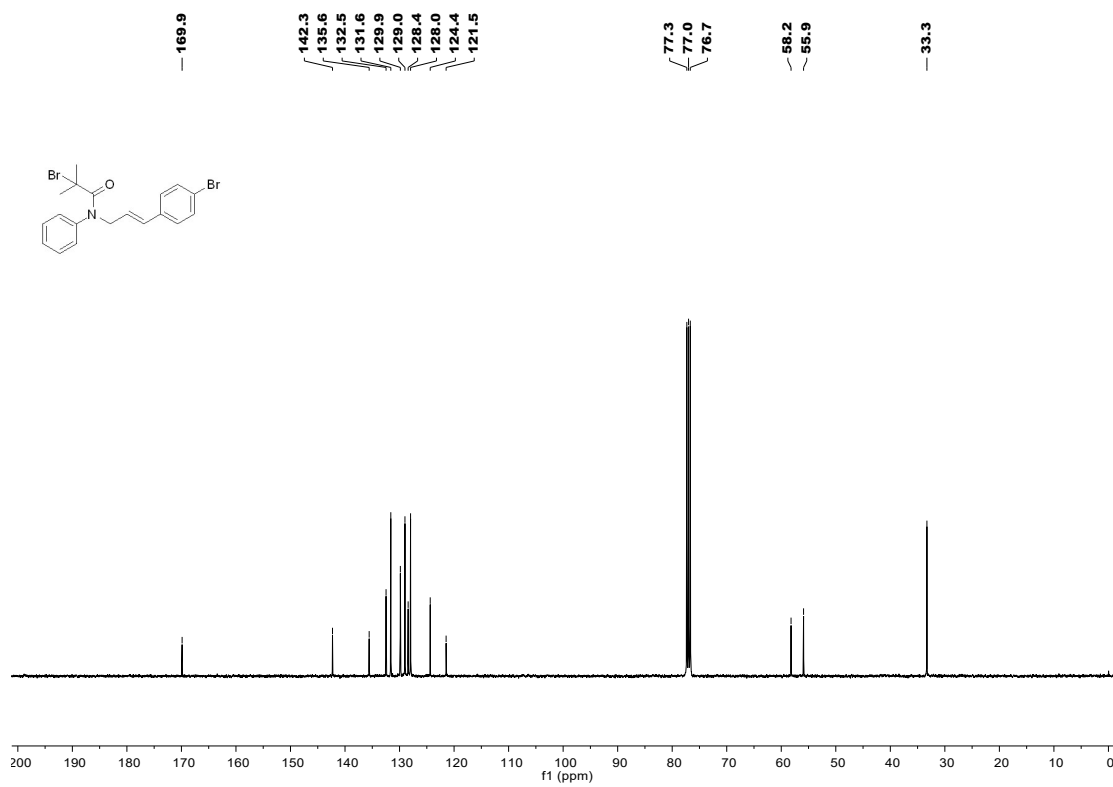

<sup>1</sup>H NMR spectrum of compound (2f)

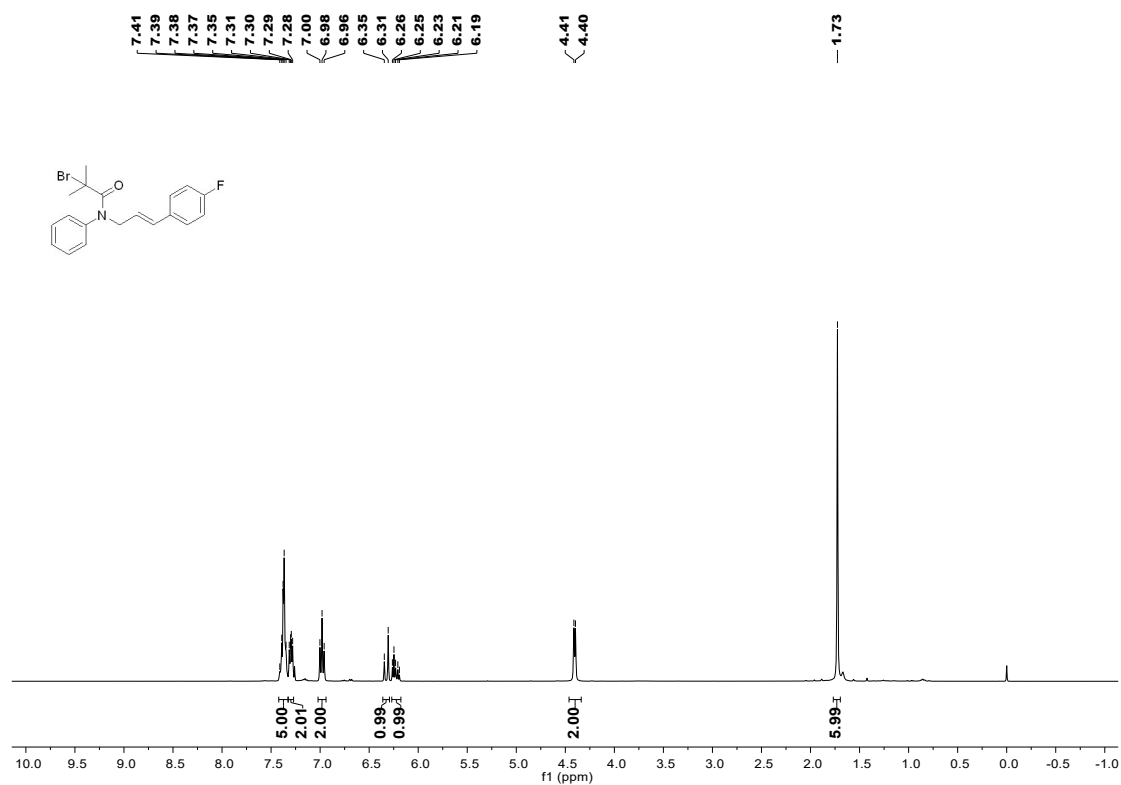

<sup>13</sup>C NMR spectrum of compound (2f)

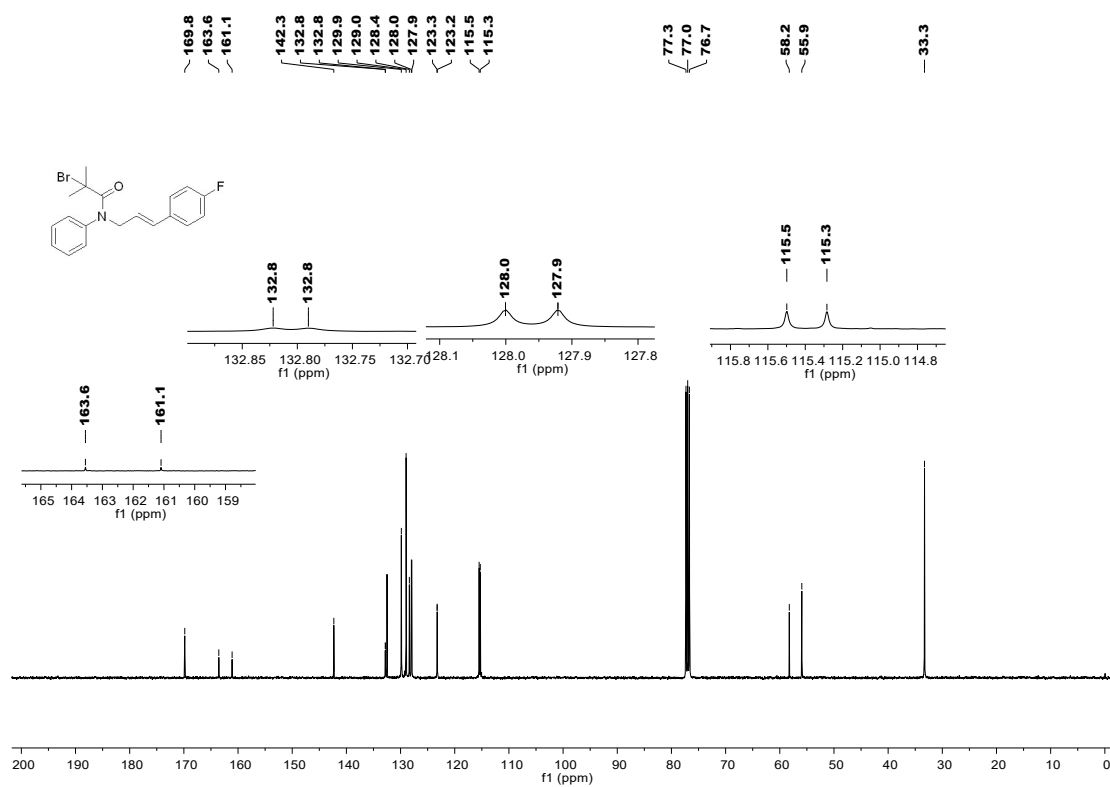

$^{19}\text{F}$  NMR spectrum of compound (2f)

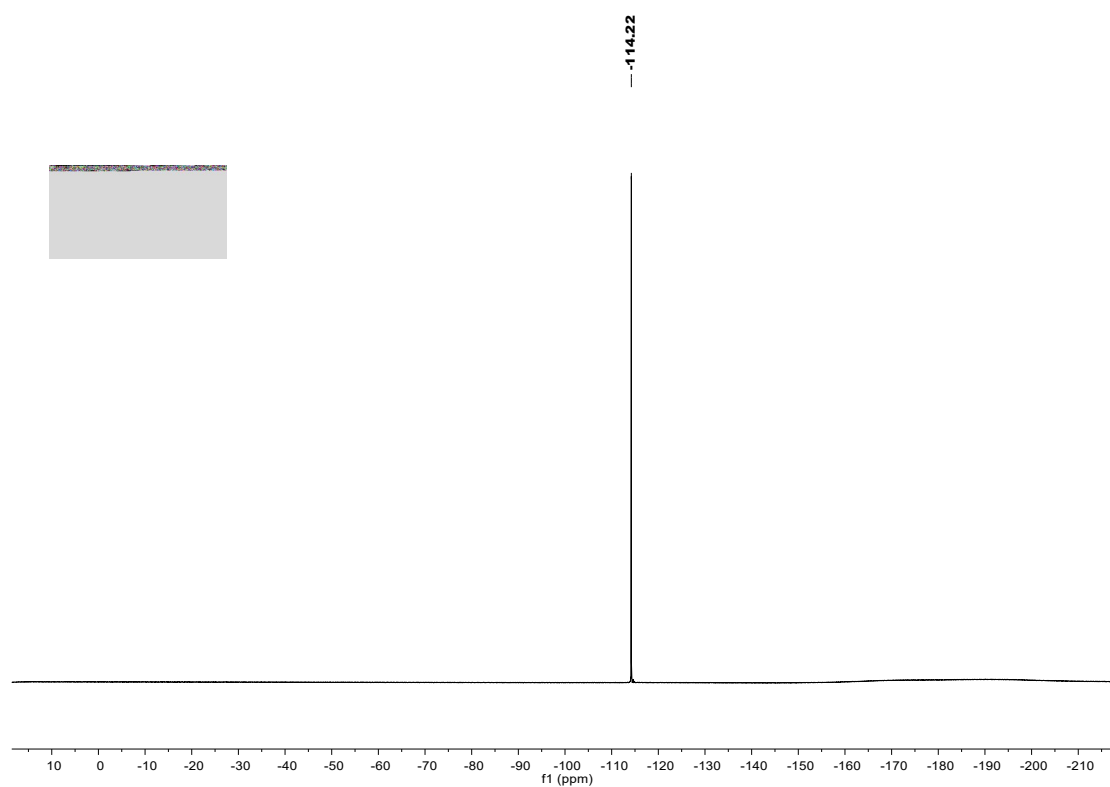

$^1\text{H}$  NMR spectrum of compound (2g)

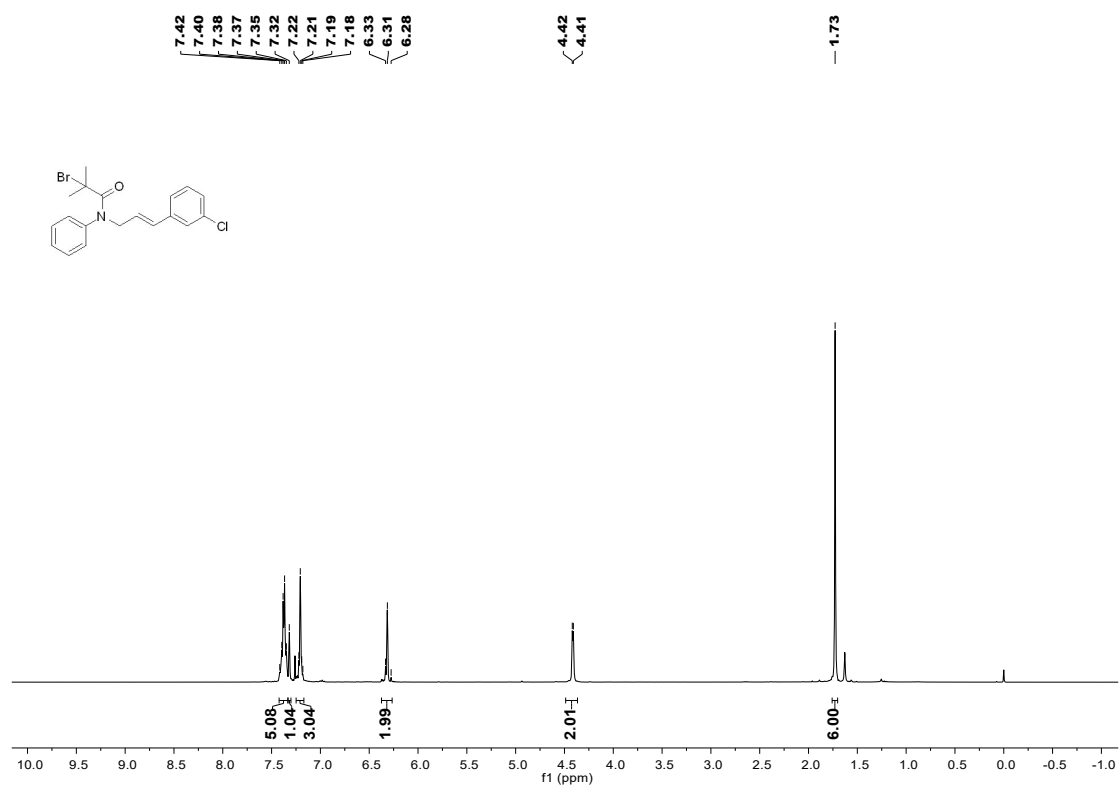

<sup>13</sup>C NMR spectrum of compound (2g)

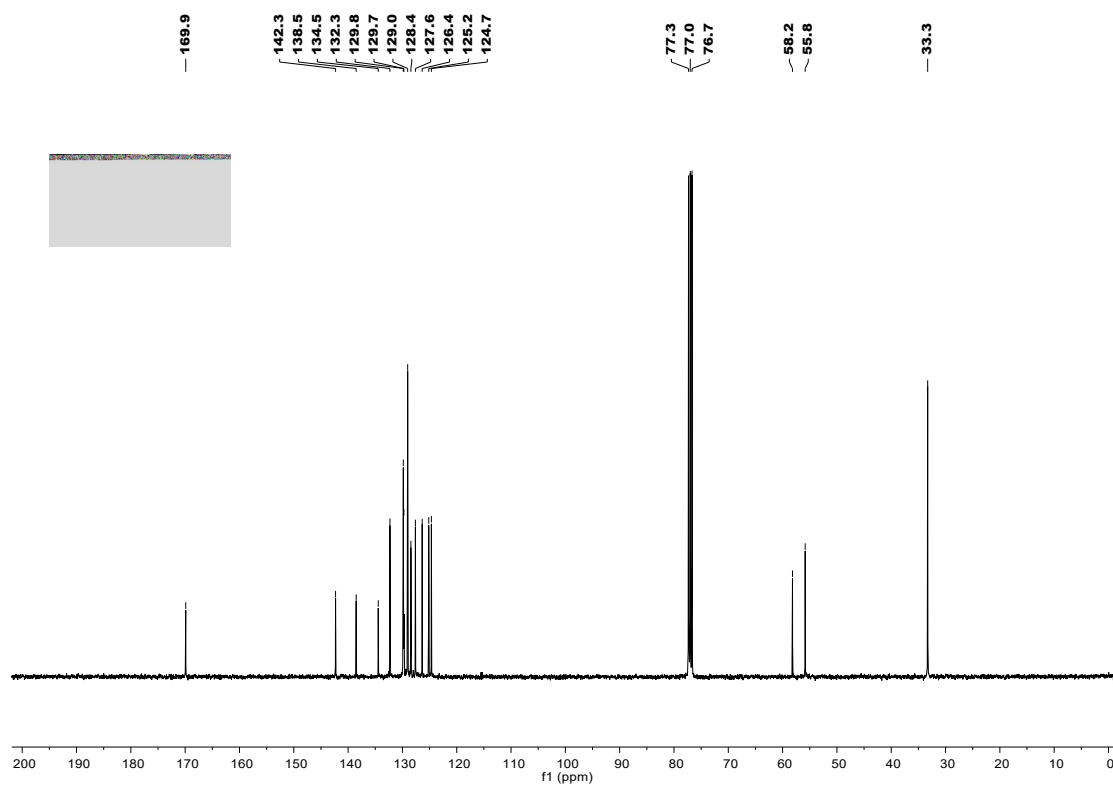

<sup>1</sup>H NMR spectrum of compound (2h)

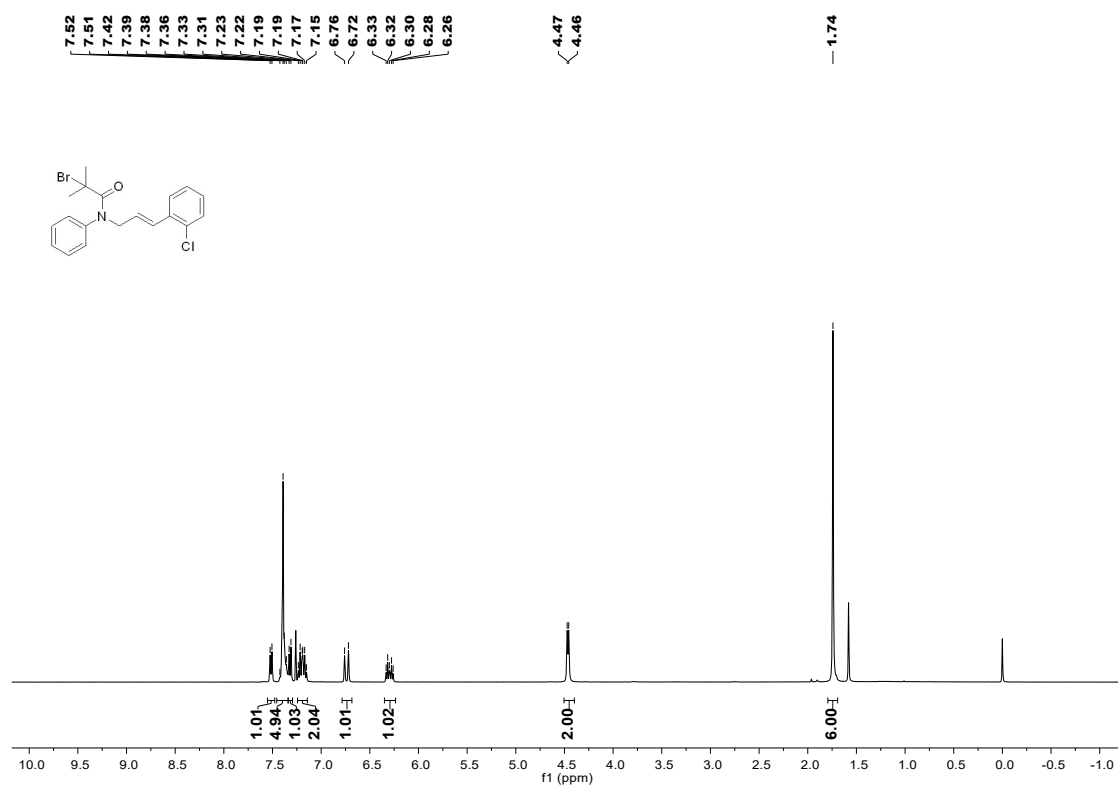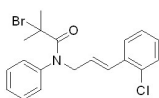

<sup>13</sup>C NMR spectrum of compound (2h)

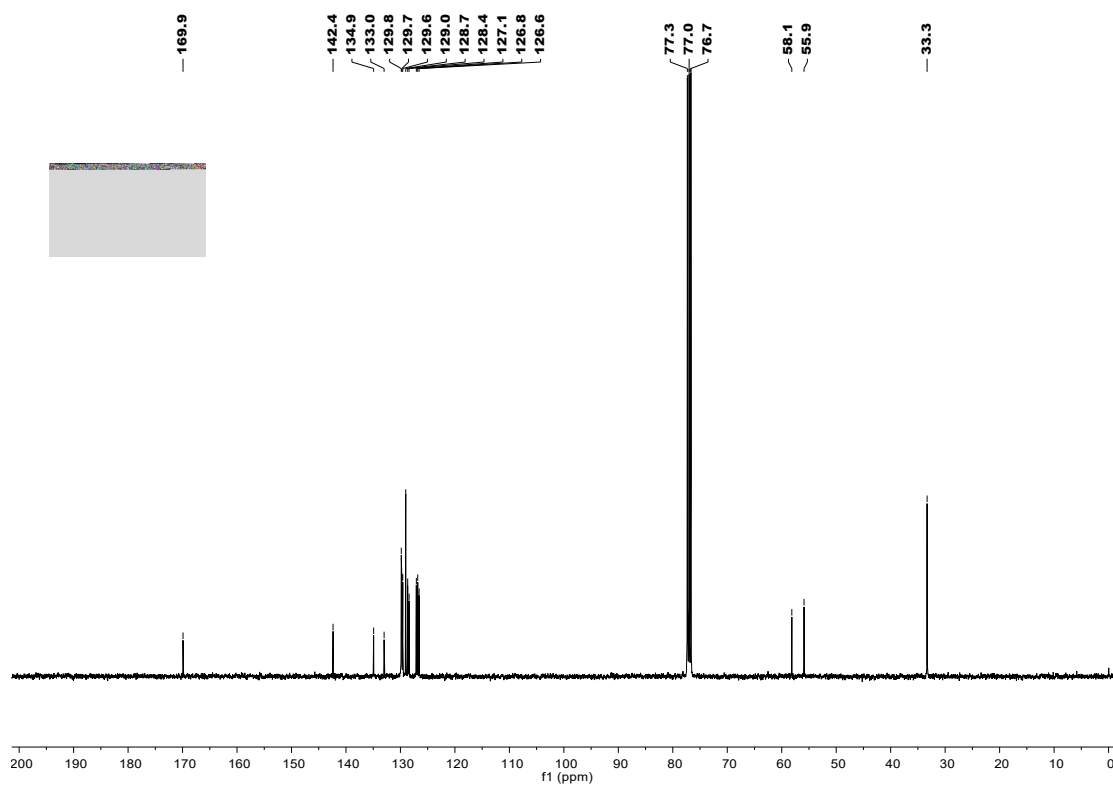

<sup>1</sup>H NMR spectrum of compound (2i)

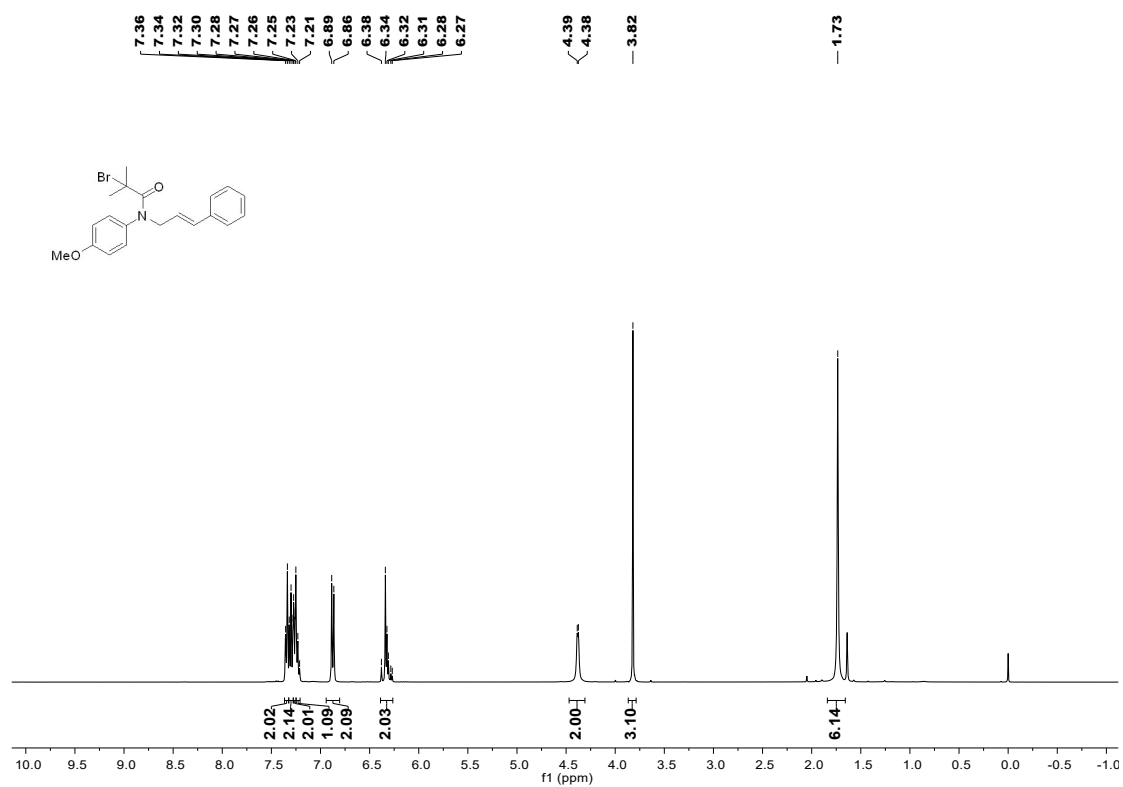



<sup>13</sup>C NMR spectrum of compound (2i)

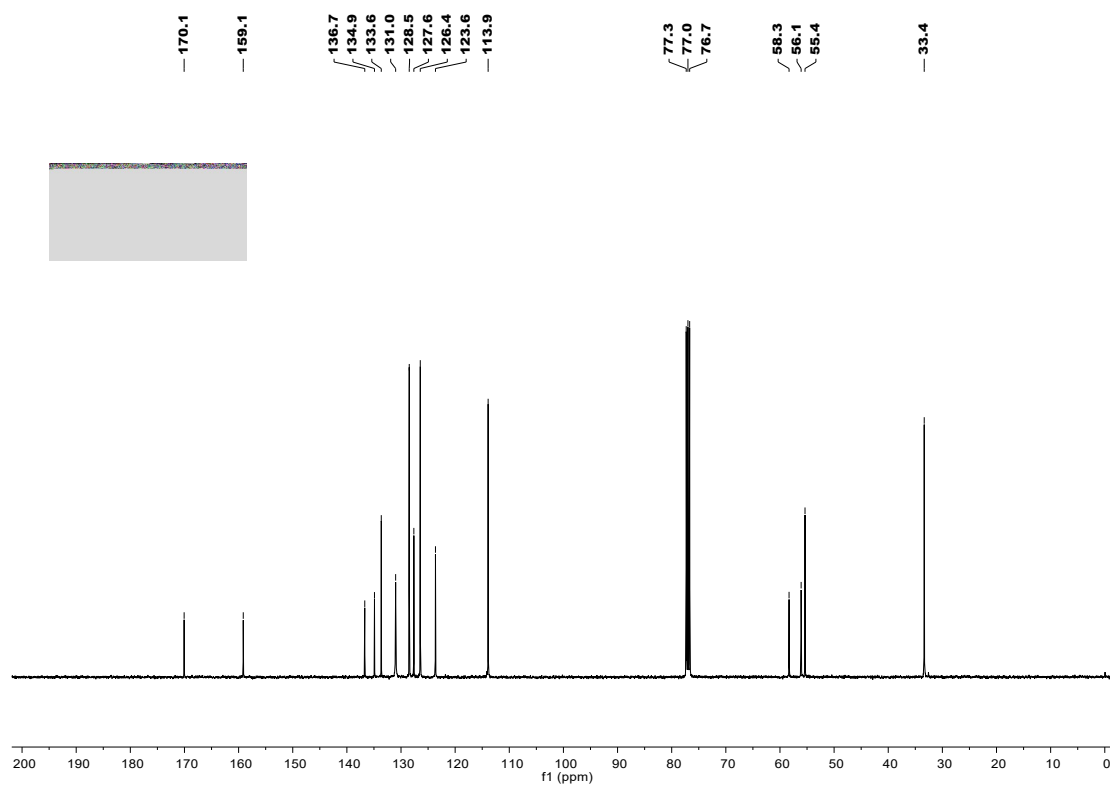

<sup>1</sup>H NMR spectrum of compound (2j)

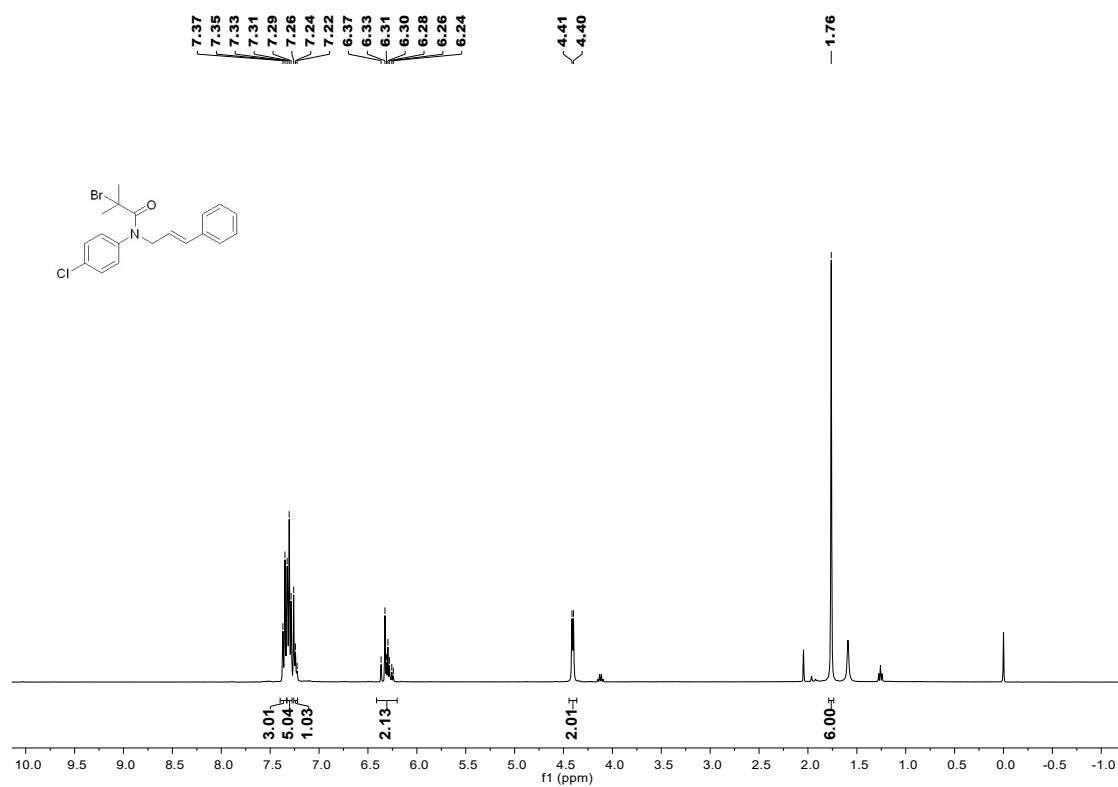

<sup>13</sup>C NMR spectrum of compound (2j)

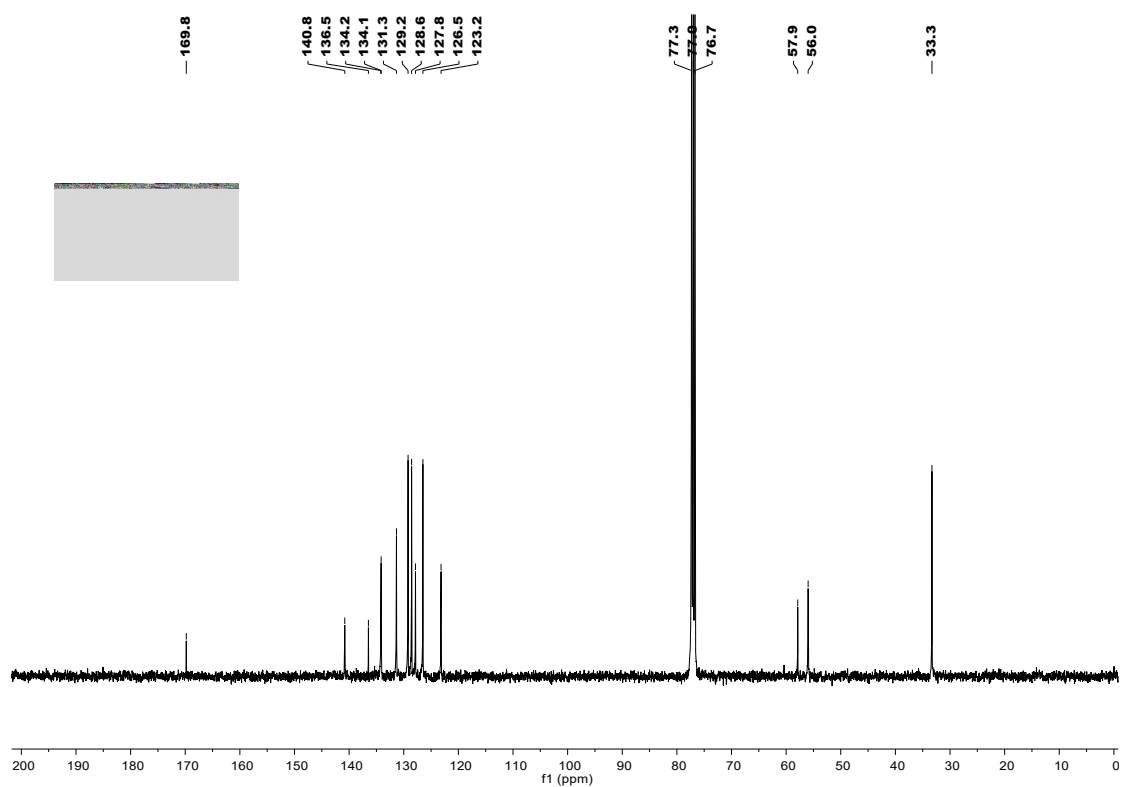

<sup>1</sup>H NMR spectrum of compound (2k)

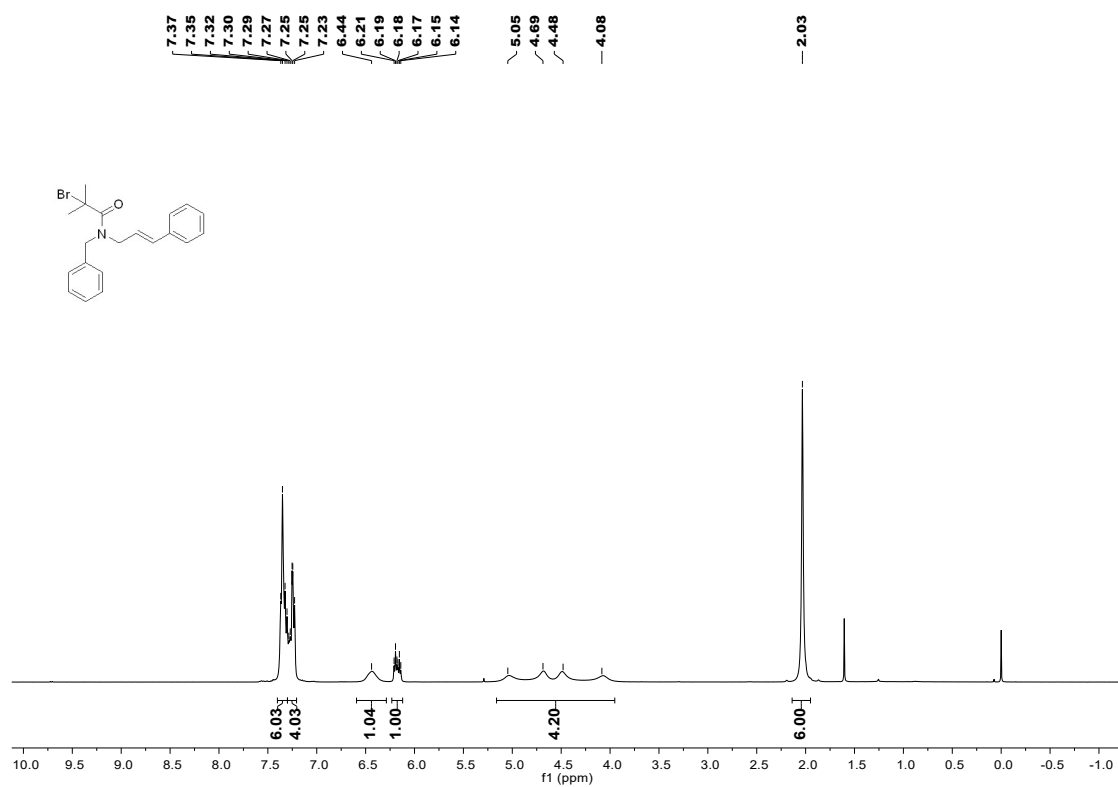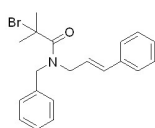

<sup>13</sup>C NMR spectrum of compound (2k)

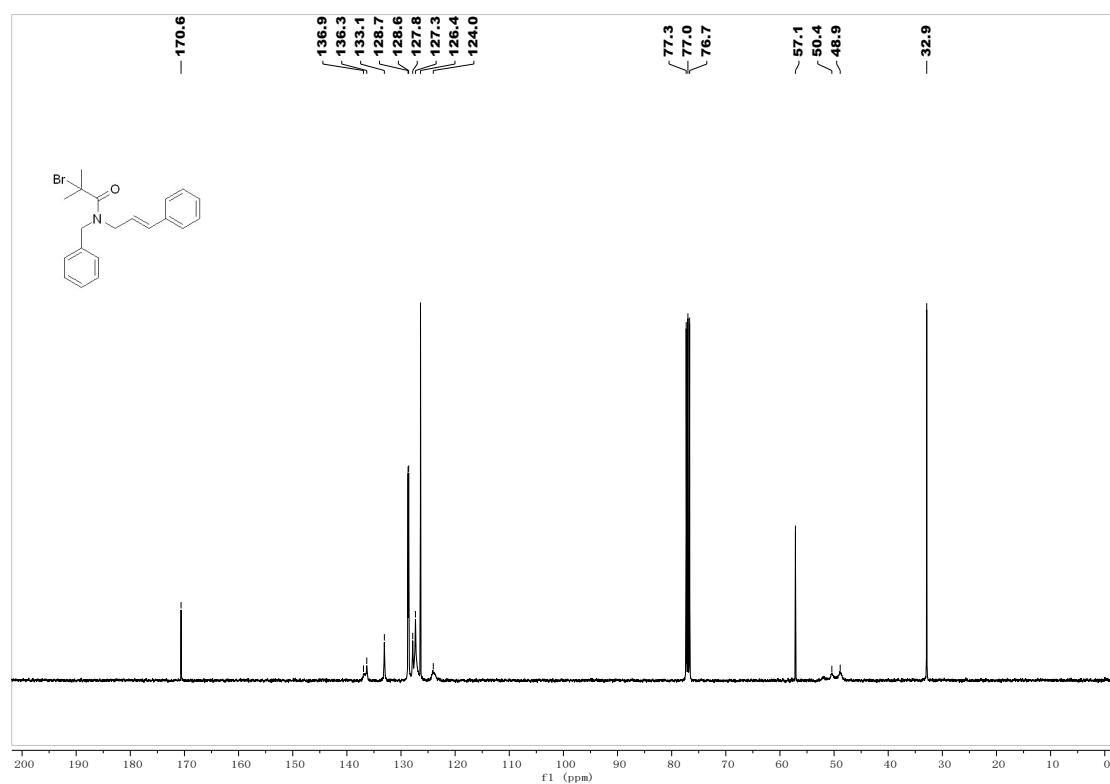

<sup>1</sup>H NMR spectrum of compound (2l)

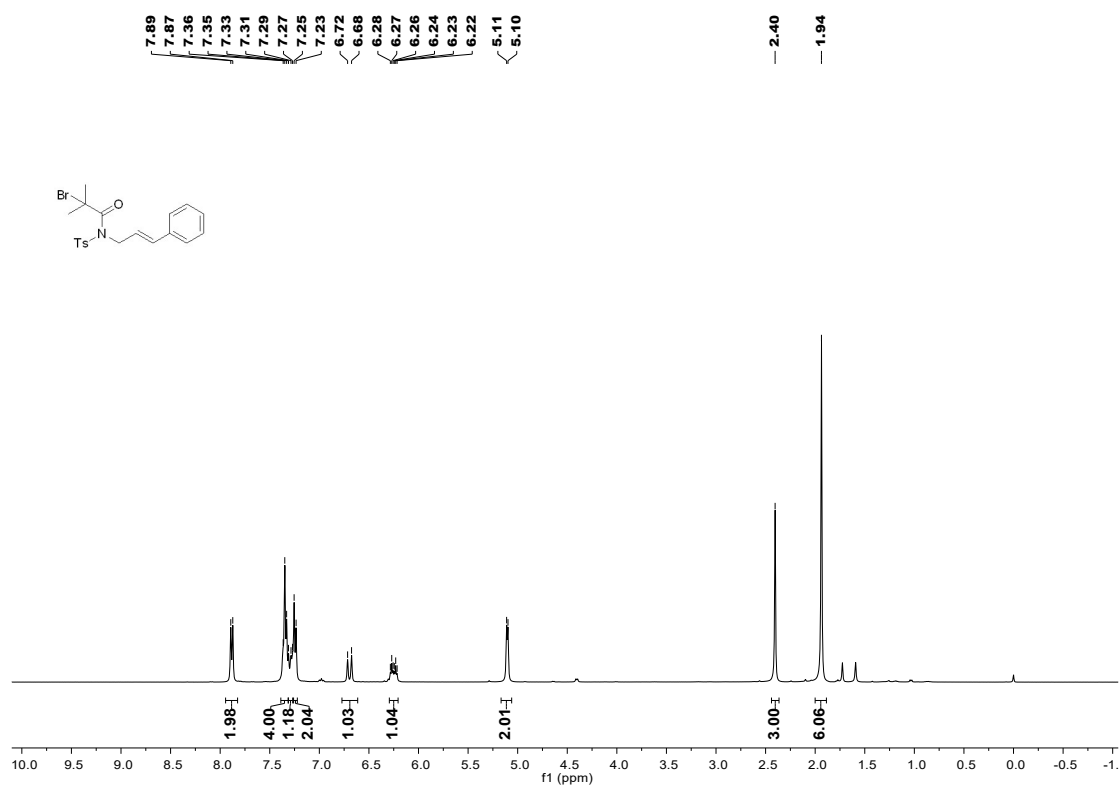

<sup>13</sup>C NMR spectrum of compound (2l)

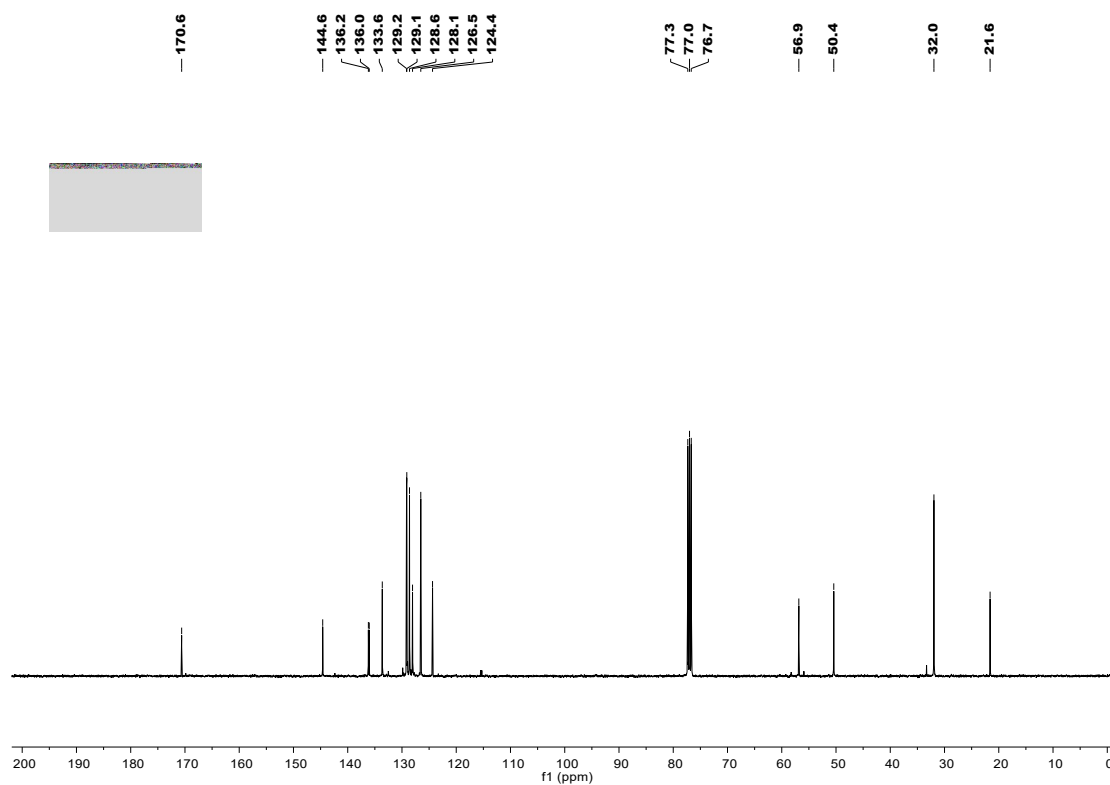

<sup>1</sup>H NMR spectrum of compound (2m)

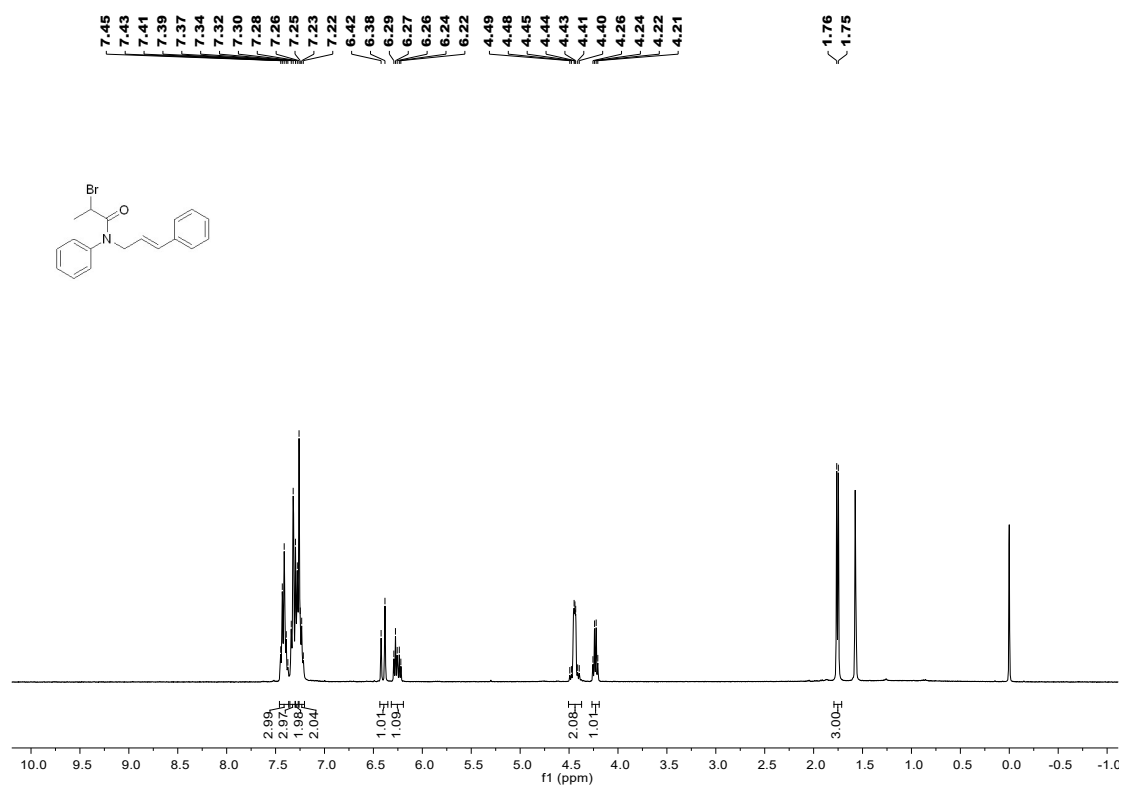

<sup>13</sup>C NMR spectrum of compound (2m)

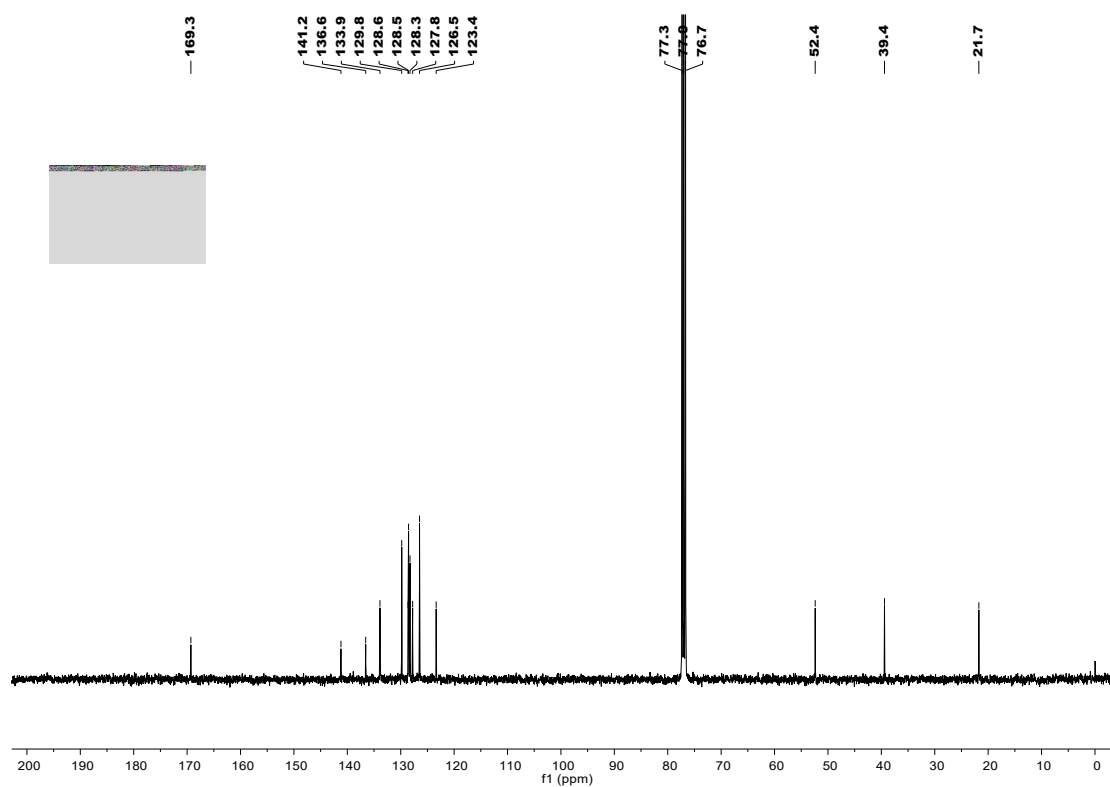

<sup>1</sup>H NMR spectrum of compound (3aa)

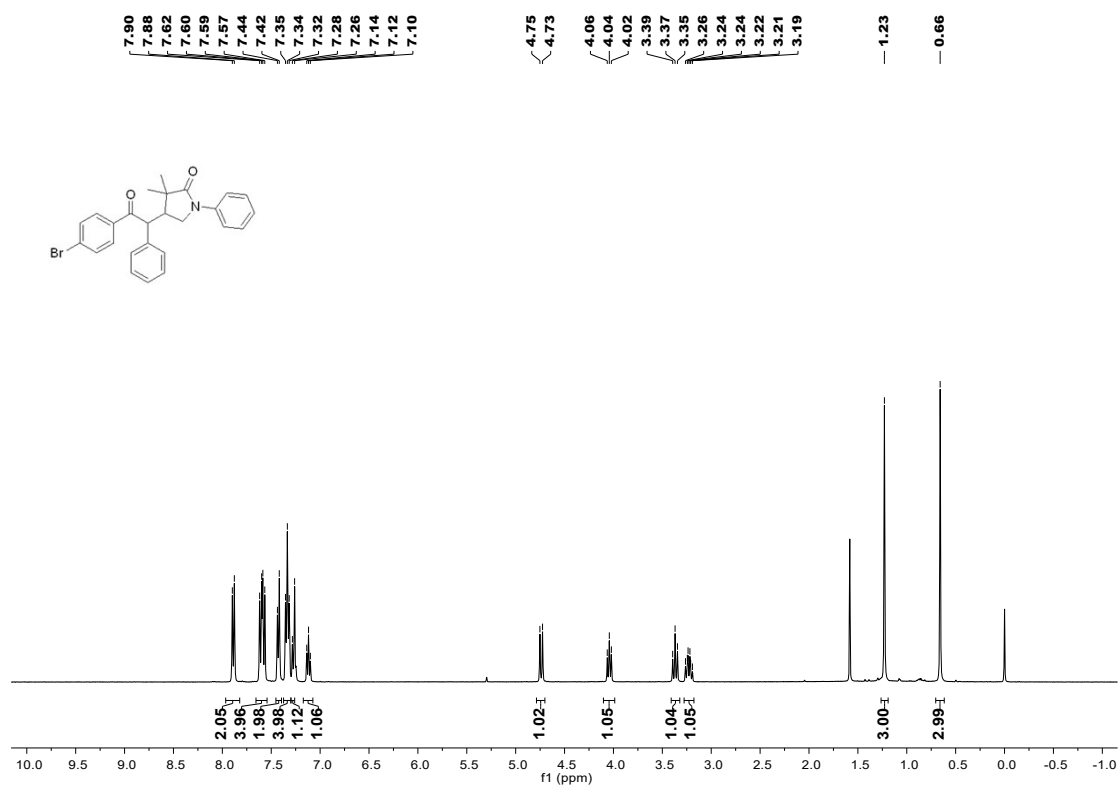

<sup>13</sup>C NMR spectrum of compound (3aa)

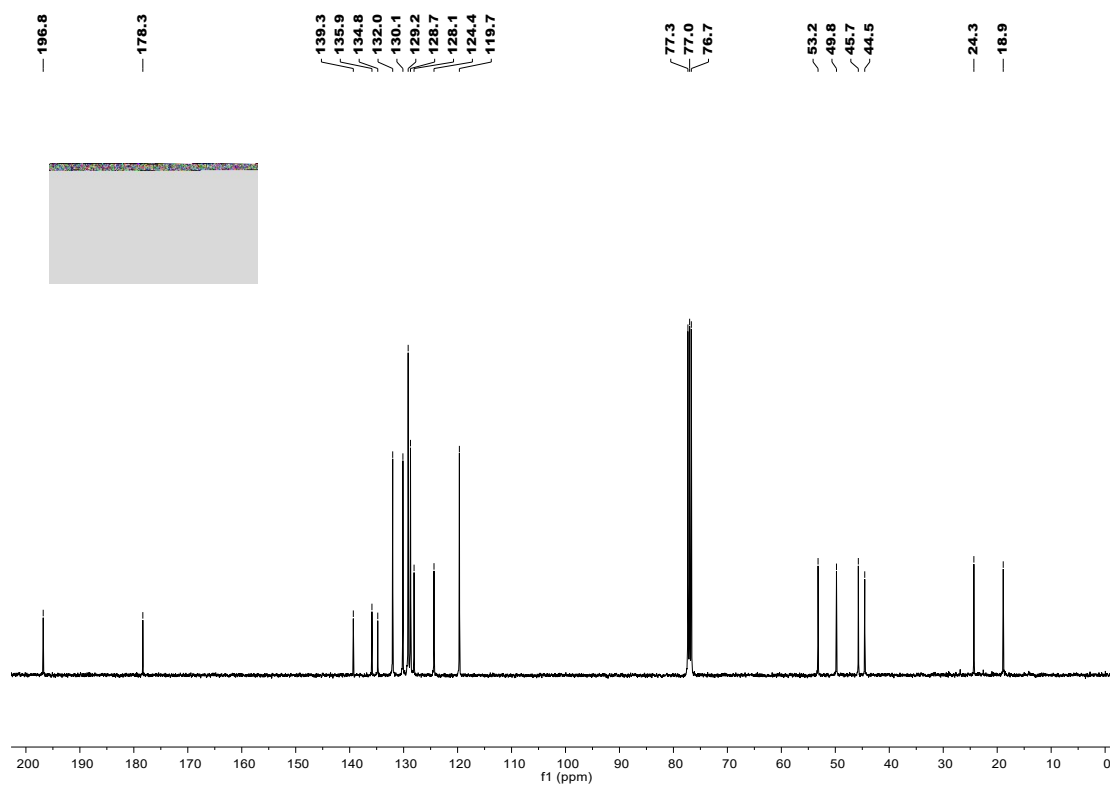

<sup>1</sup>H NMR spectrum of compound (3ba)

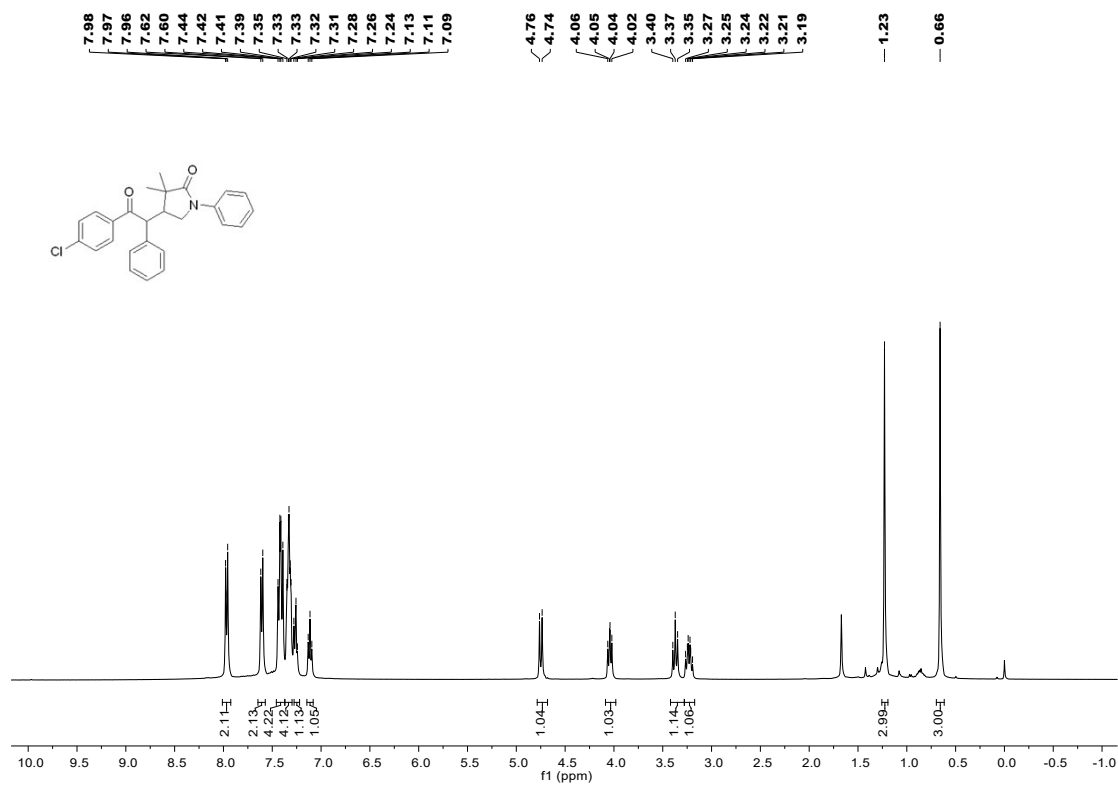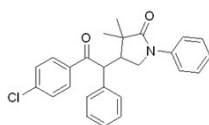

<sup>13</sup>C NMR spectrum of compound (3ba)

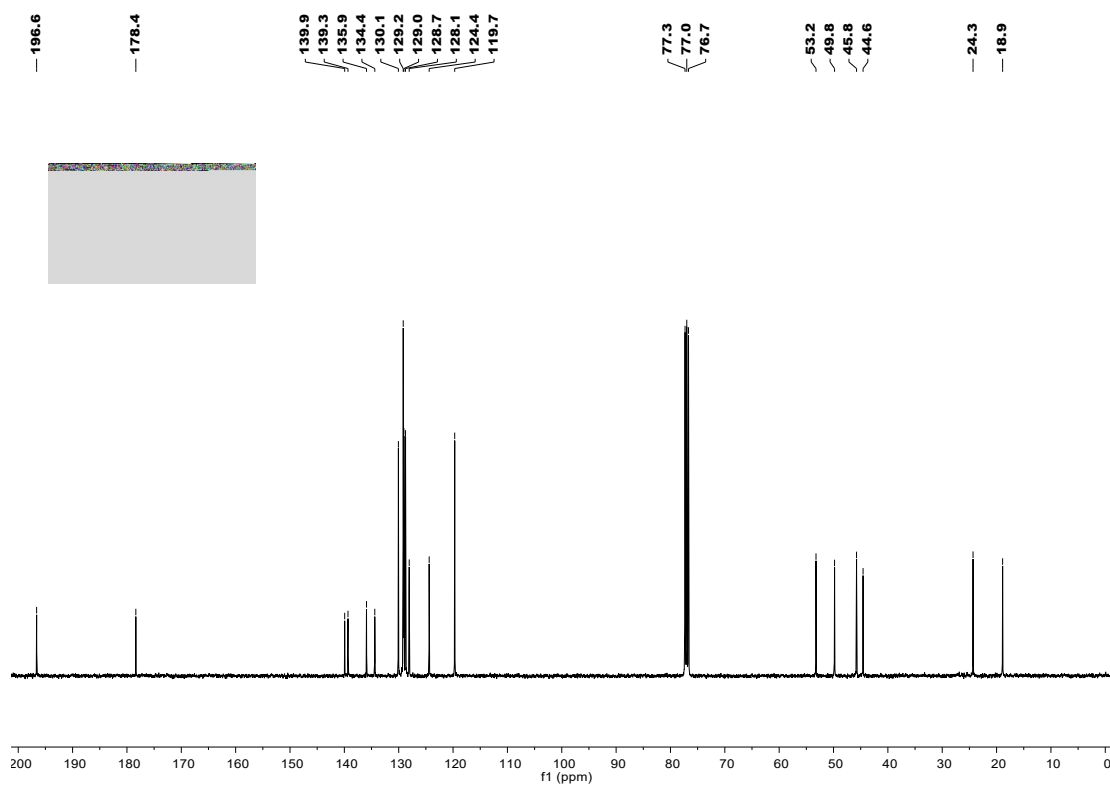

<sup>1</sup>H NMR spectrum of compound (3ca)

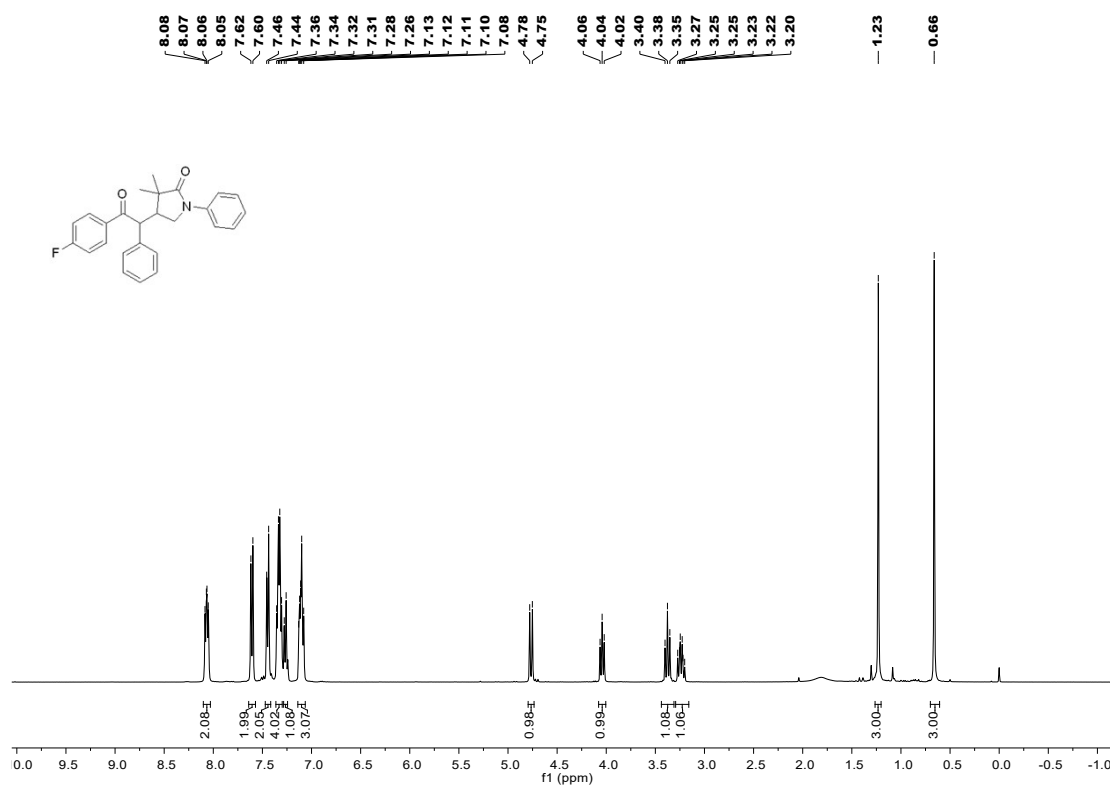

<sup>13</sup>C NMR spectrum of compound (3ca)

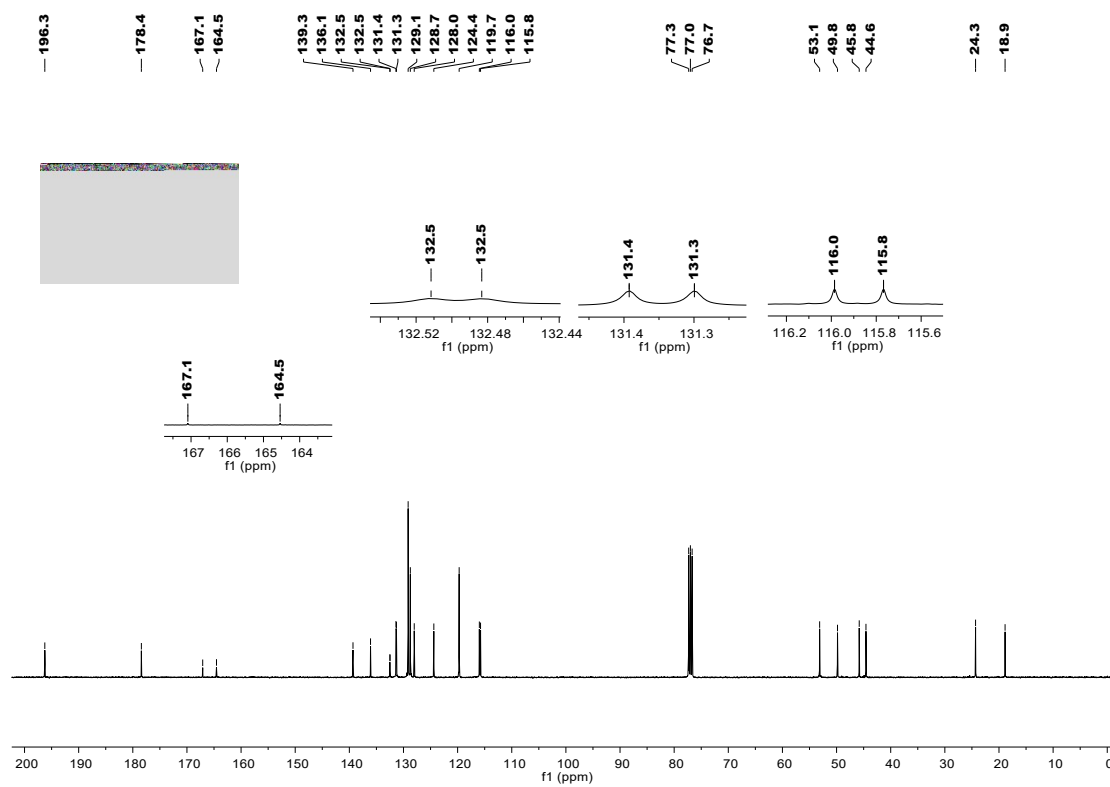

<sup>19</sup>F NMR spectrum of compound (3ca)

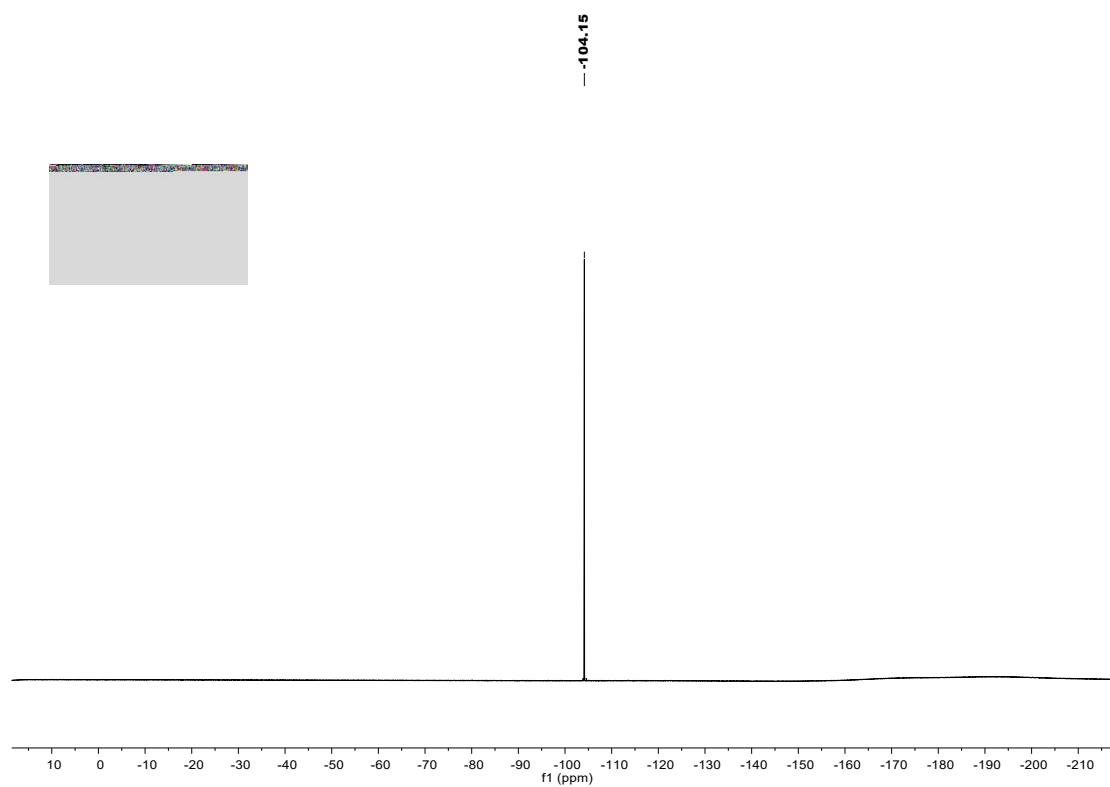

I



<sup>1</sup>H NMR spectrum of compound (3da)

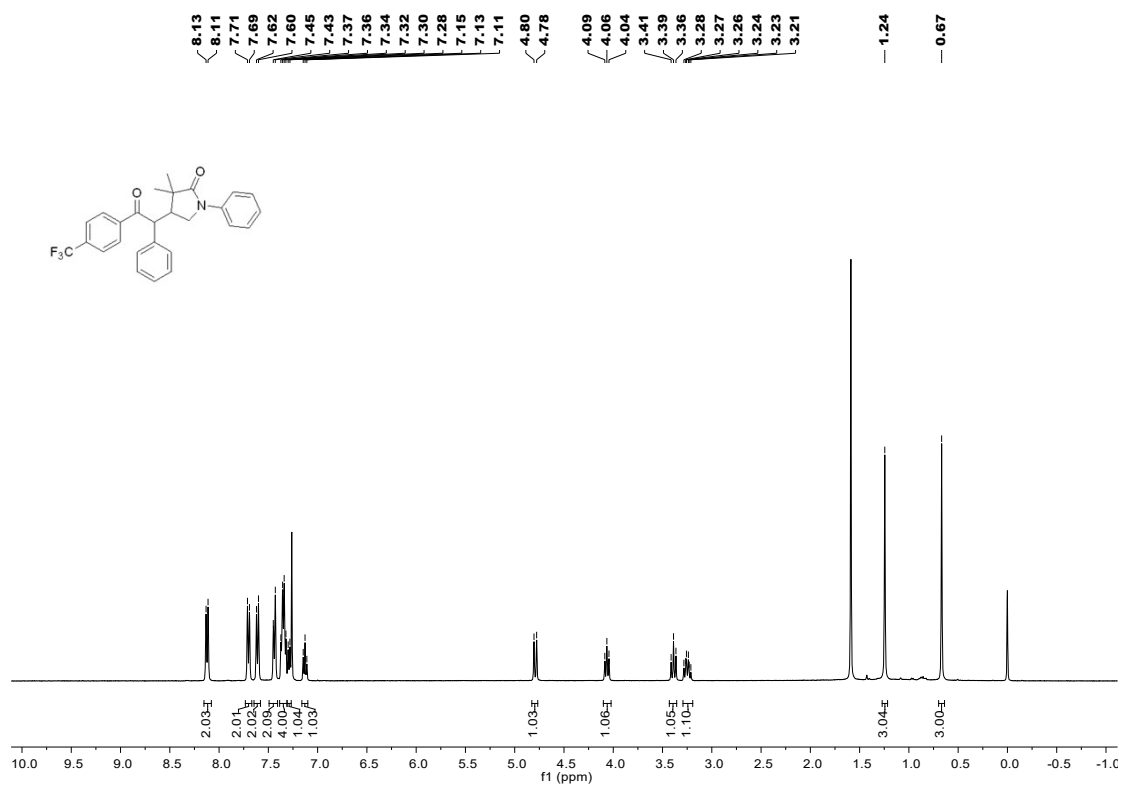

<sup>13</sup>C NMR spectrum of compound (3da)

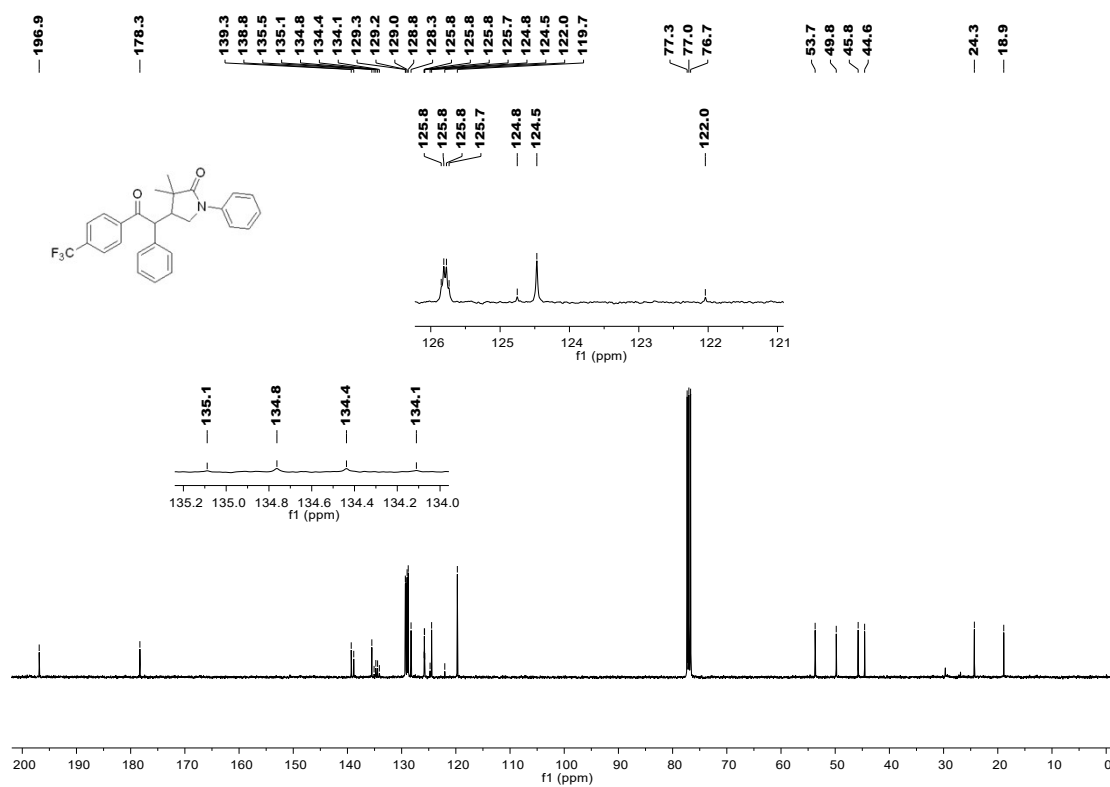

<sup>19</sup>F NMR spectrum of compound (3da)

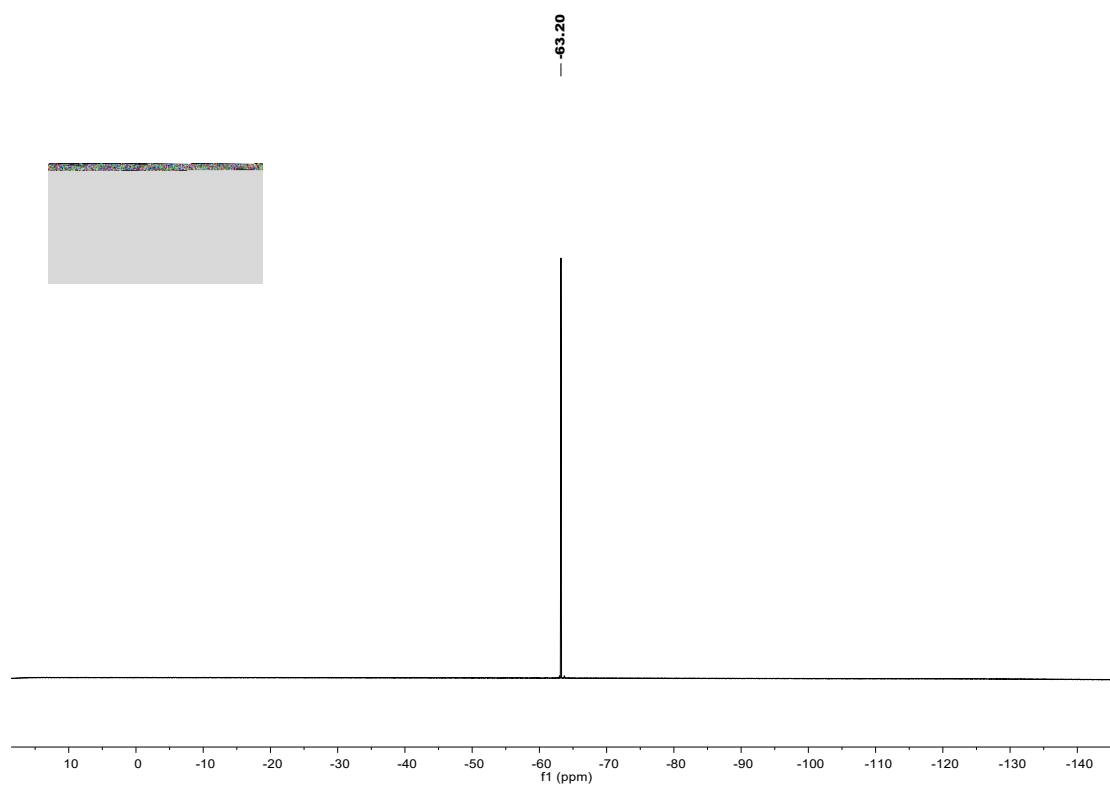

<sup>1</sup>H NMR spectrum of compound (3ea)

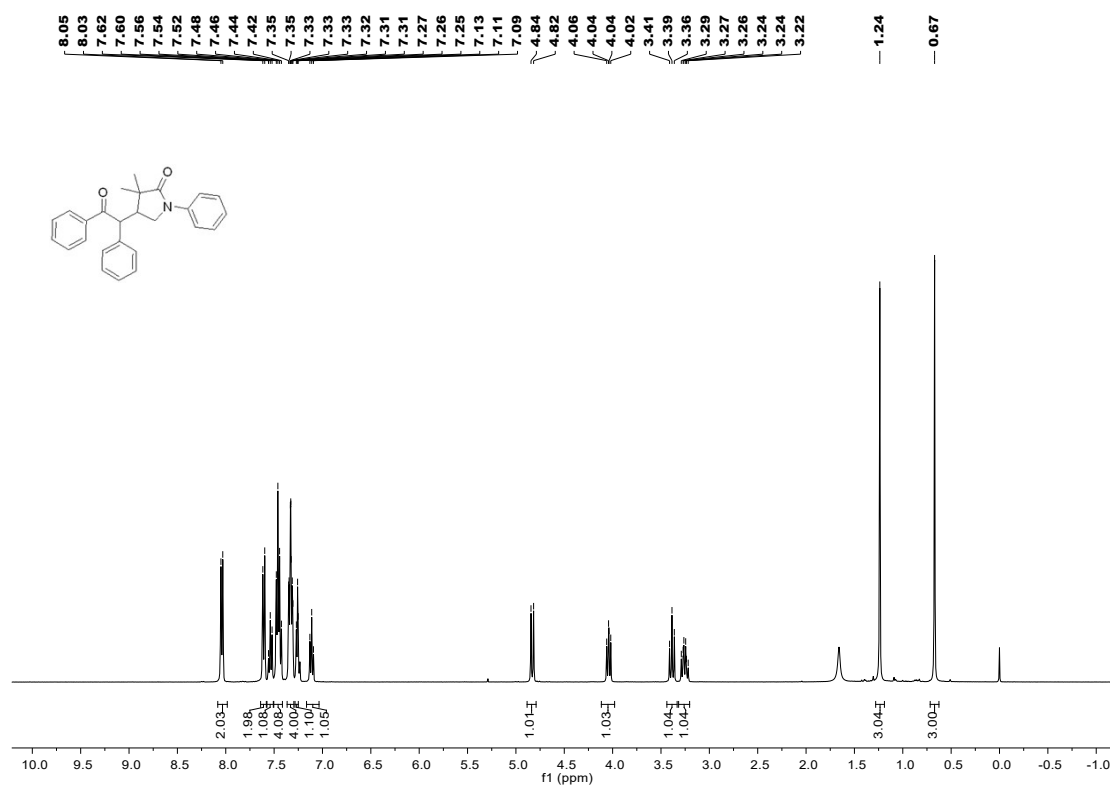

<sup>13</sup>C NMR spectrum of compound (3ea)

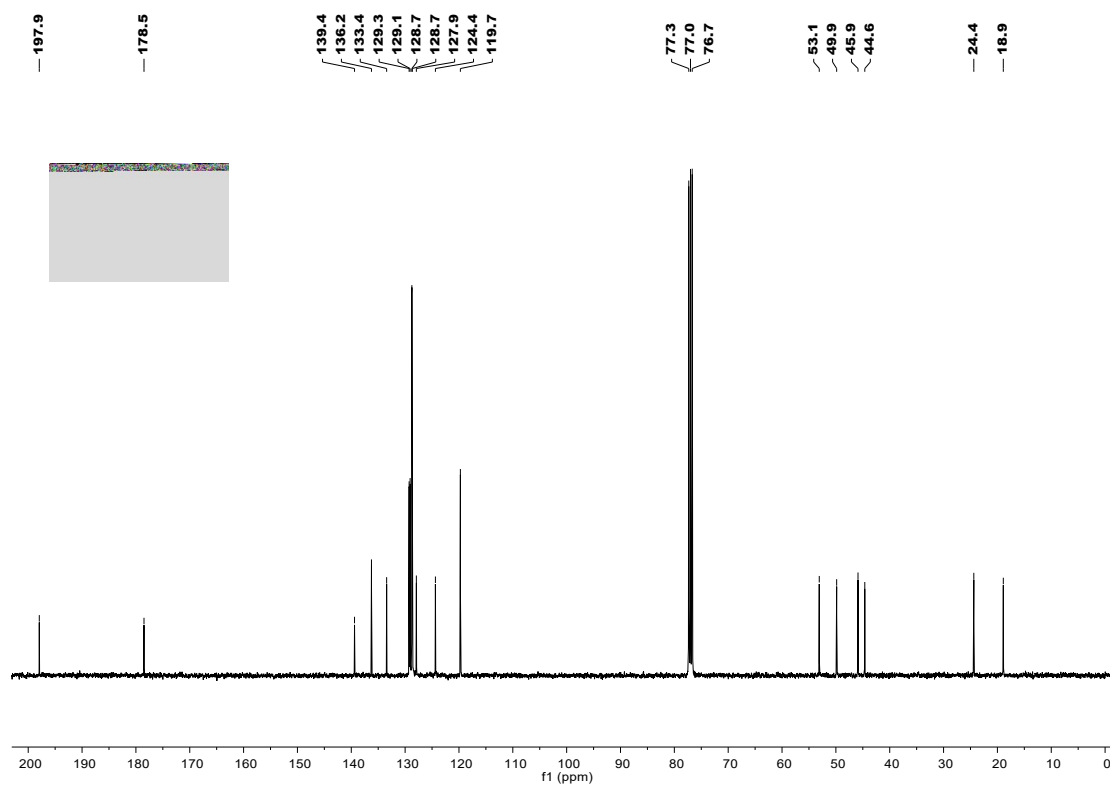

<sup>1</sup>H NMR spectrum of compound (3fa)

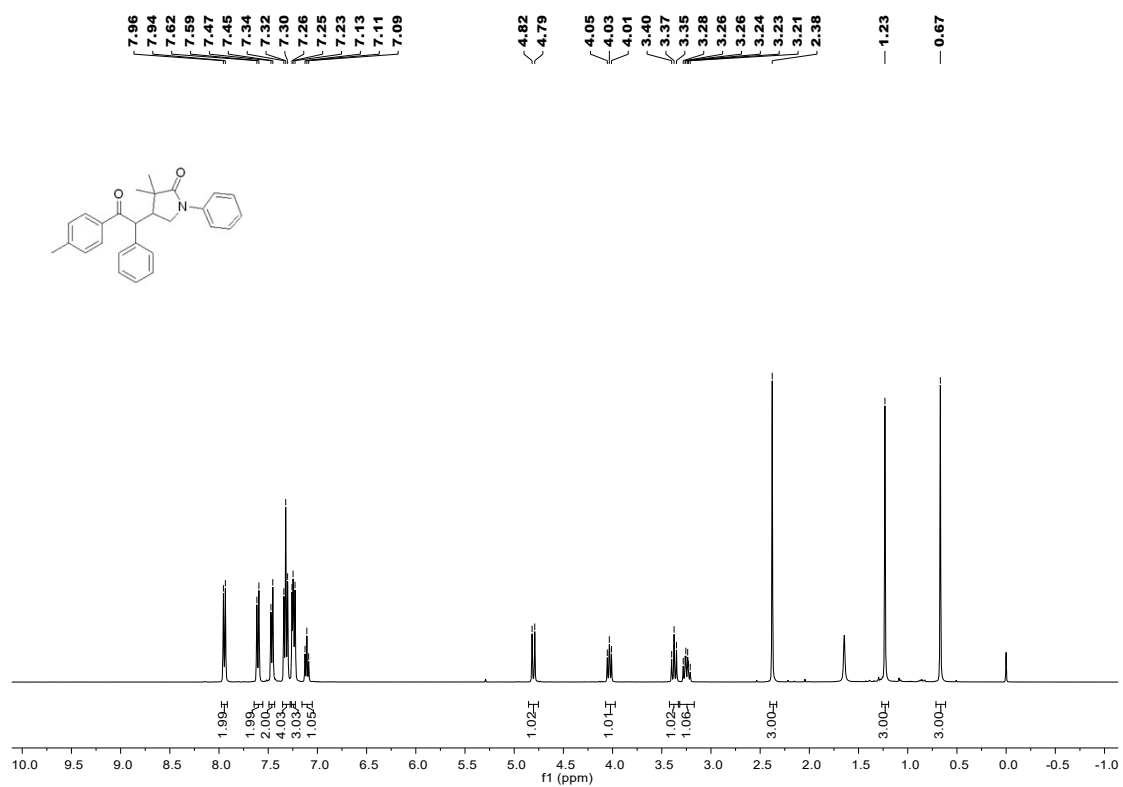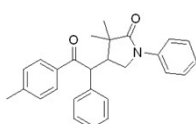

<sup>13</sup>C NMR spectrum of compound (3fa)

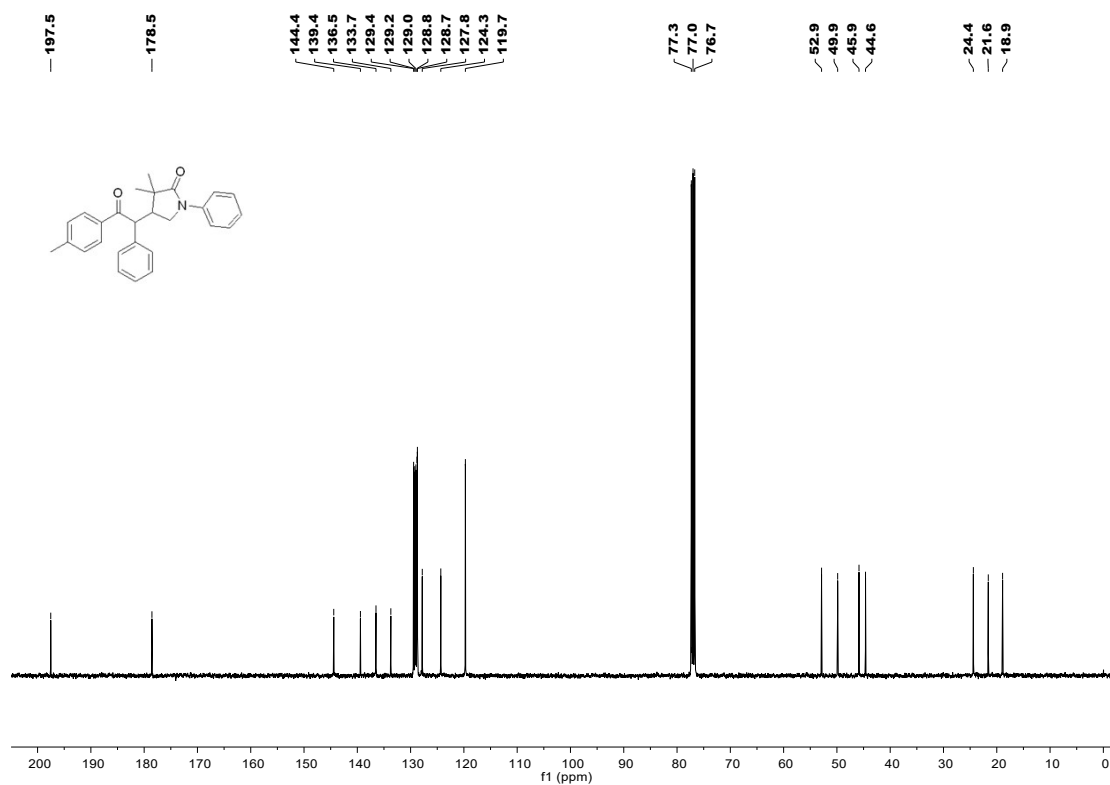

<sup>1</sup>H NMR spectrum of compound (3ga)

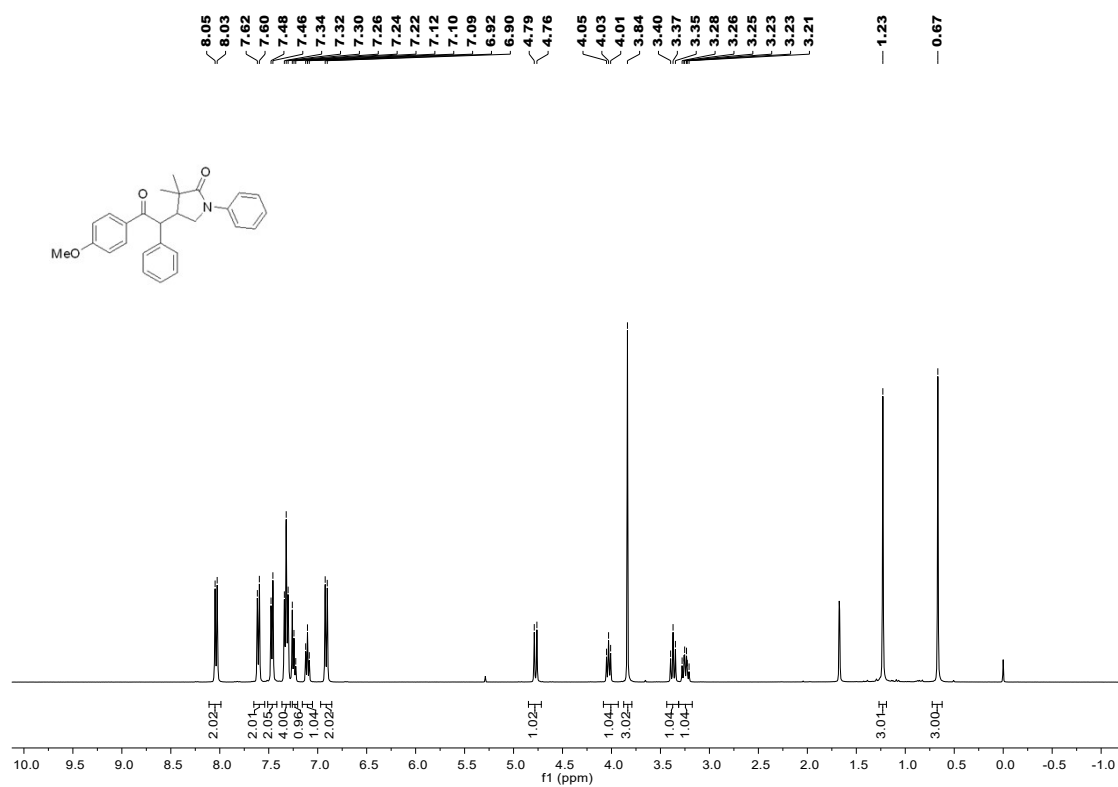

<sup>13</sup>C NMR spectrum of compound (3ga)

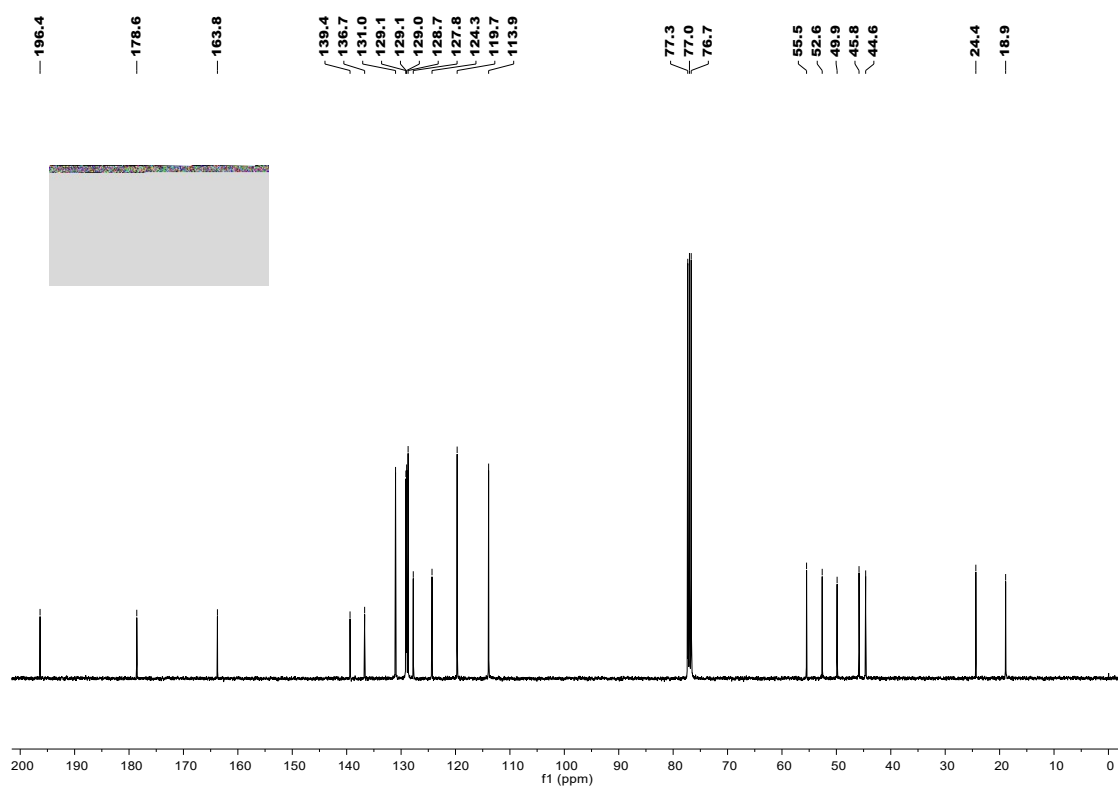

<sup>1</sup>H NMR spectrum of compound (3ha)

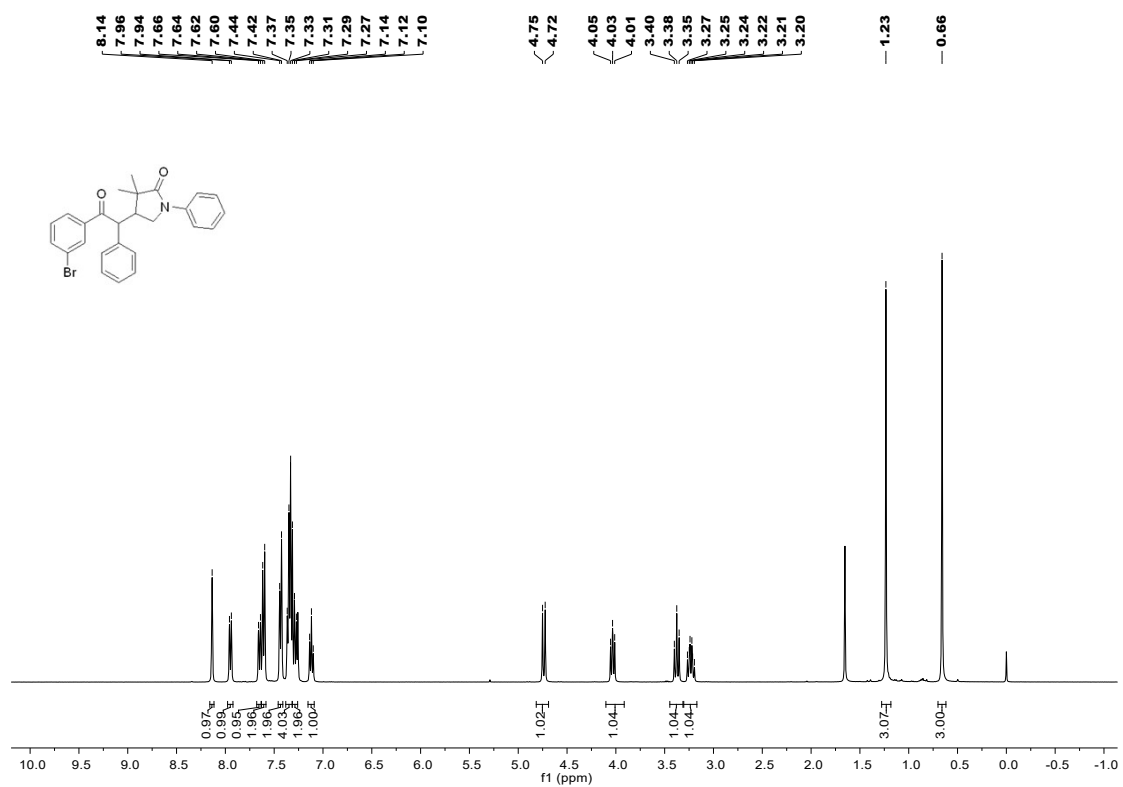

<sup>13</sup>C NMR spectrum of compound (3ha)

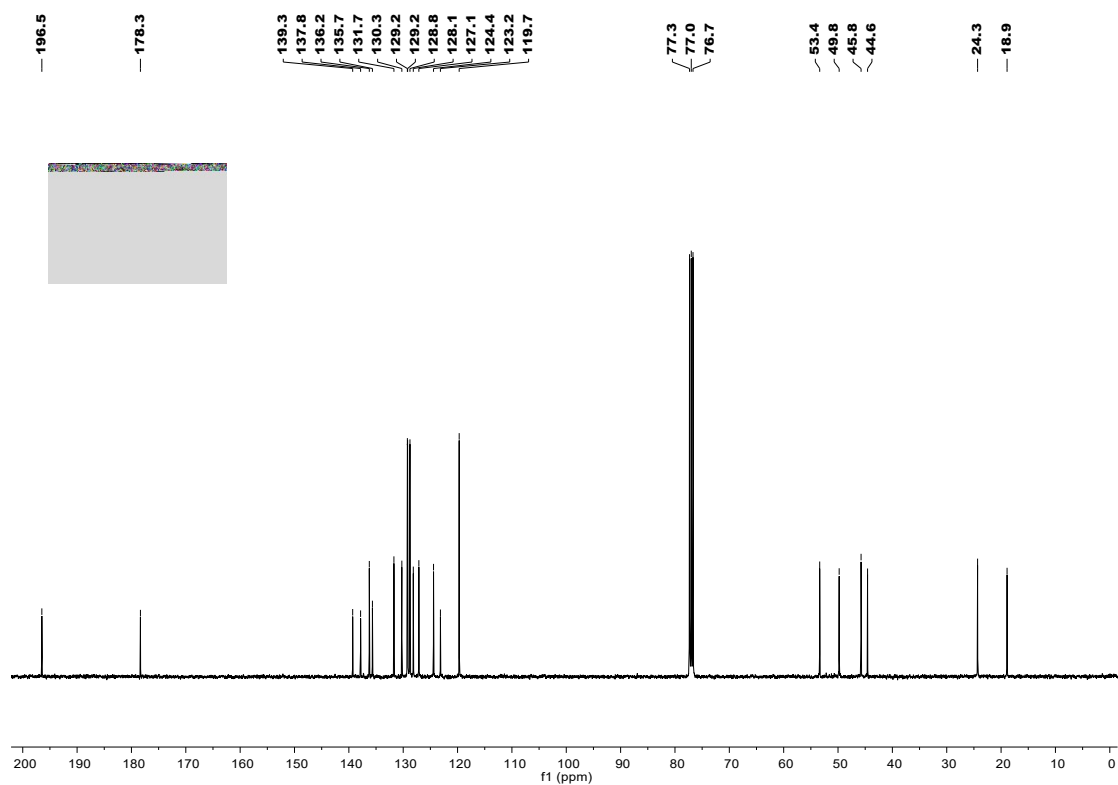

<sup>1</sup>H NMR spectrum of compound (3ia)

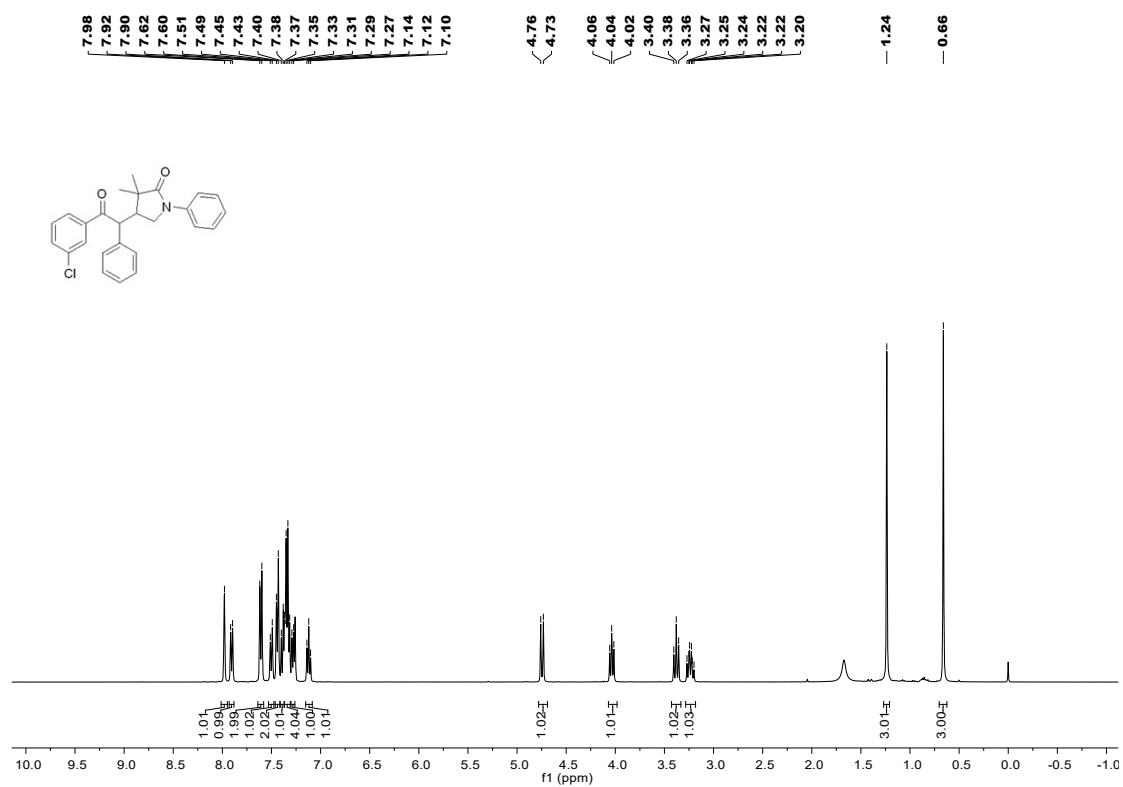

<sup>13</sup>C NMR spectrum of compound (3ia)

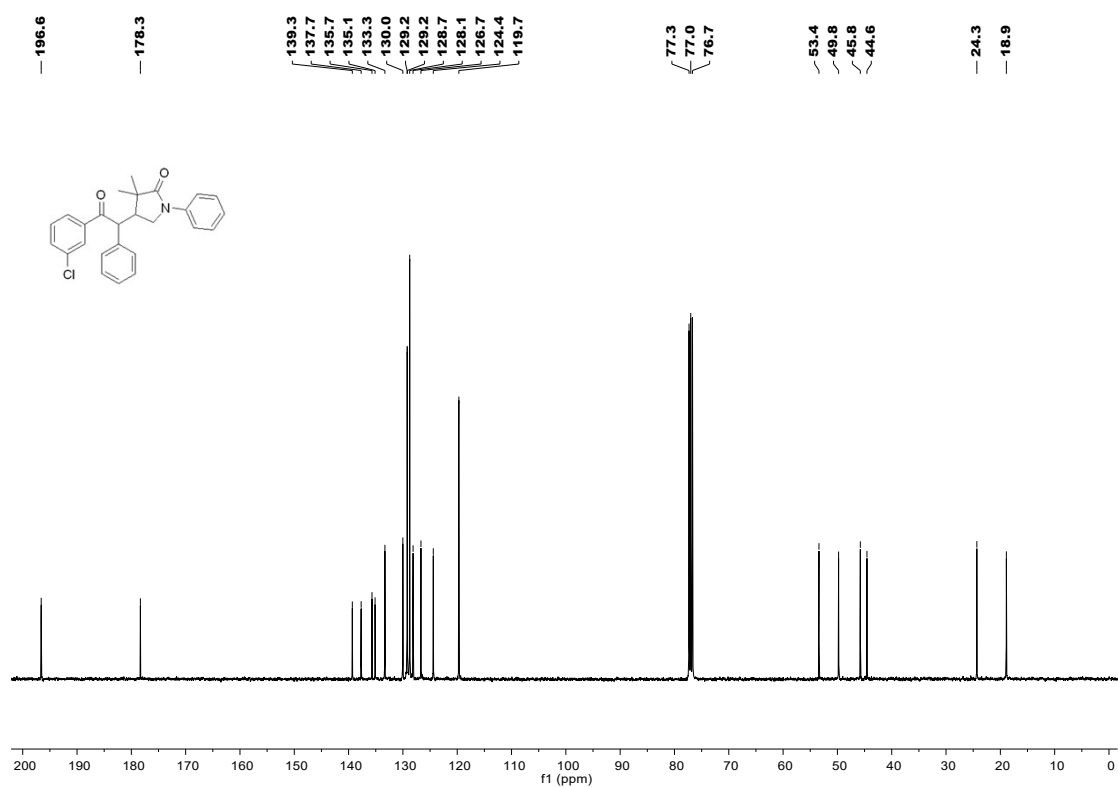

<sup>1</sup>H NMR spectrum of compound (3ja)

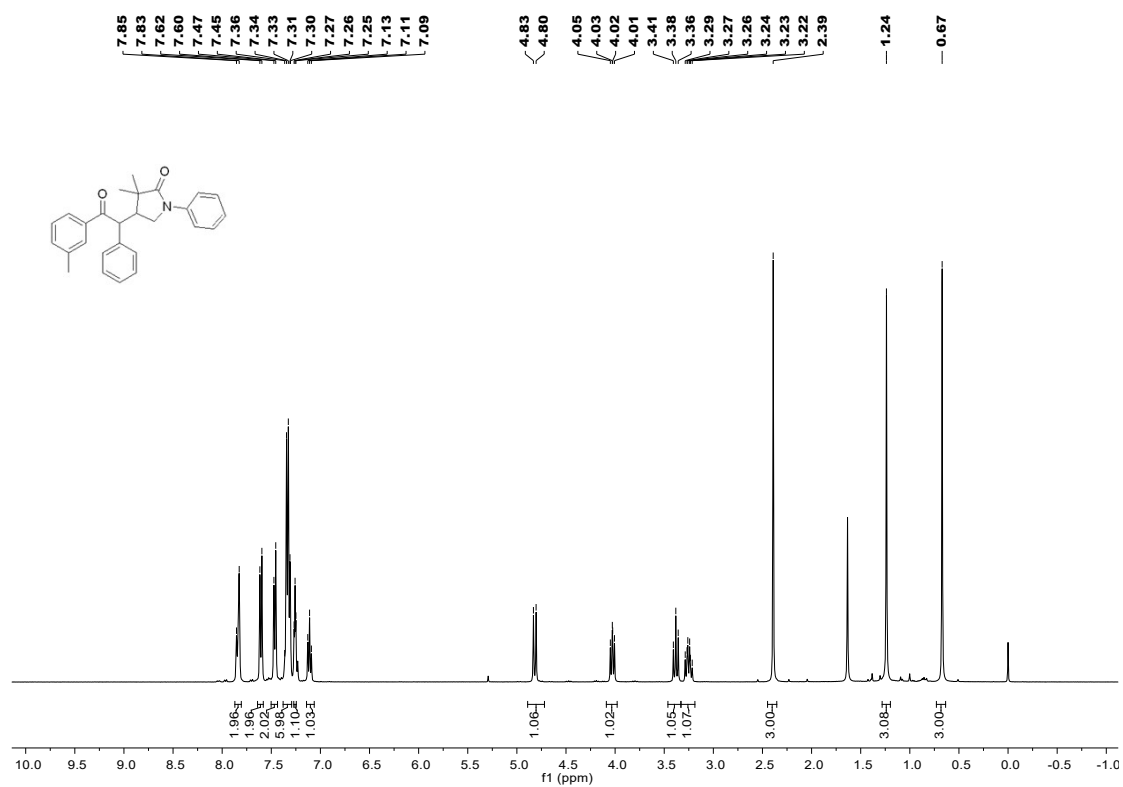

<sup>13</sup>C NMR spectrum of compound (3ja)

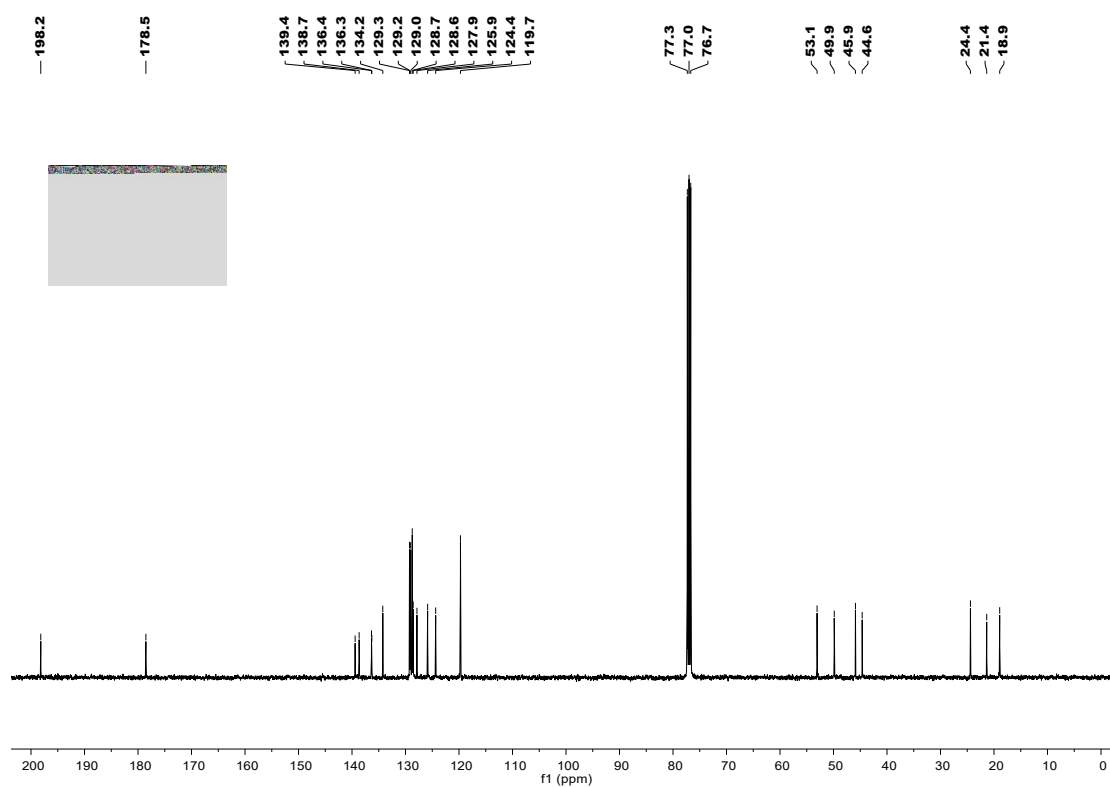

<sup>1</sup>H NMR spectrum of compound (3ka)

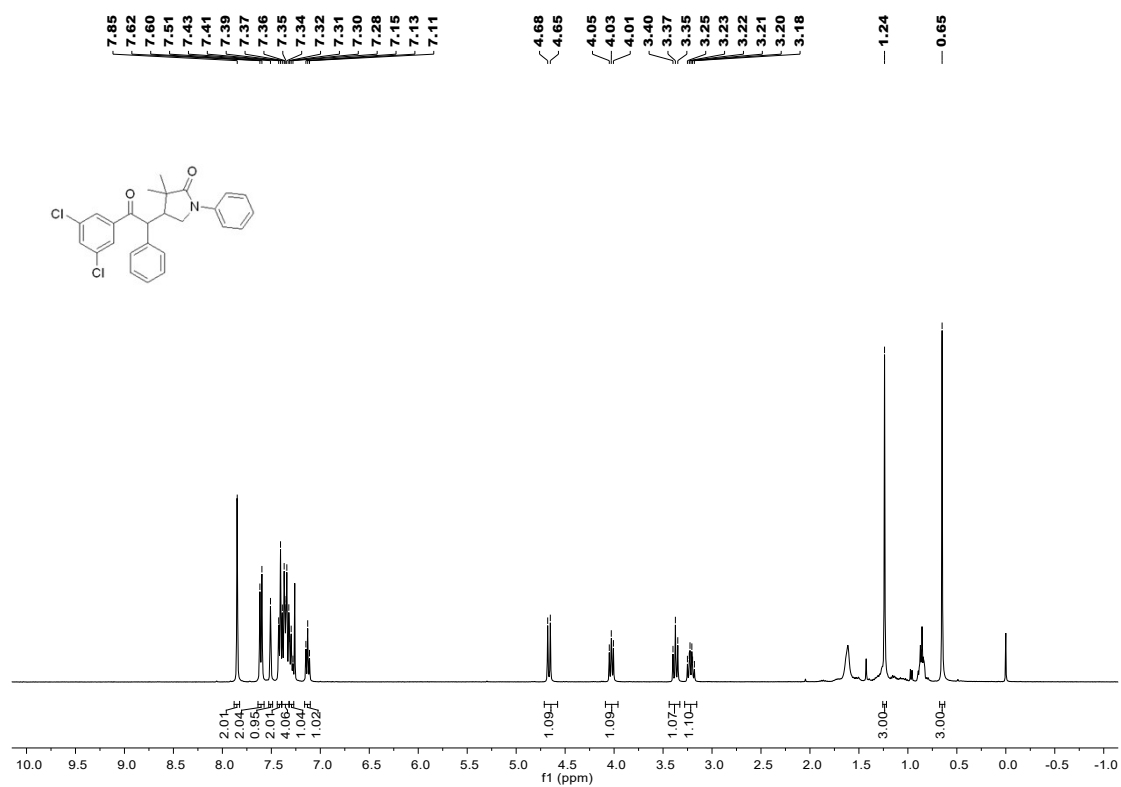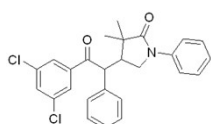





<sup>13</sup>C NMR spectrum of compound (3la)

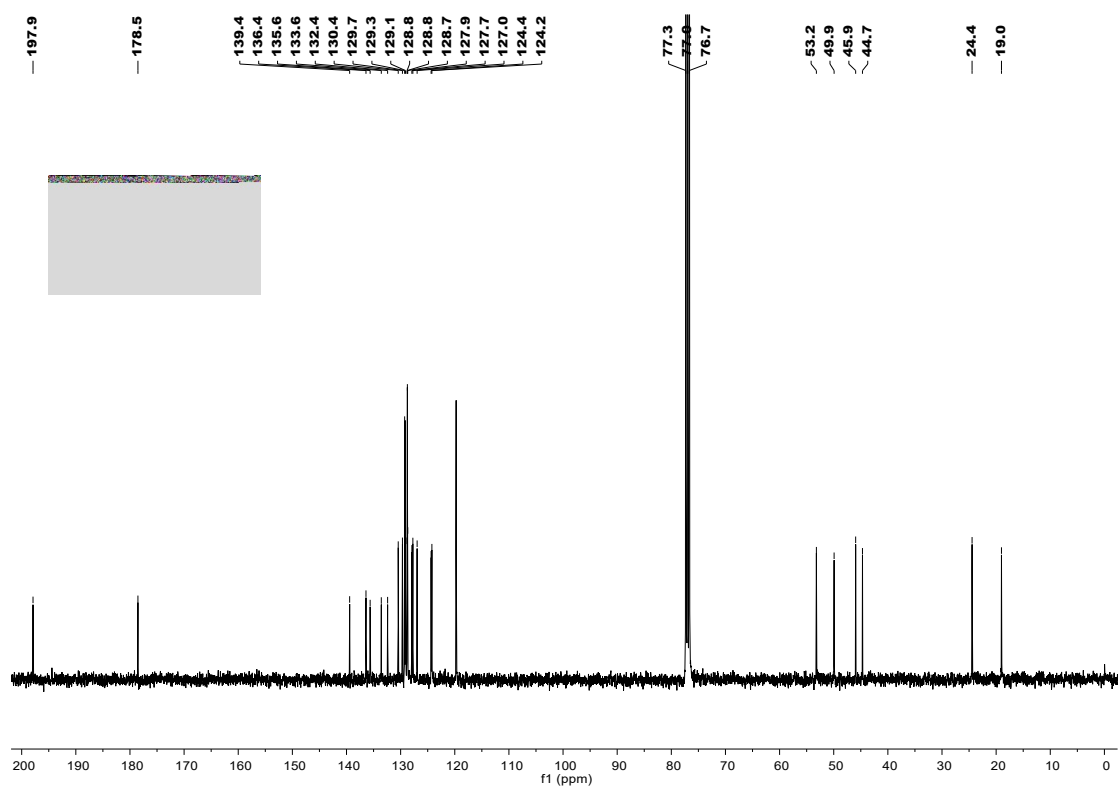

<sup>1</sup>H NMR spectrum of compound (3ma)

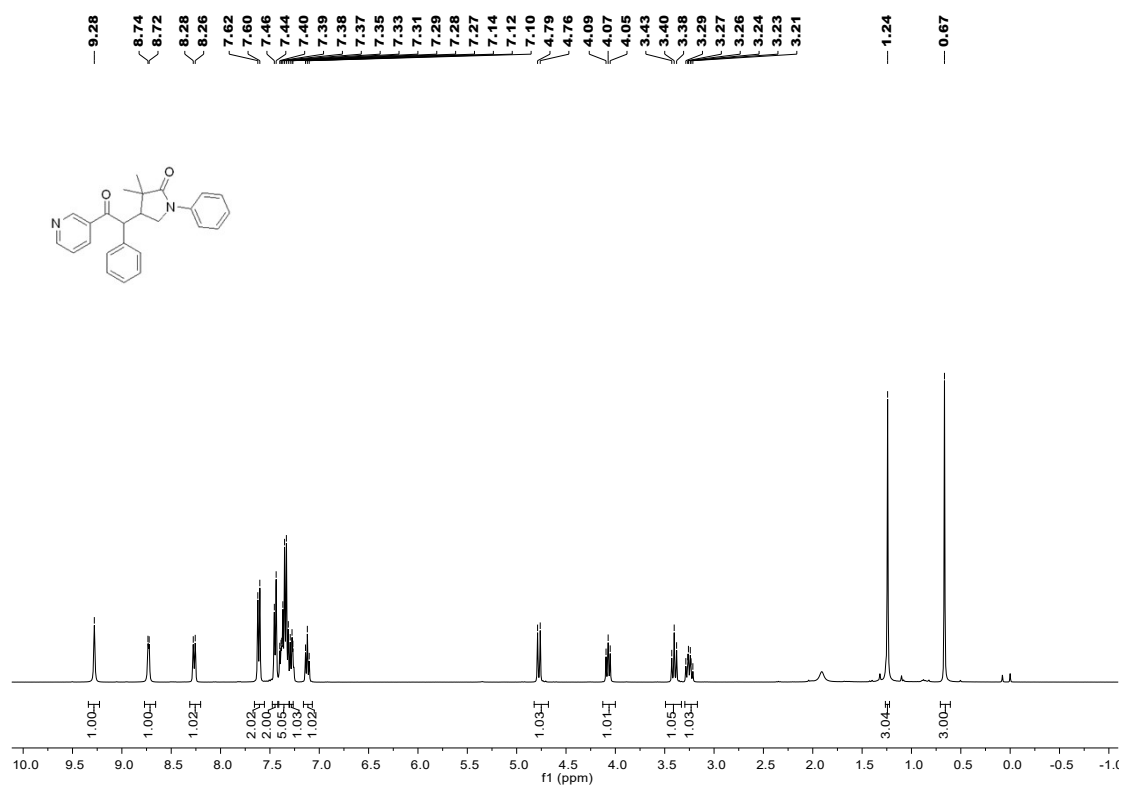

<sup>13</sup>C NMR spectrum of compound (3ma)

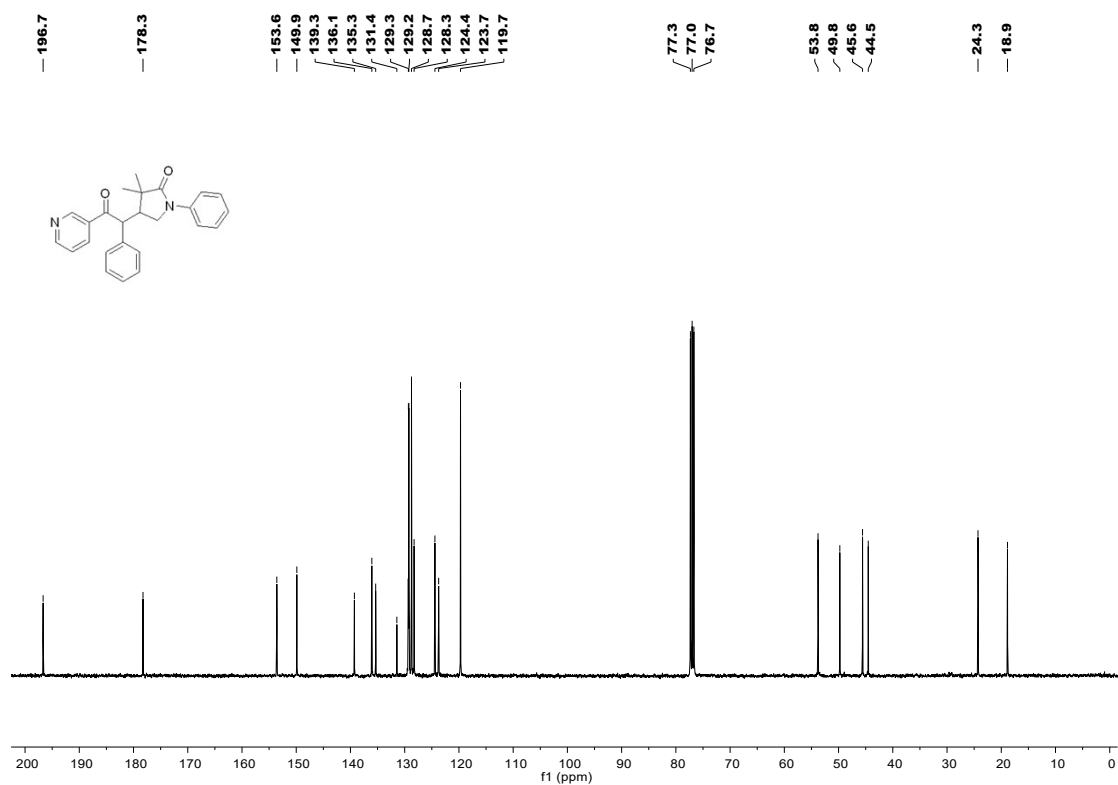

<sup>1</sup>H NMR spectrum of compound (3na)

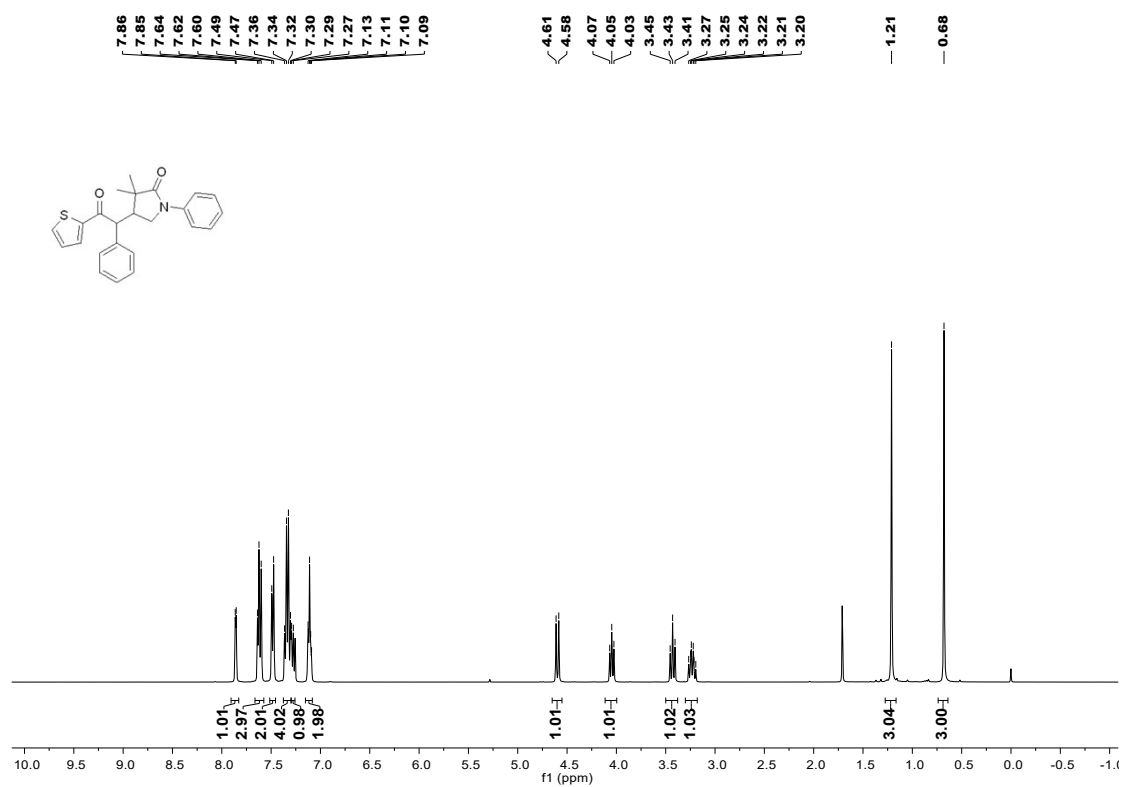

$^{13}\text{C}$  NMR spectrum of compound (**3na**)

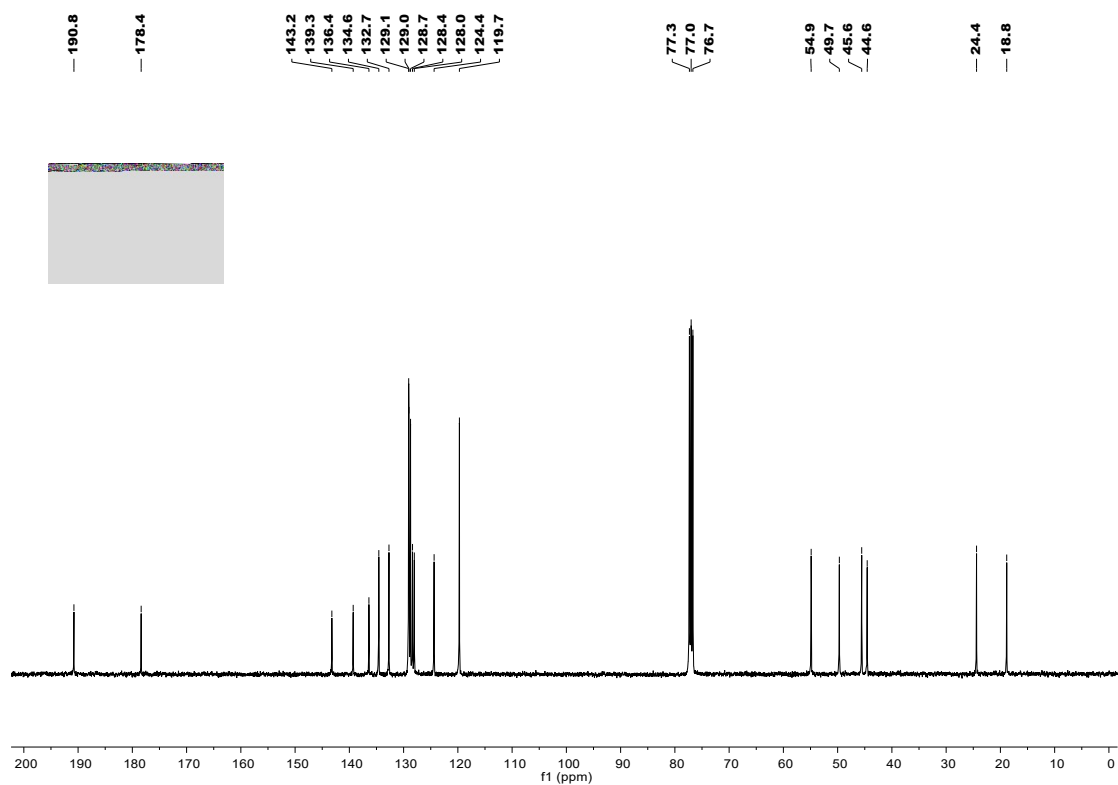

$^1\text{H}$  NMR spectrum of compound (**3oa**)

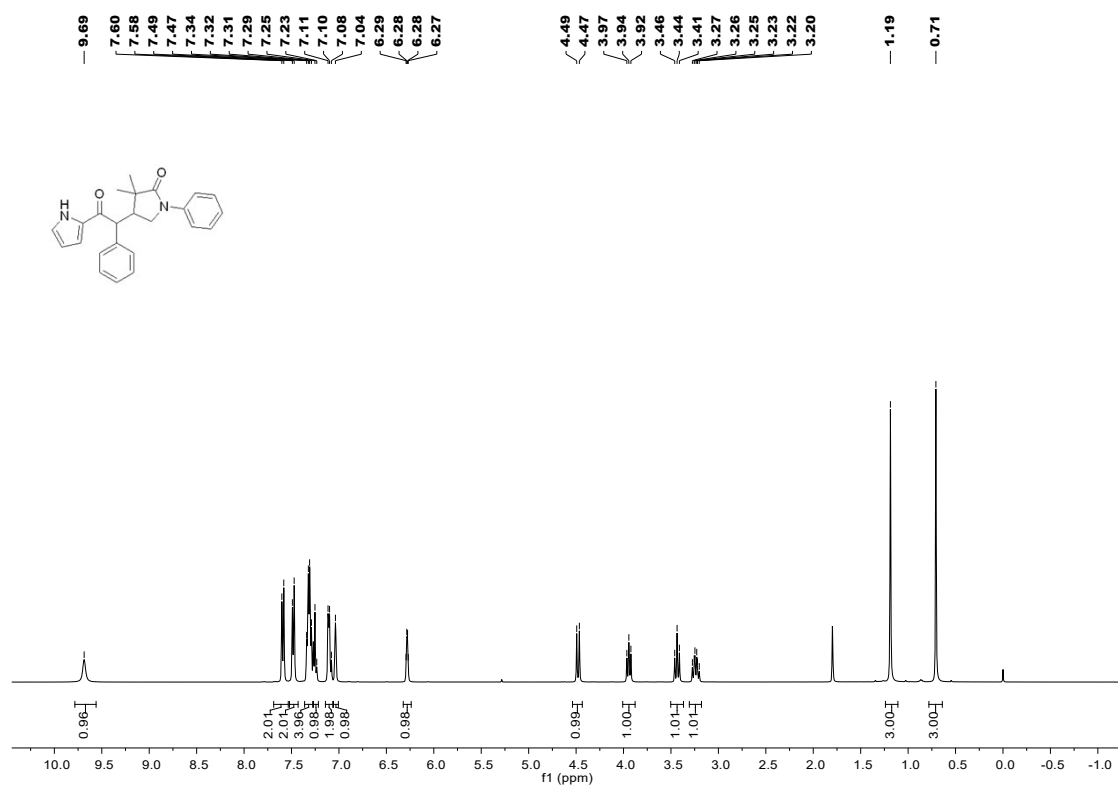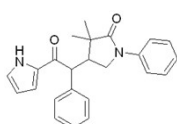

<sup>13</sup>C NMR spectrum of compound (30a)

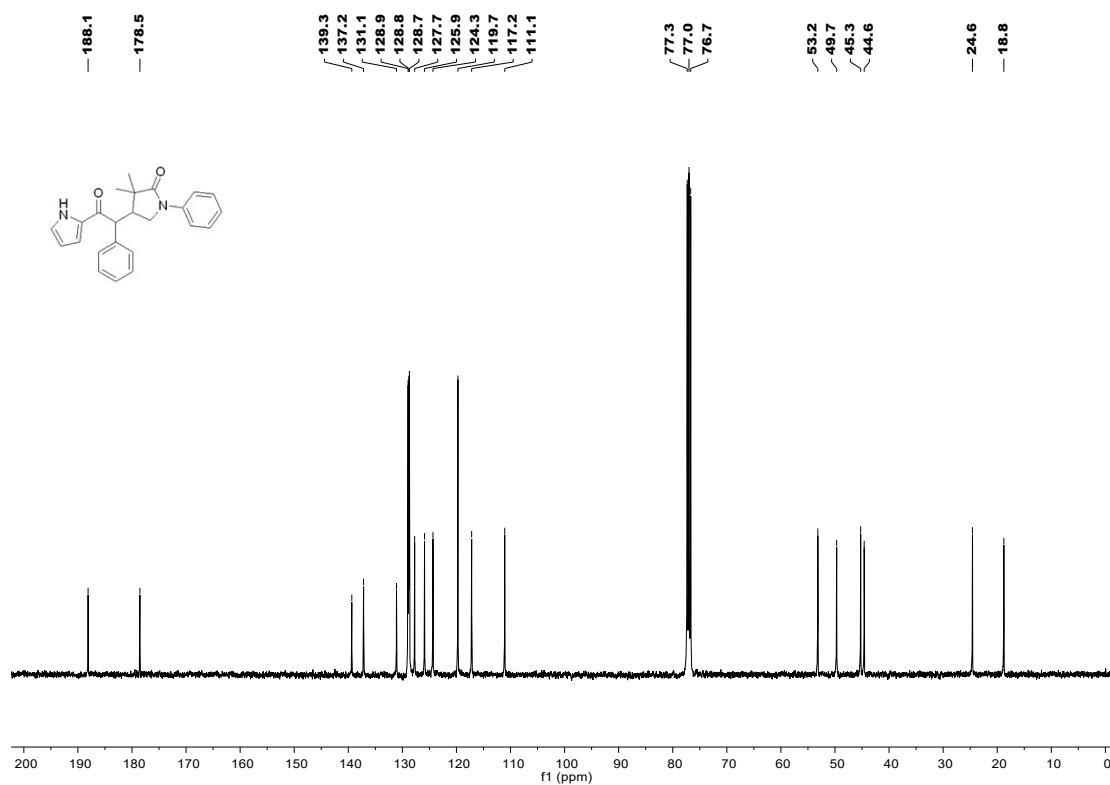

<sup>1</sup>H NMR spectrum of compound (3pa)

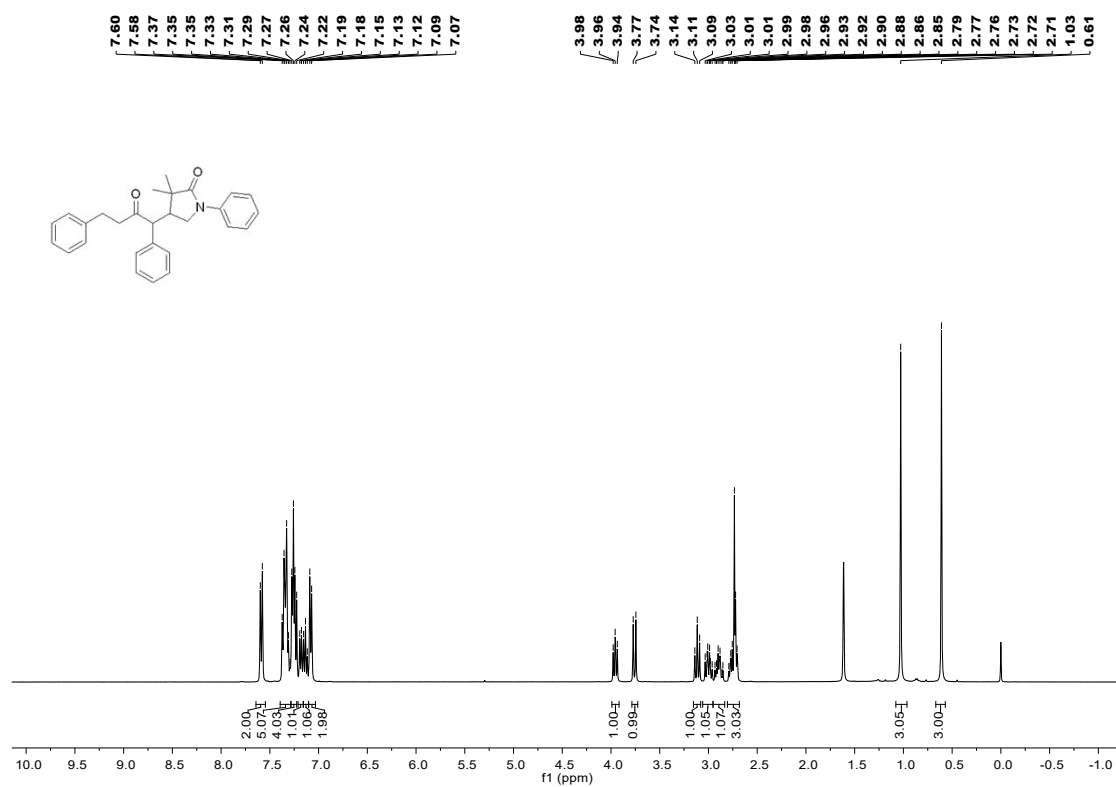

<sup>13</sup>C NMR spectrum of compound (3pa)

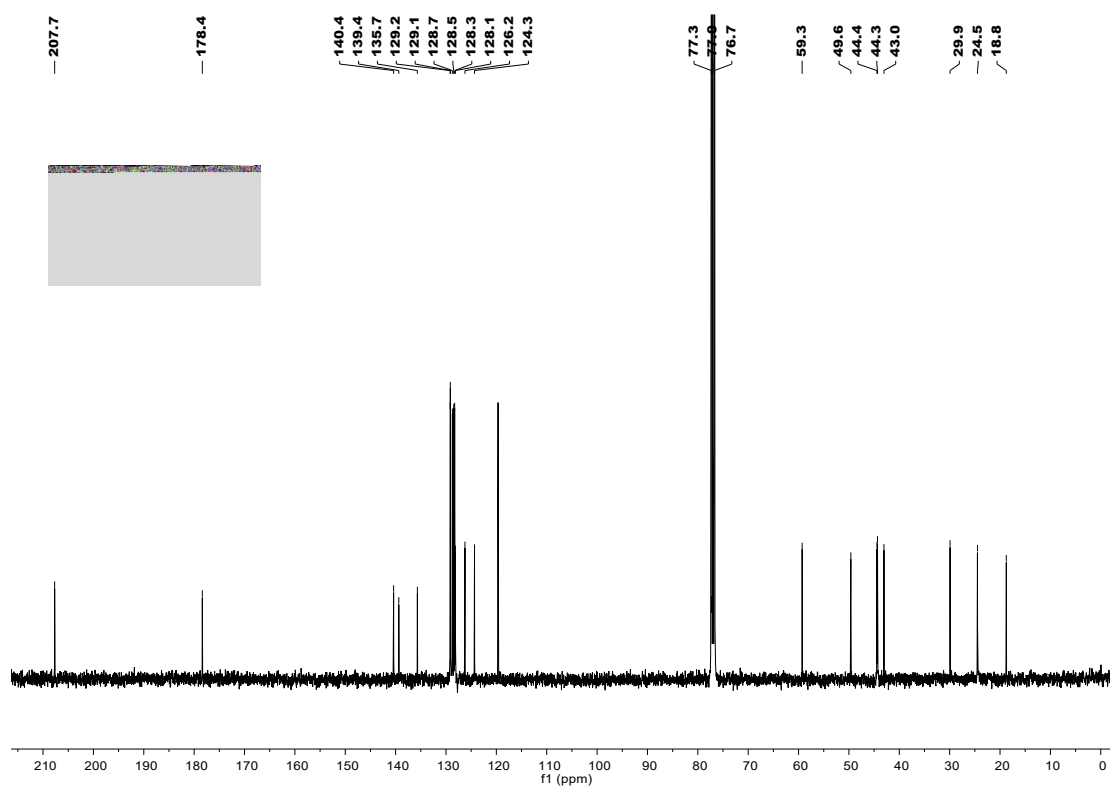

<sup>1</sup>H NMR spectrum of compound (3qa)

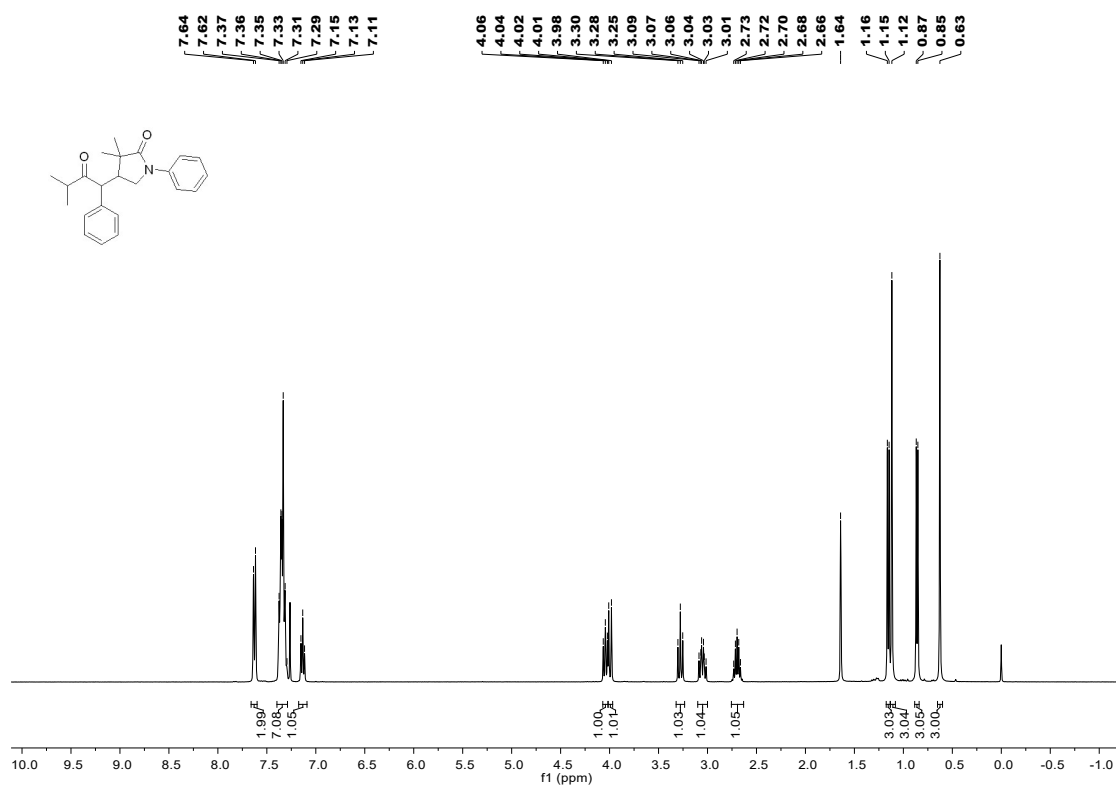

<sup>13</sup>C NMR spectrum of compound (3qa)

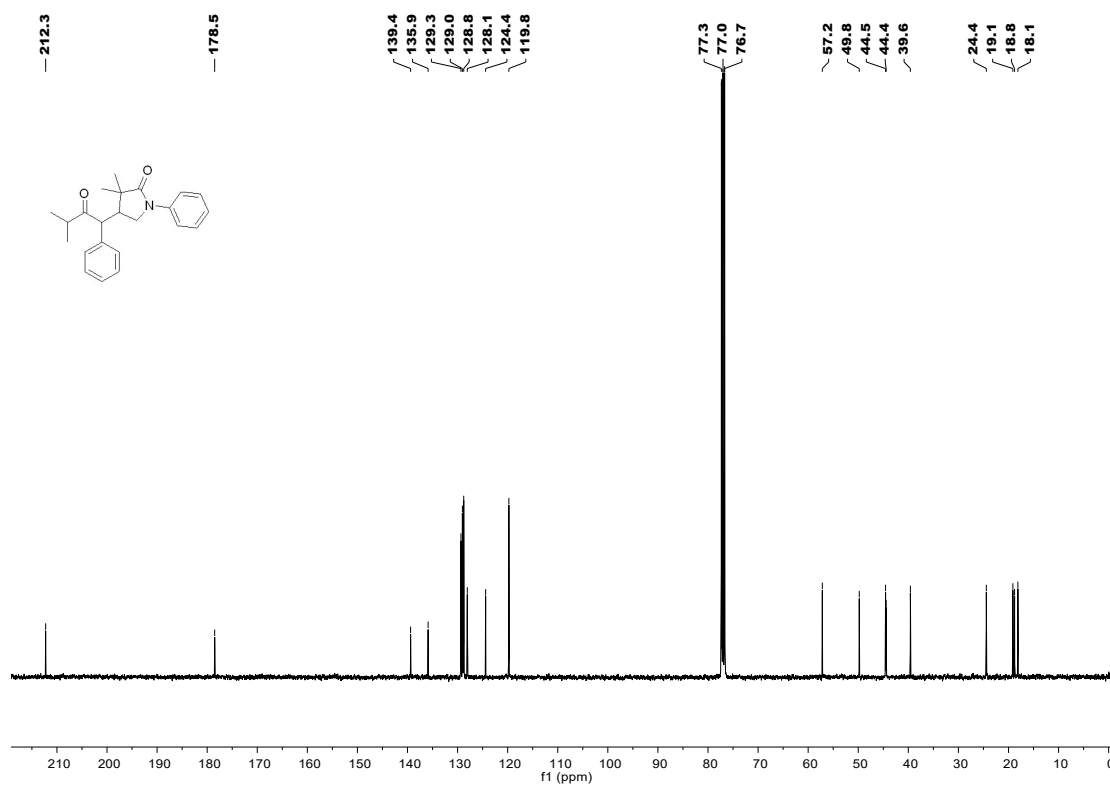

<sup>1</sup>H NMR spectrum of compound (3ra)

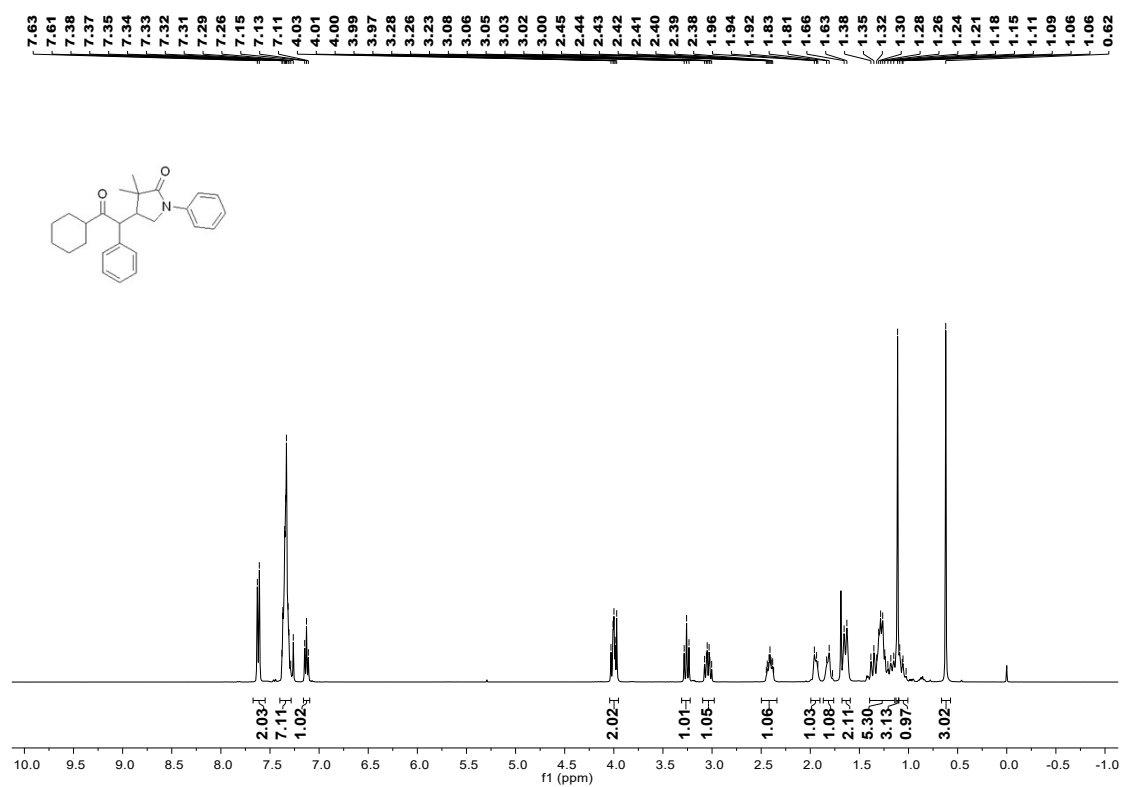

<sup>13</sup>C NMR spectrum of compound (3ra)

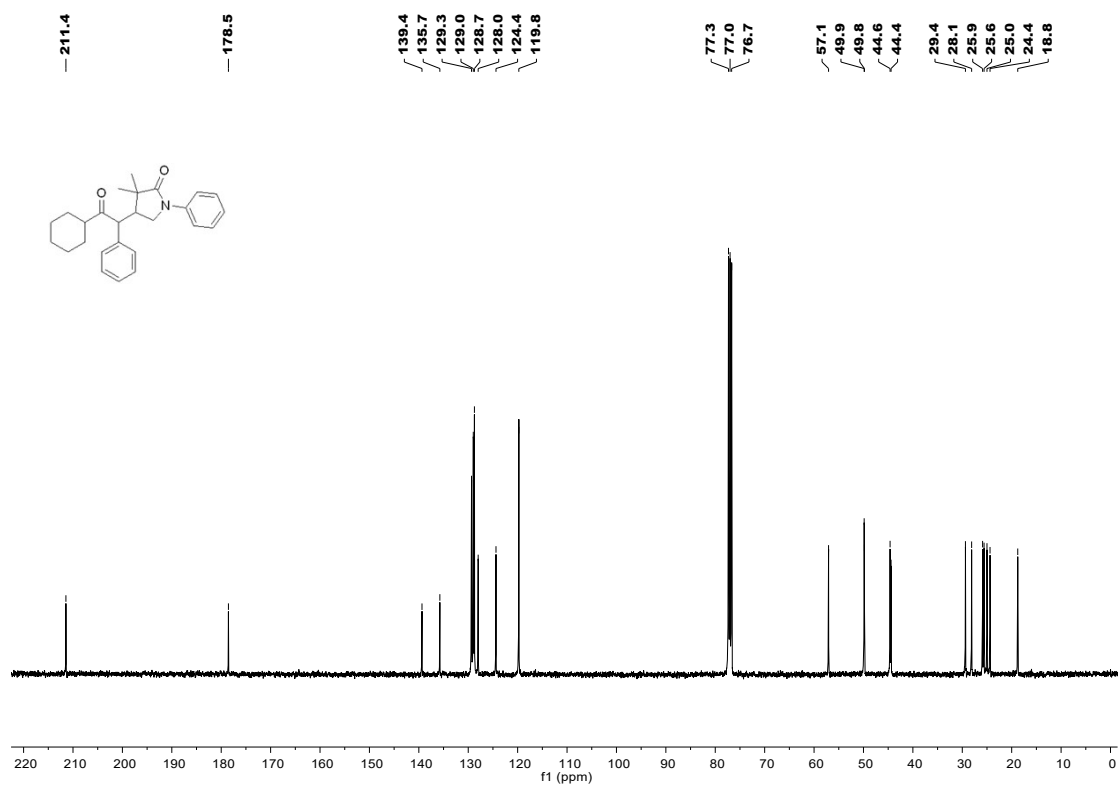

<sup>1</sup>H NMR spectrum of compound (3fb)

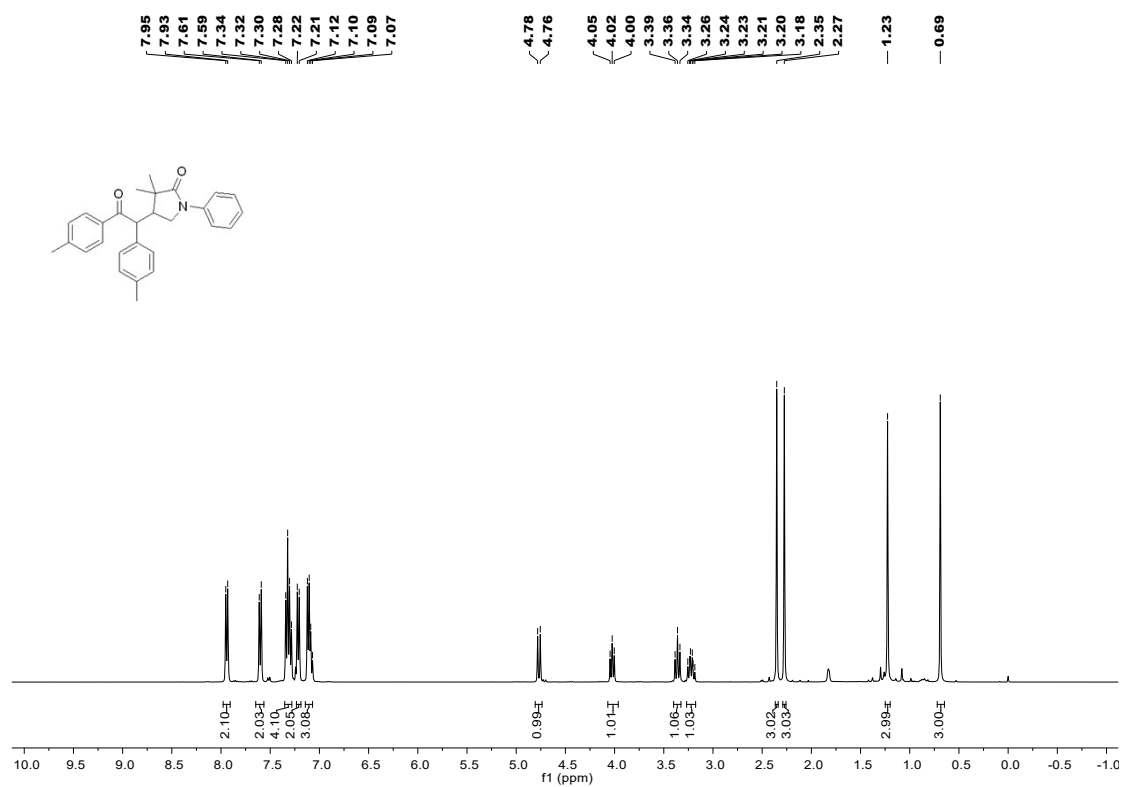





<sup>13</sup>C NMR spectrum of compound (3fc)

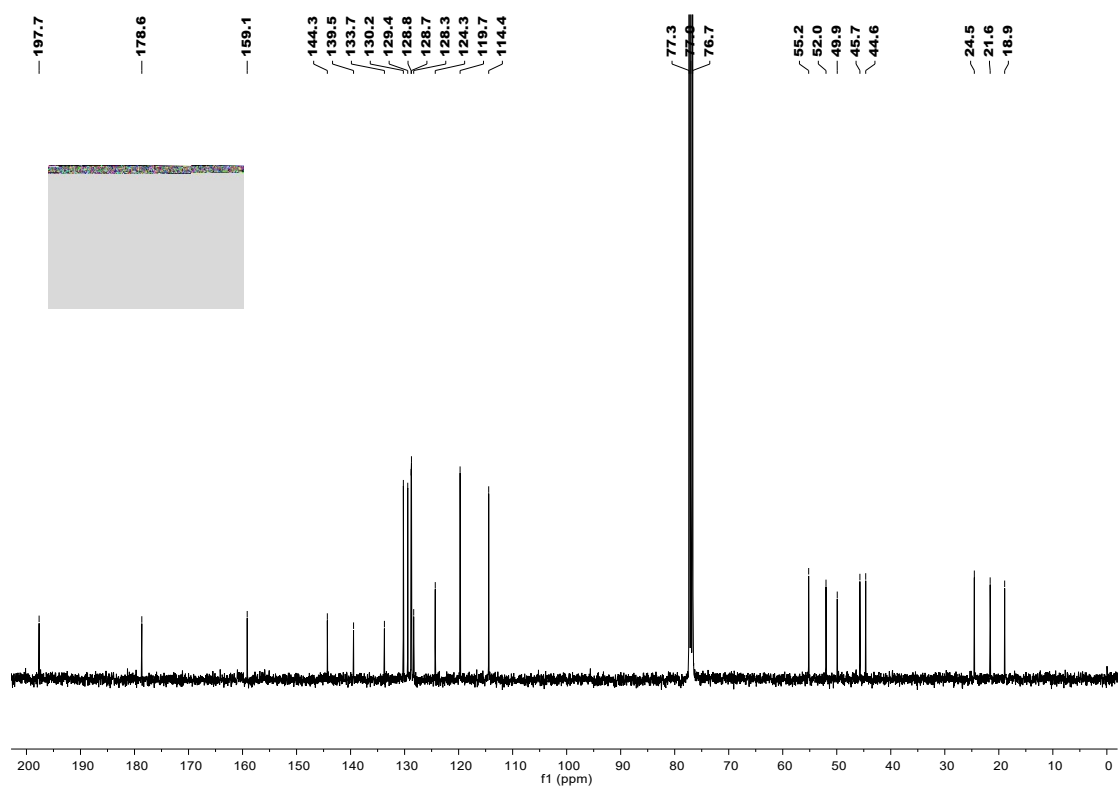

<sup>1</sup>H NMR spectrum of compound (3fd)

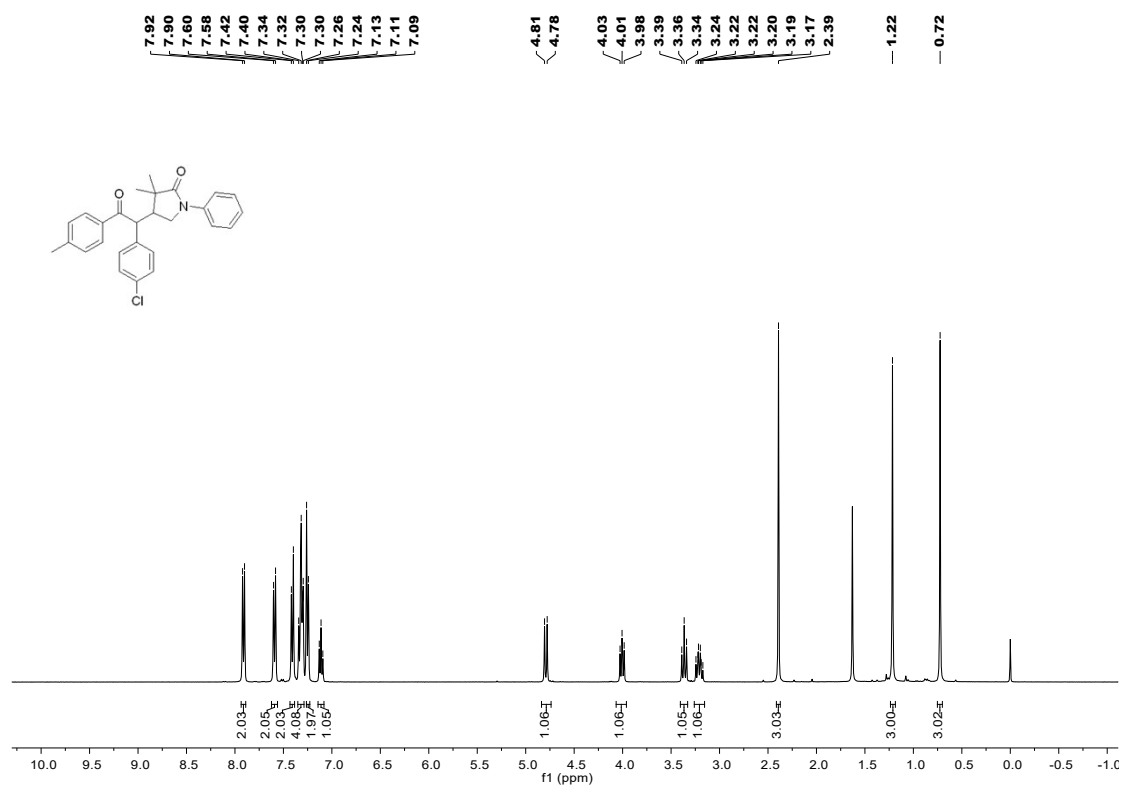

<sup>13</sup>C NMR spectrum of compound (3fd)

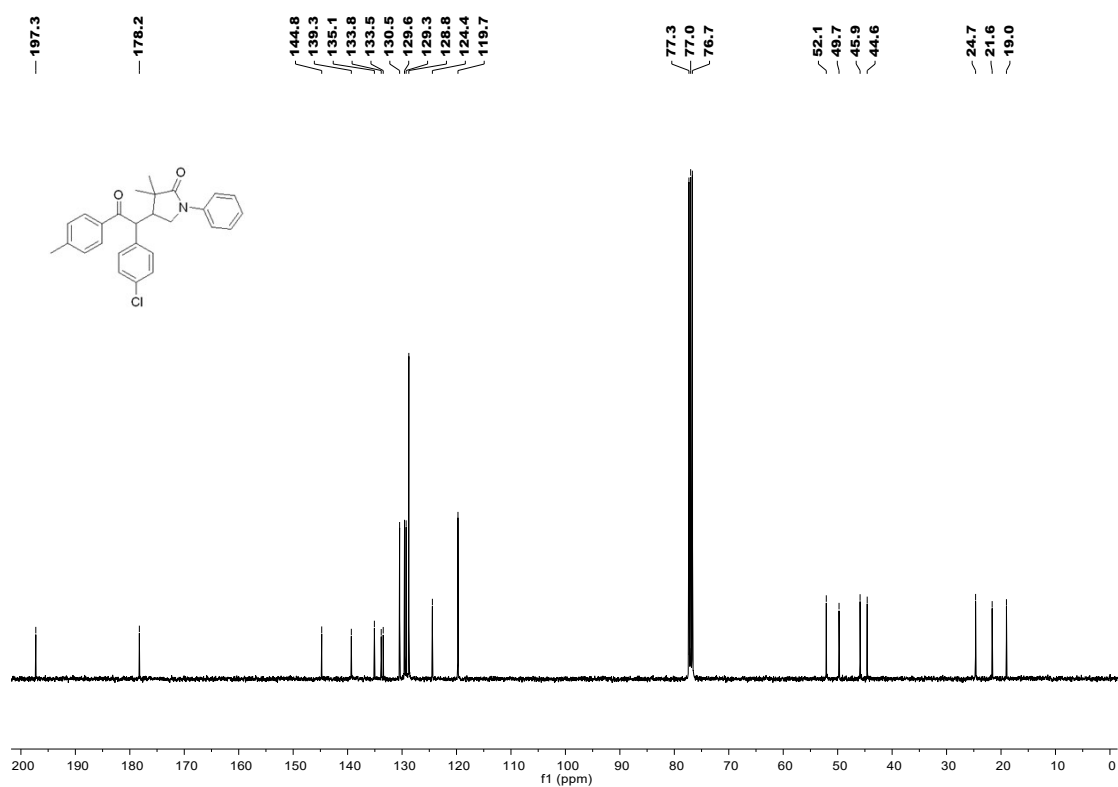

<sup>1</sup>H NMR spectrum of compound (3fe)

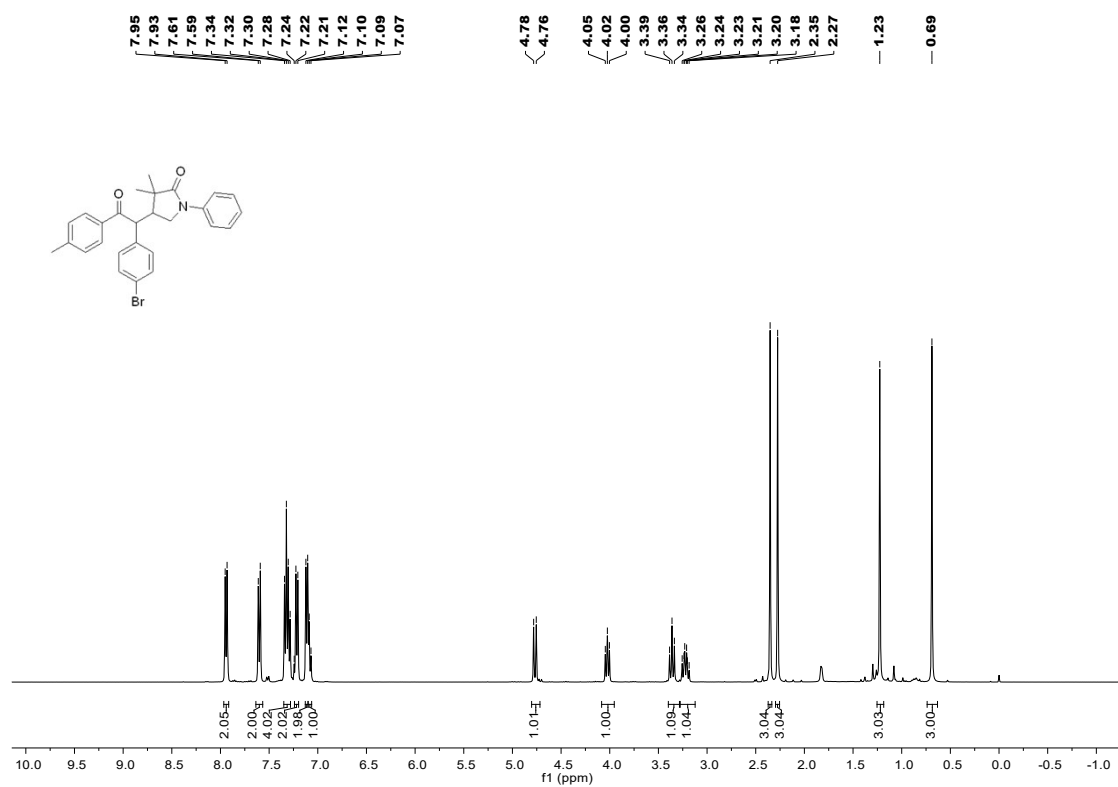

<sup>13</sup>C NMR spectrum of compound (3fe)

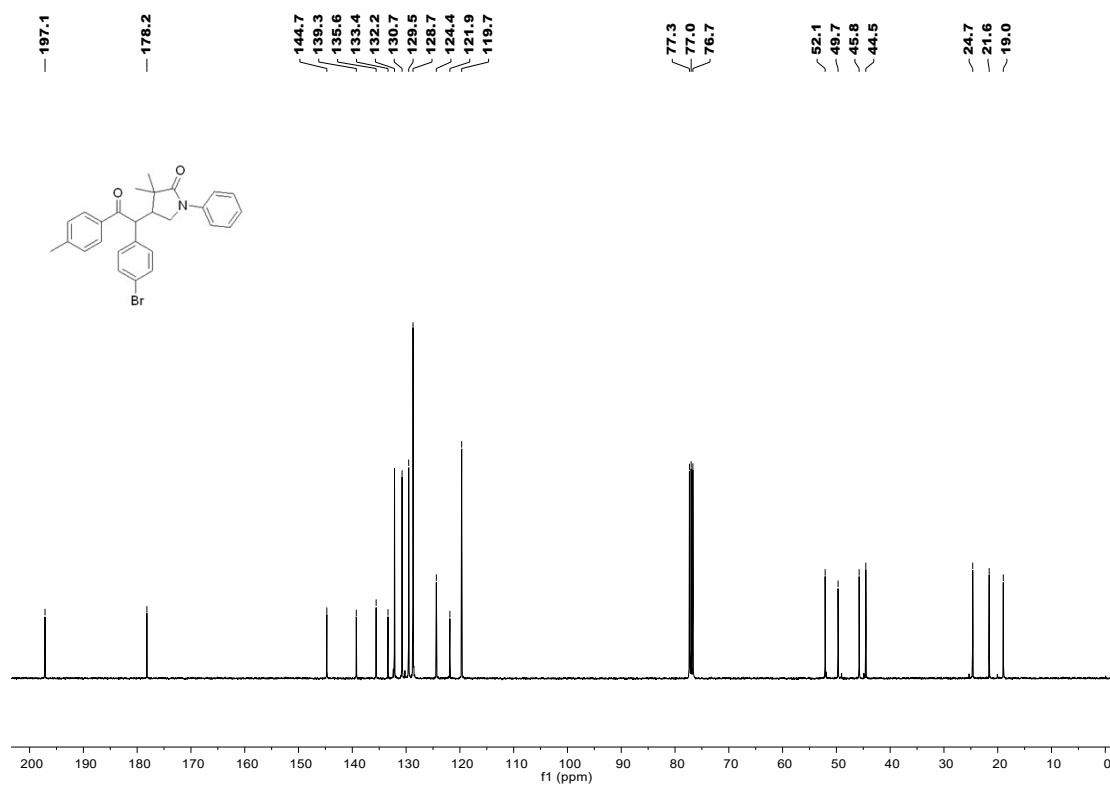

<sup>1</sup>H NMR spectrum of compound (3ff)

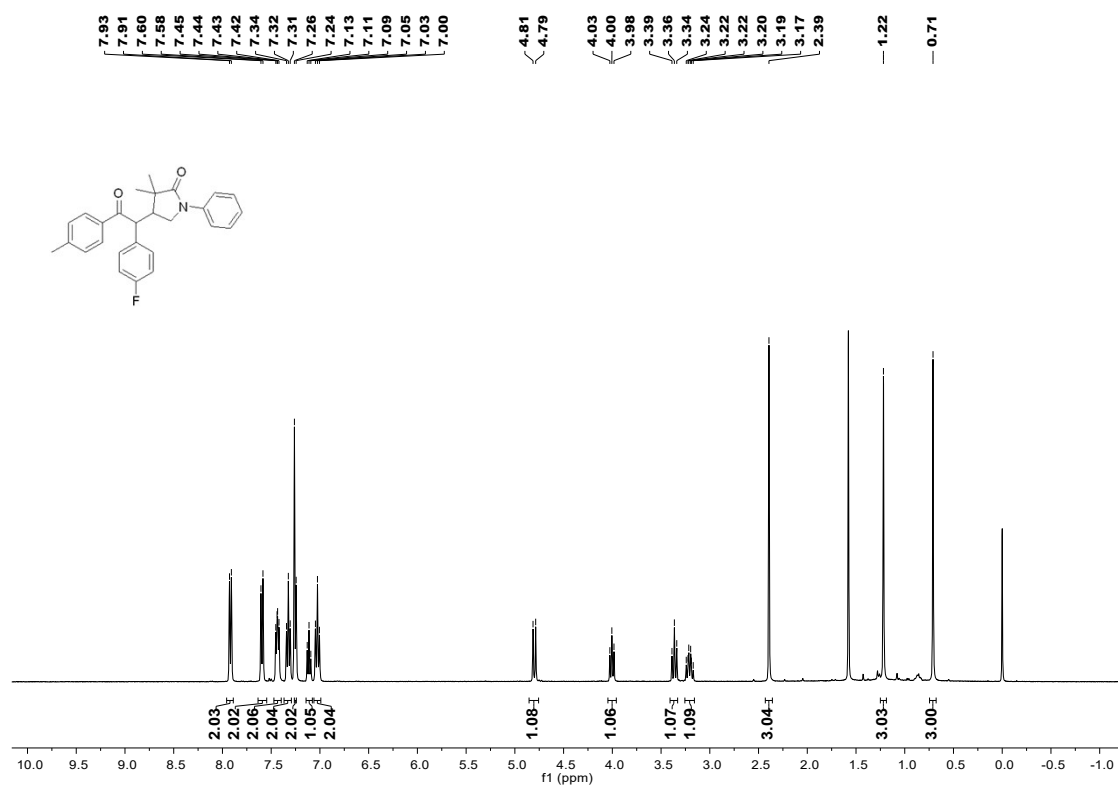

<sup>13</sup>C NMR spectrum of compound (3ff)

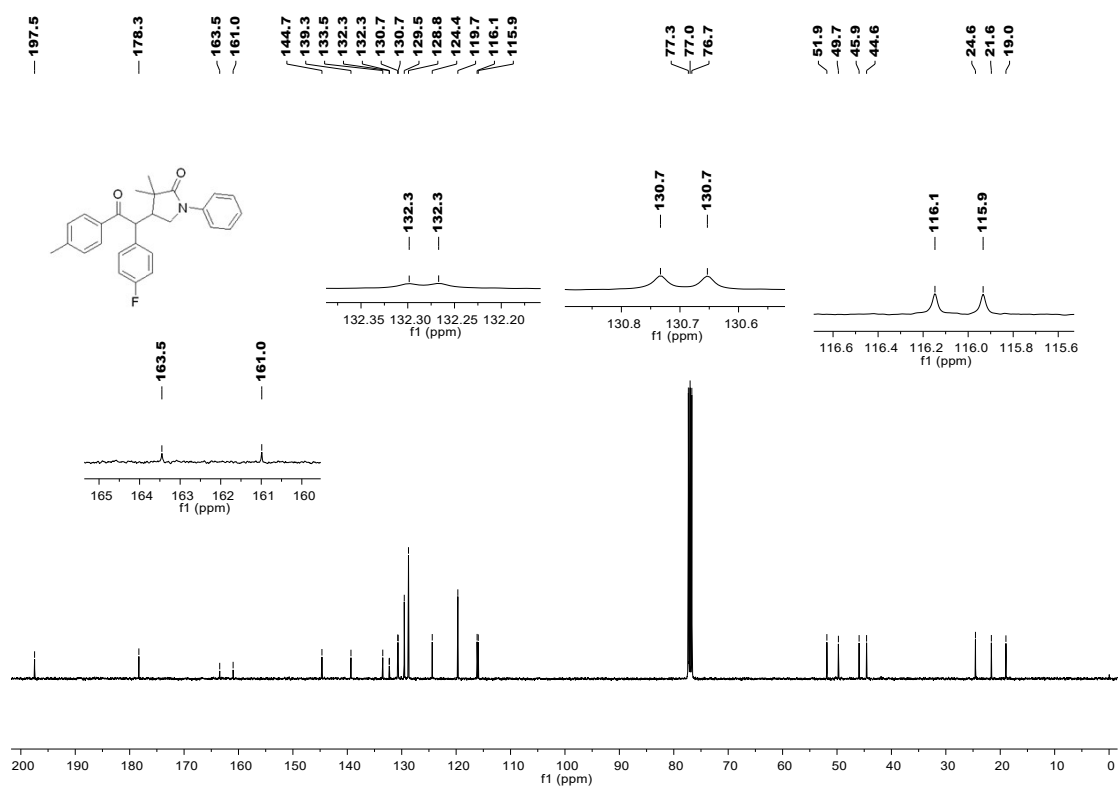

<sup>19</sup>F NMR spectrum of compound (3ff)

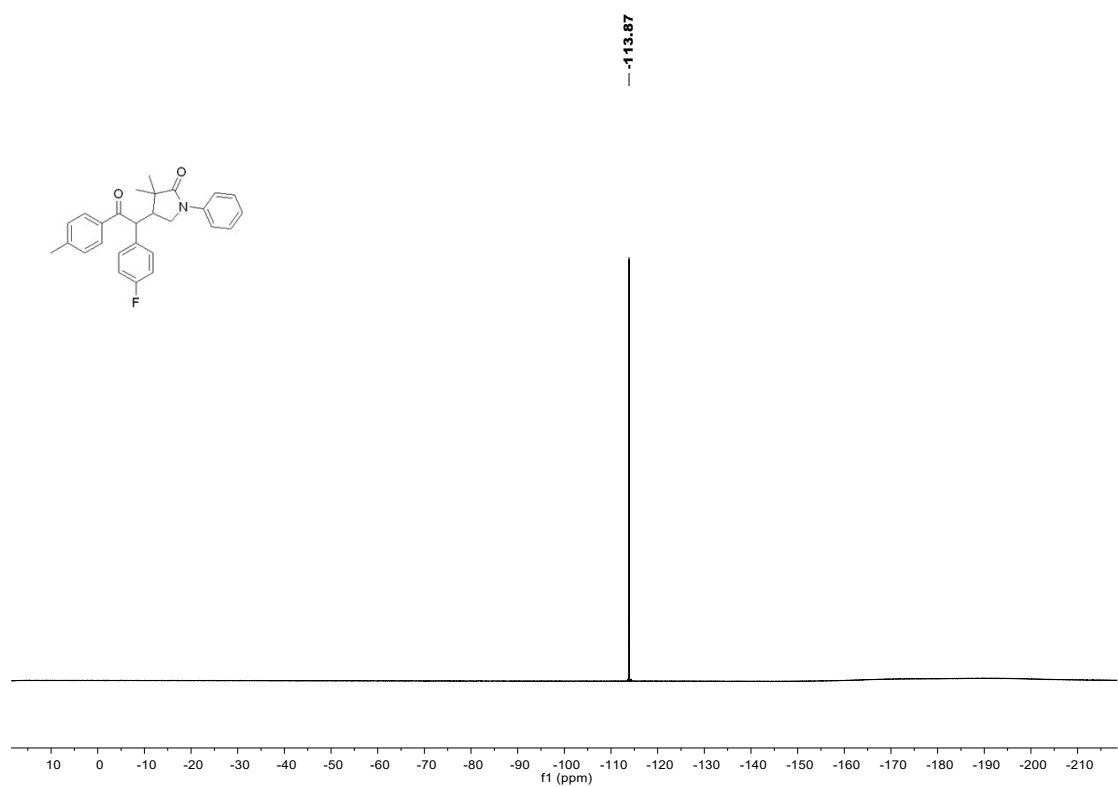



<sup>1</sup>H NMR spectrum of compound (3fh)

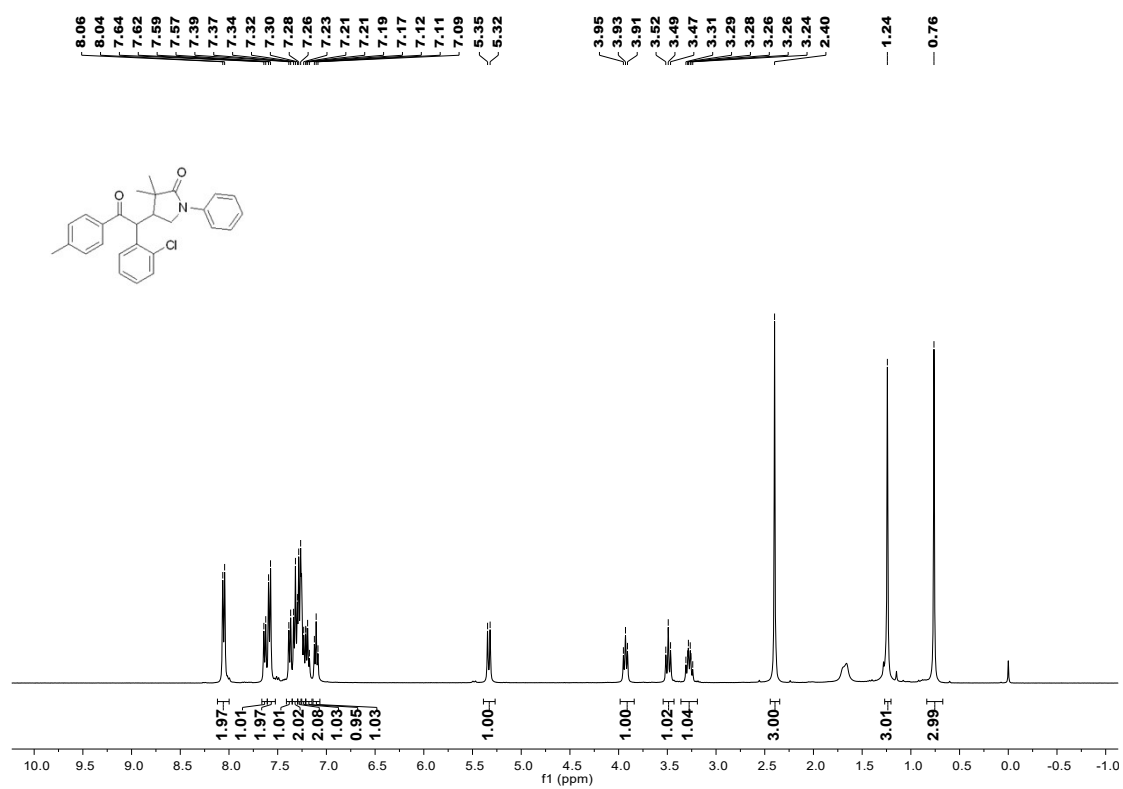

<sup>13</sup>C NMR spectrum of compound (3fh)

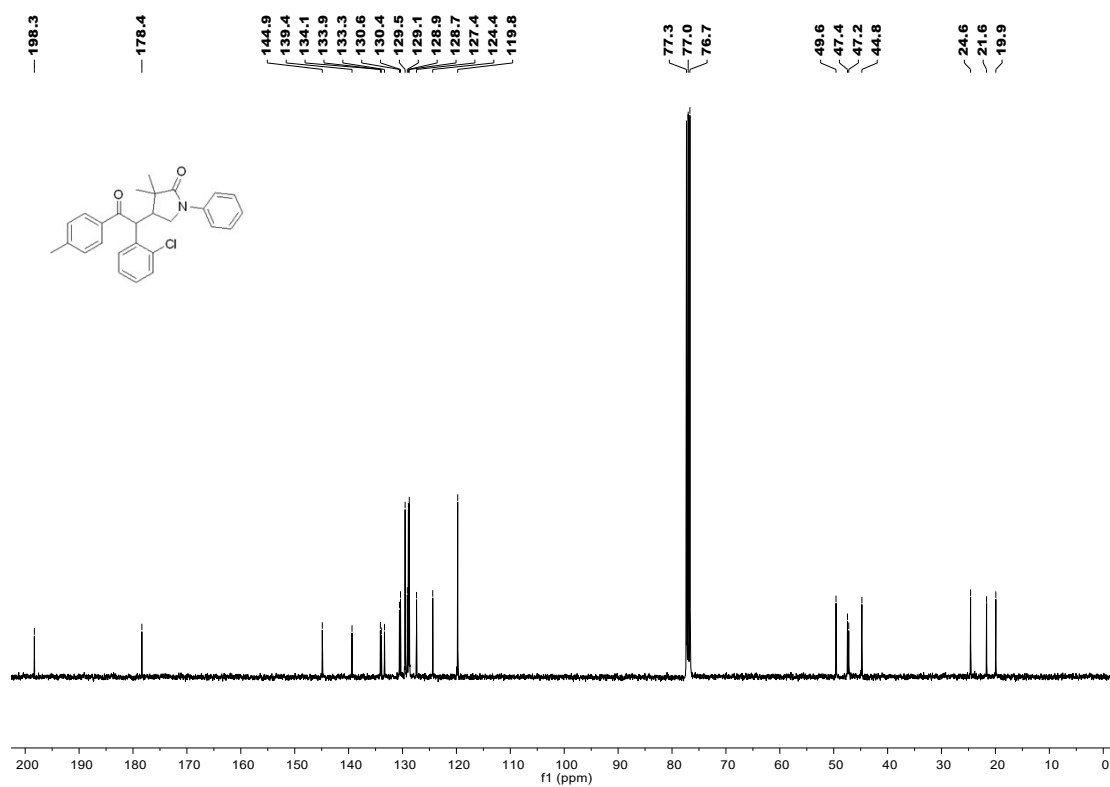

<sup>1</sup>H NMR spectrum of compound (3fi)

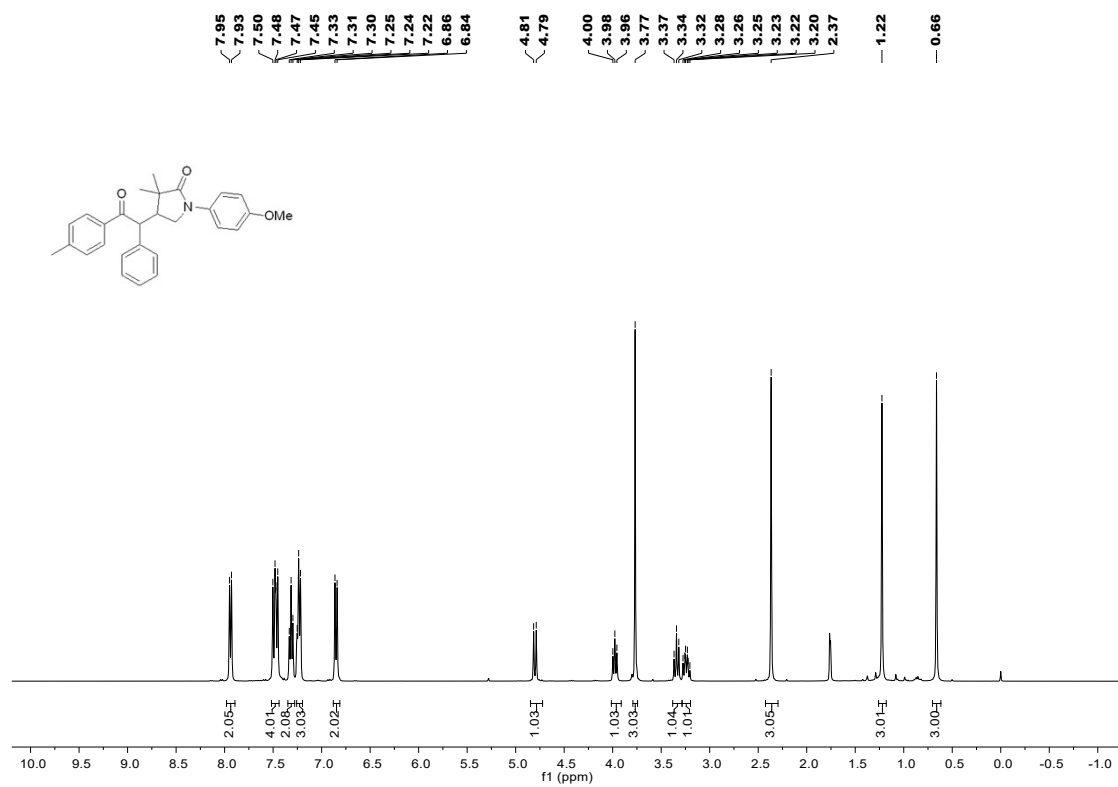

<sup>13</sup>C NMR spectrum of compound (3fi)

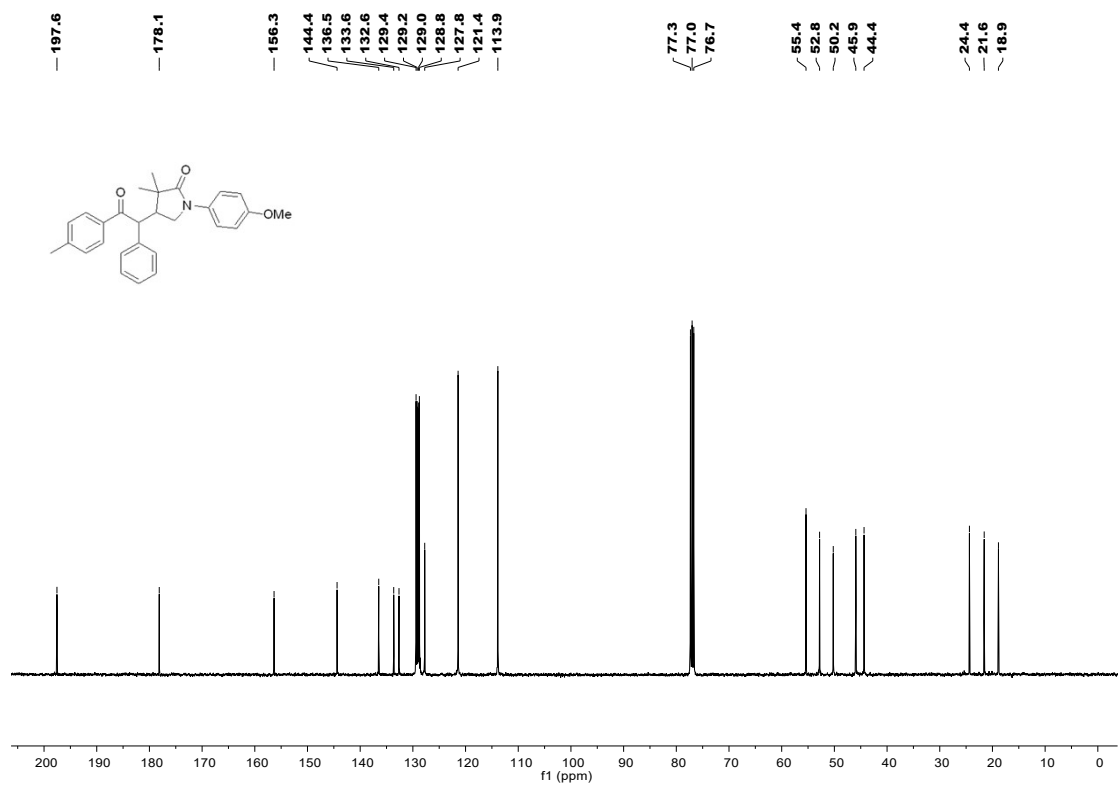



<sup>1</sup>H NMR spectrum of compound (3fj)

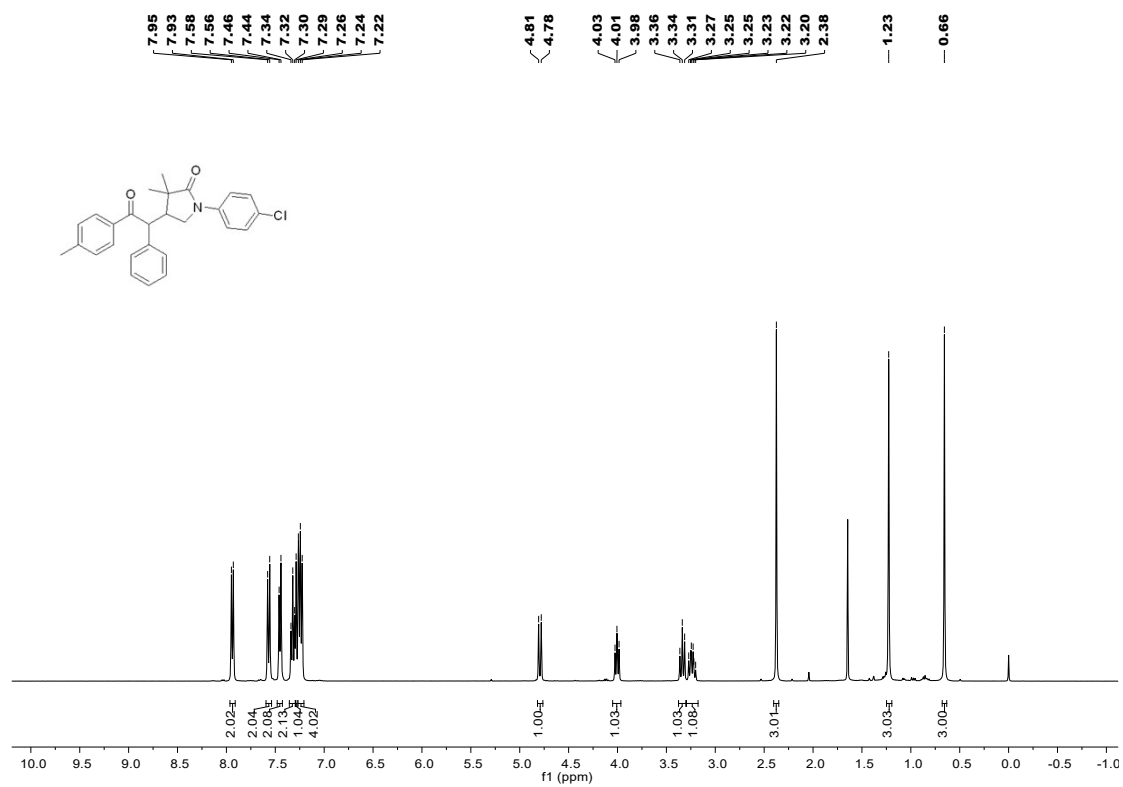

<sup>13</sup>C NMR spectrum of compound (3fj)

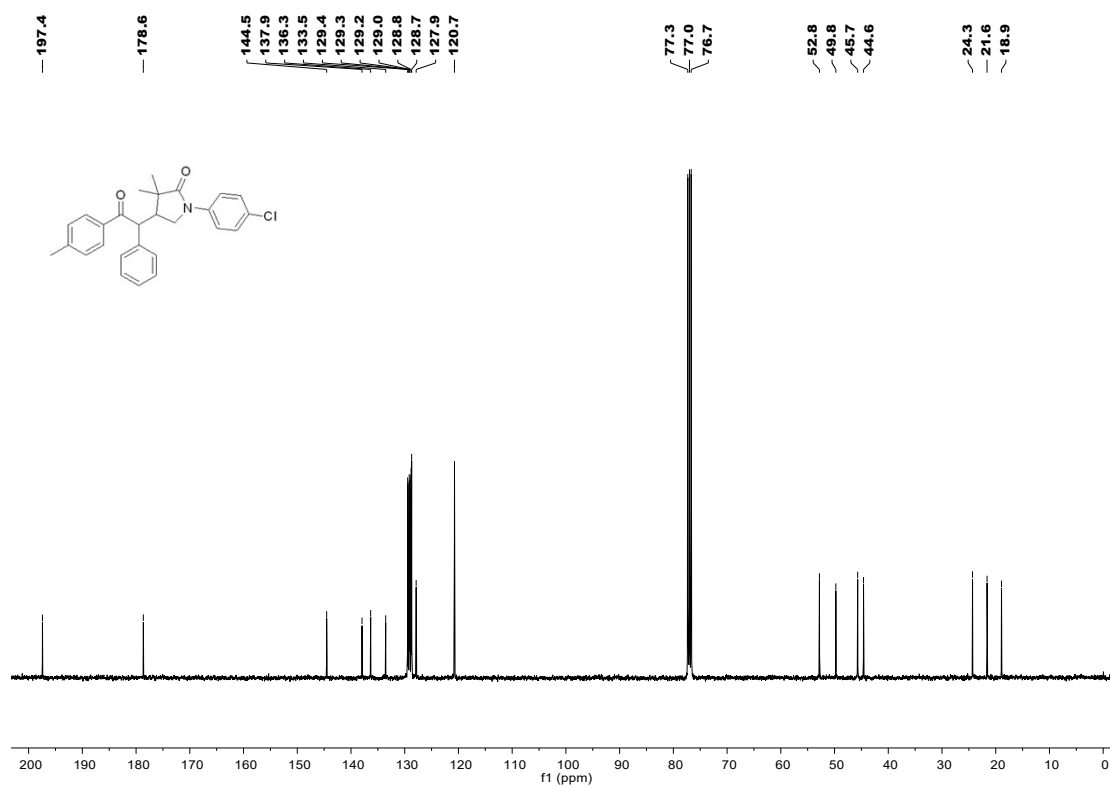

<sup>1</sup>H NMR spectrum of compound (3fk)

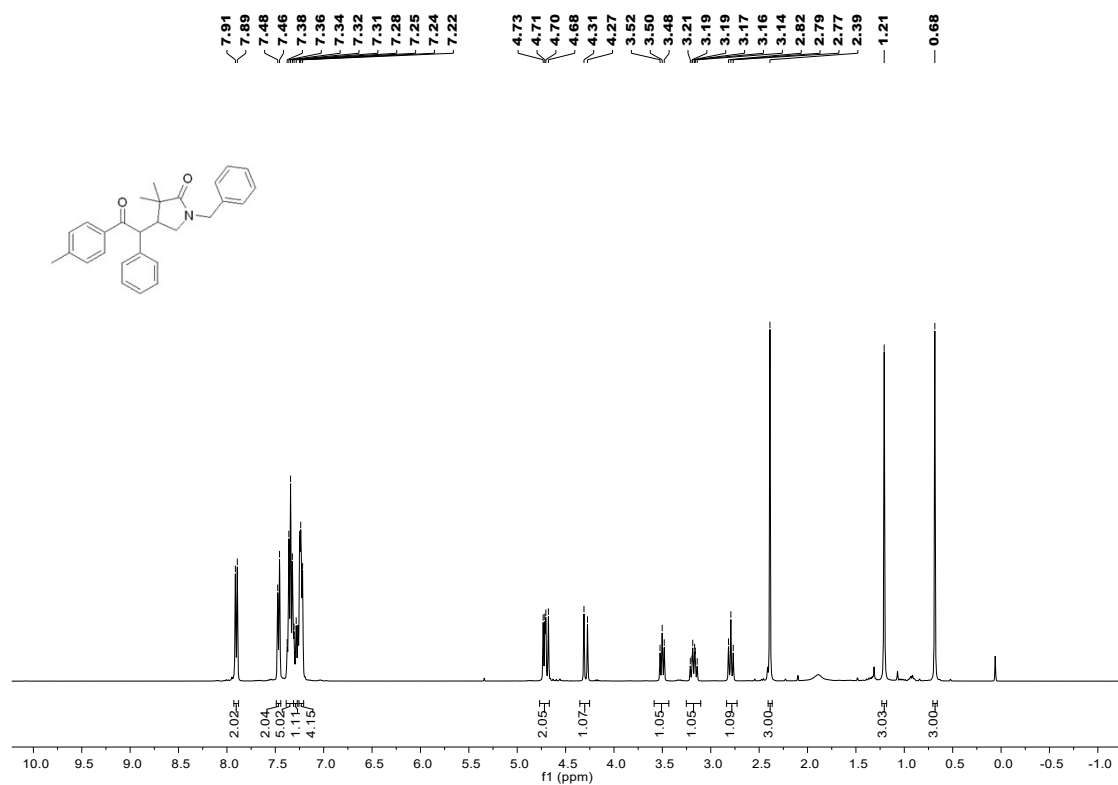

<sup>13</sup>C NMR spectrum of compound (3fk)

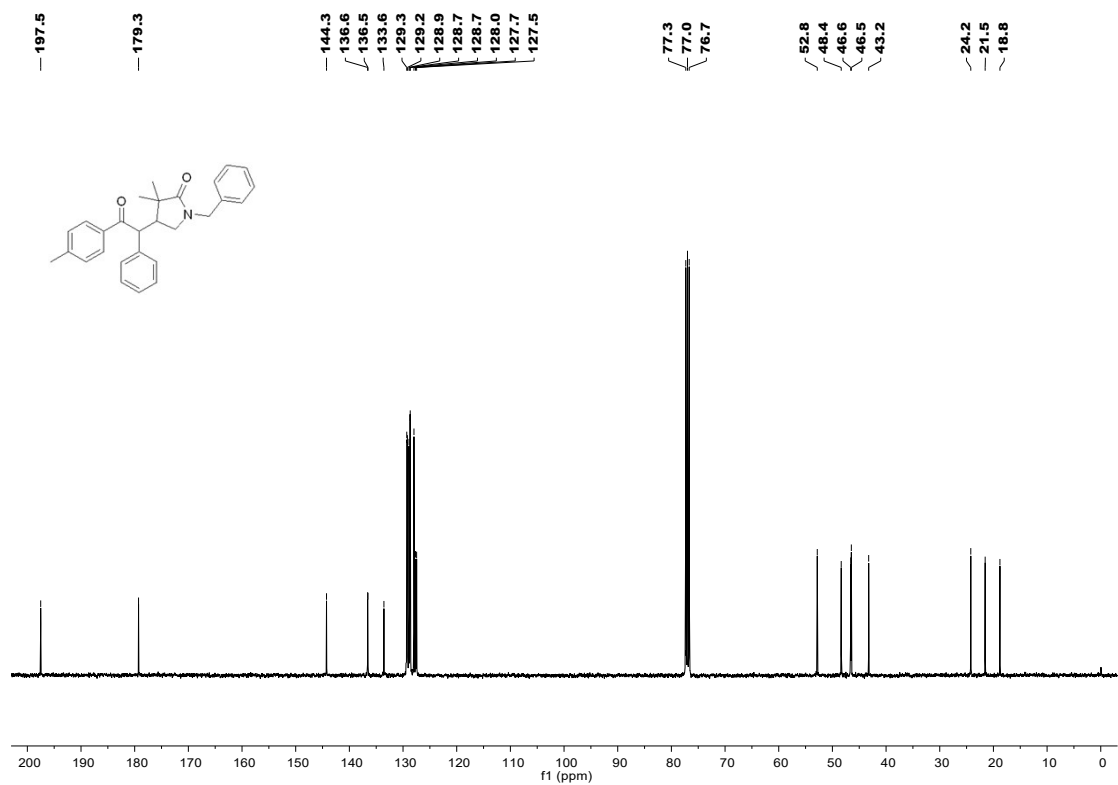

<sup>1</sup>H NMR spectrum of compound (3fl)

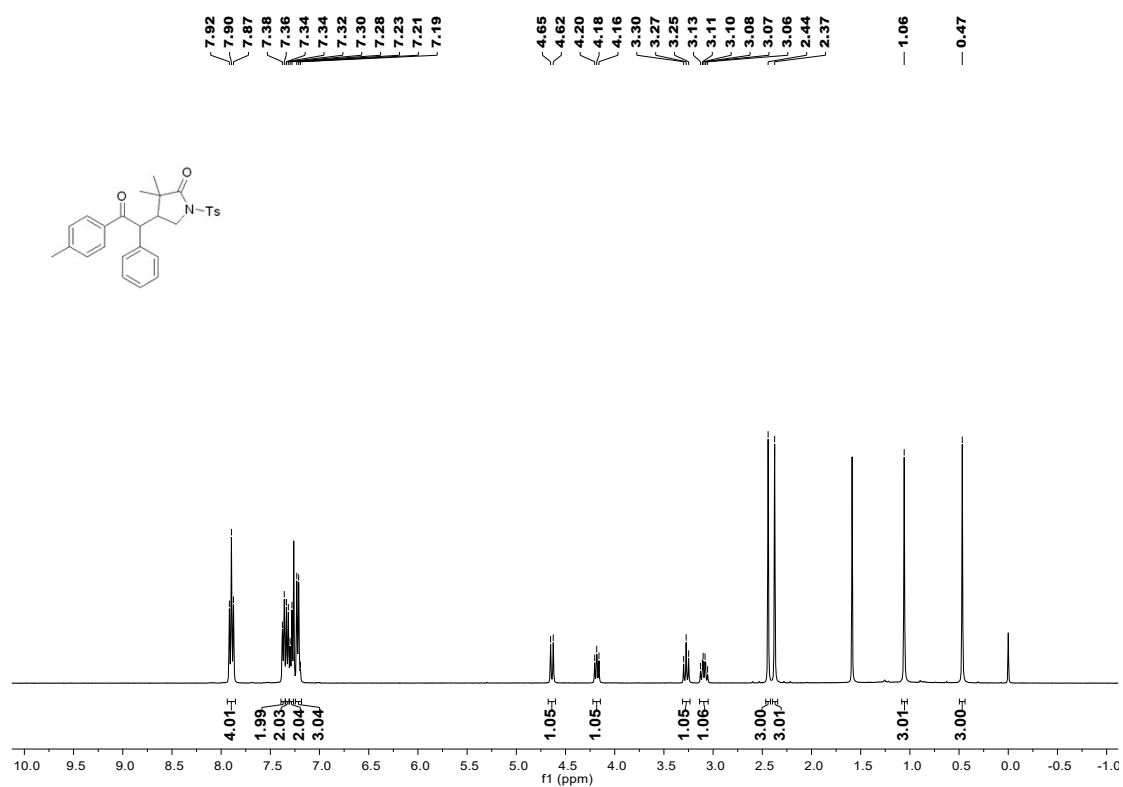

<sup>13</sup>C NMR spectrum of compound (3fl)

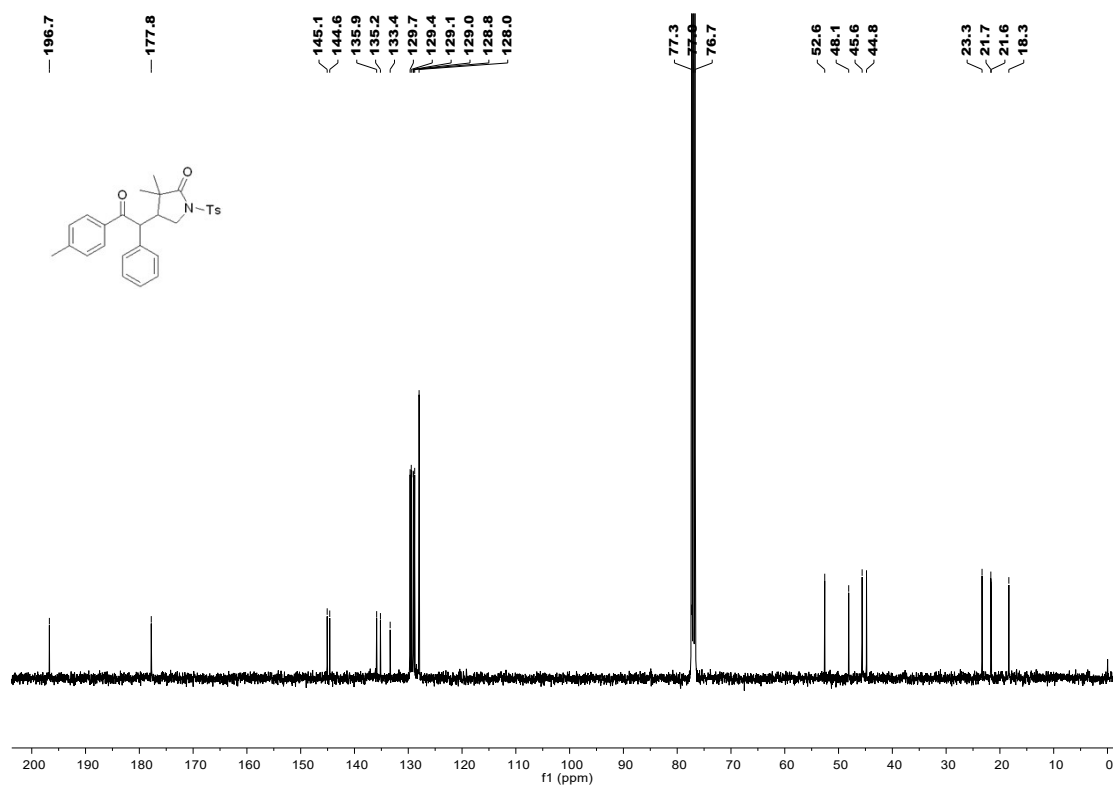

<sup>1</sup>H NMR spectrum of compound (3fm)

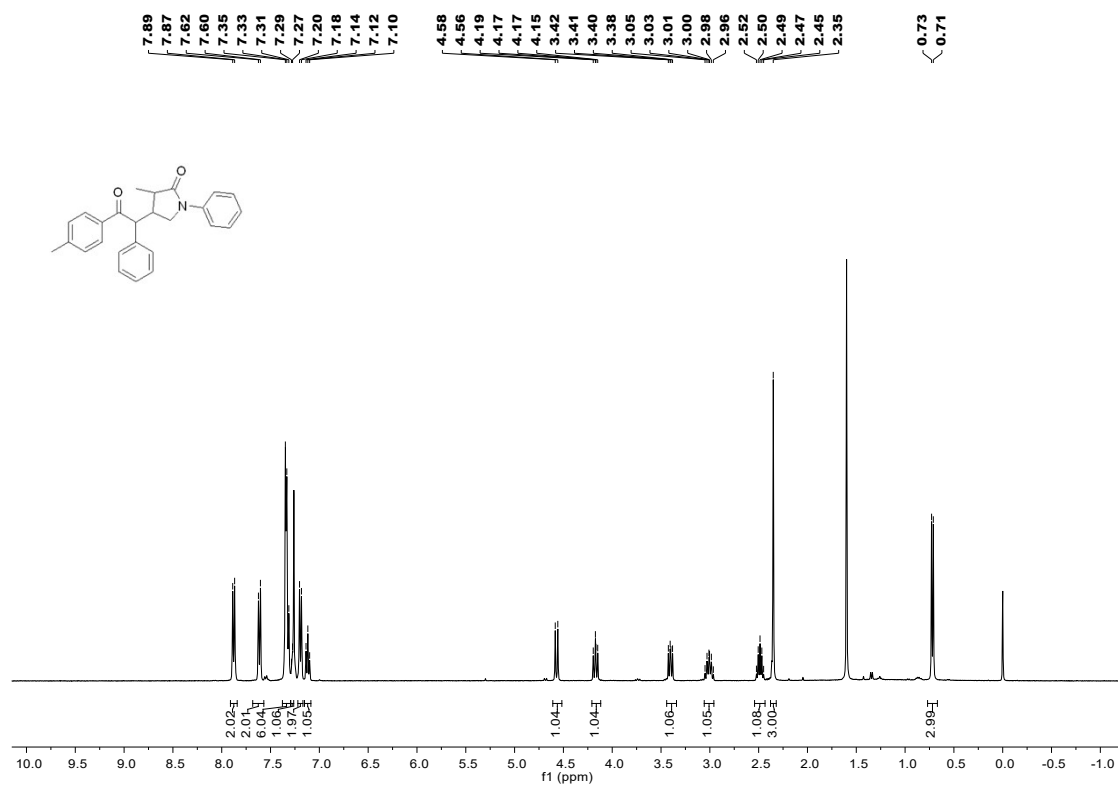

<sup>13</sup>C NMR spectrum of compound (3fm)

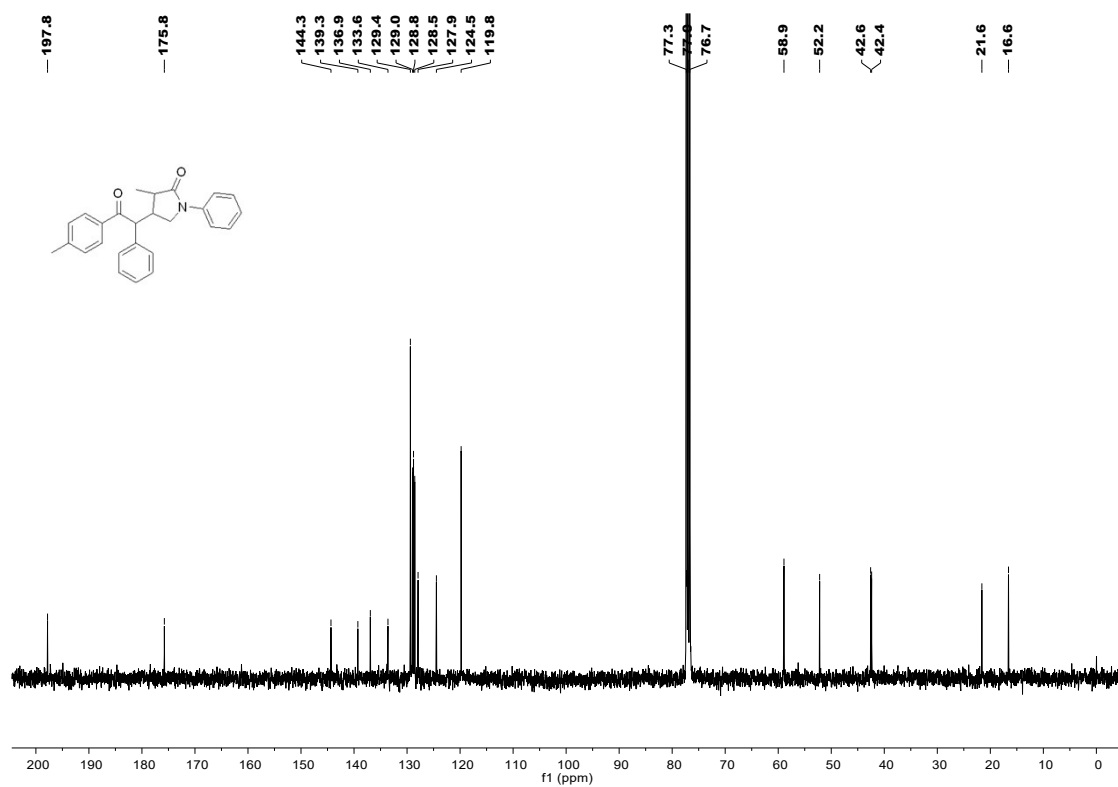

<sup>1</sup>H NMR spectrum of compound (4)

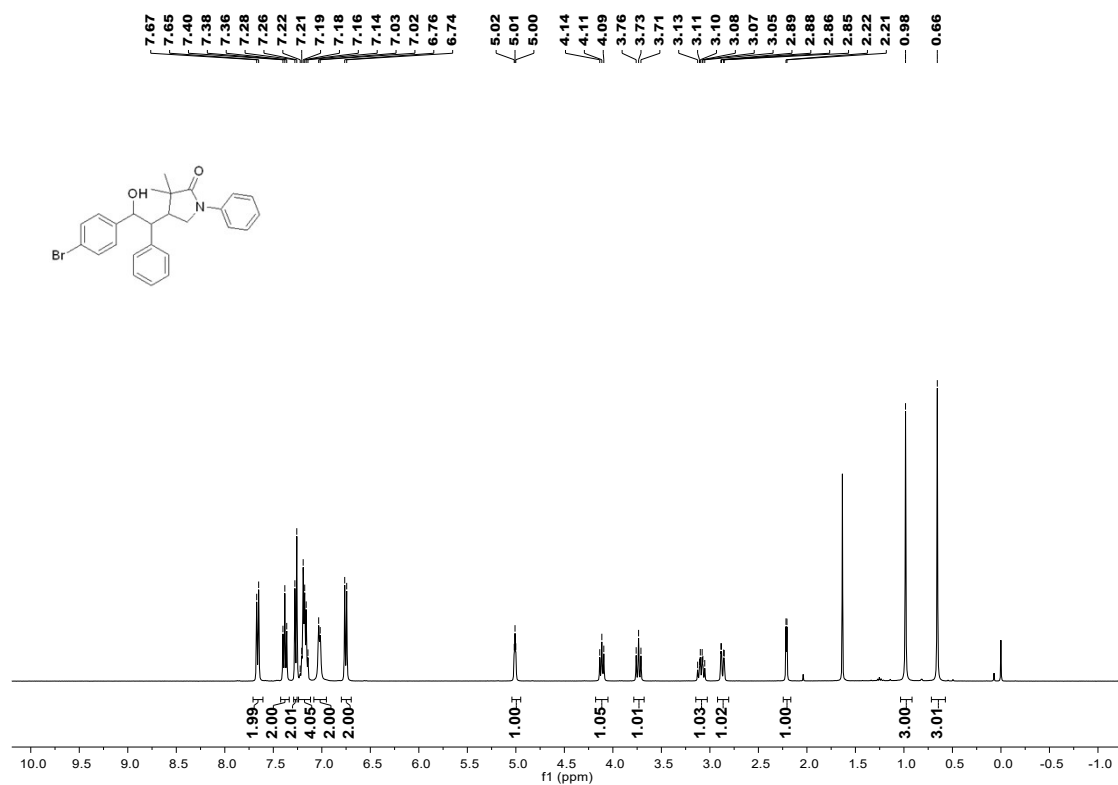

<sup>13</sup>C NMR spectrum of compound (4)

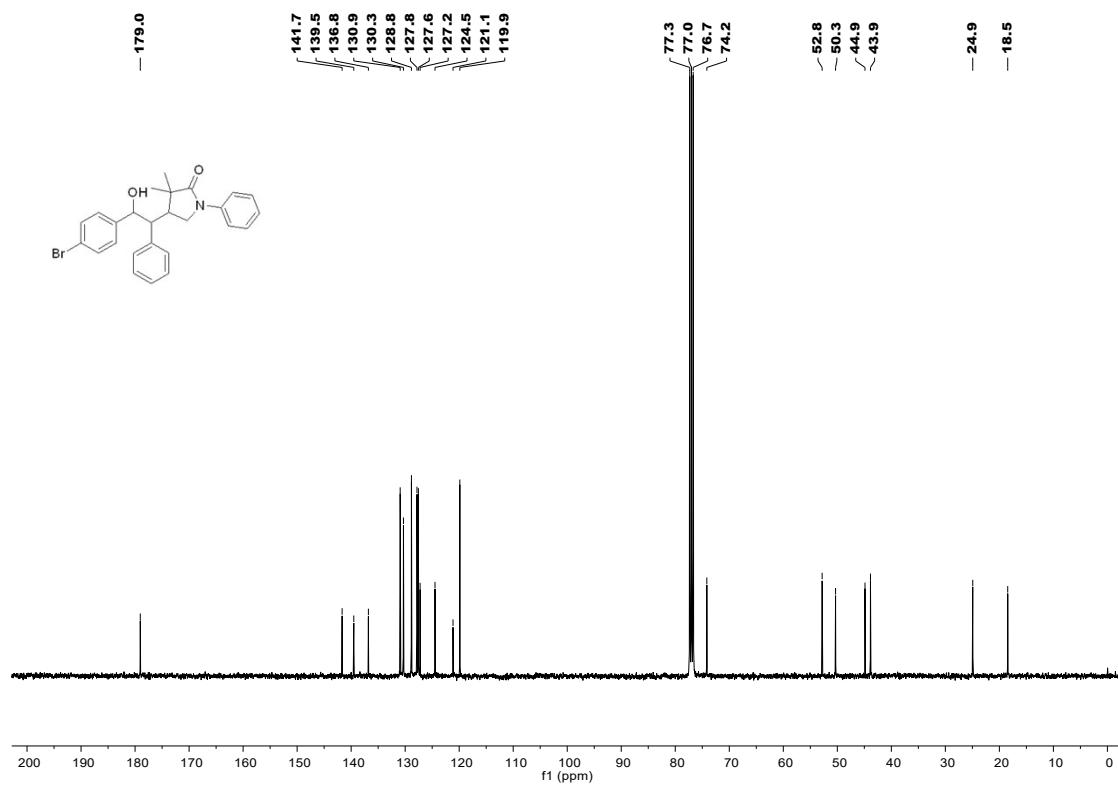

<sup>1</sup>H NMR spectrum of compound (5)

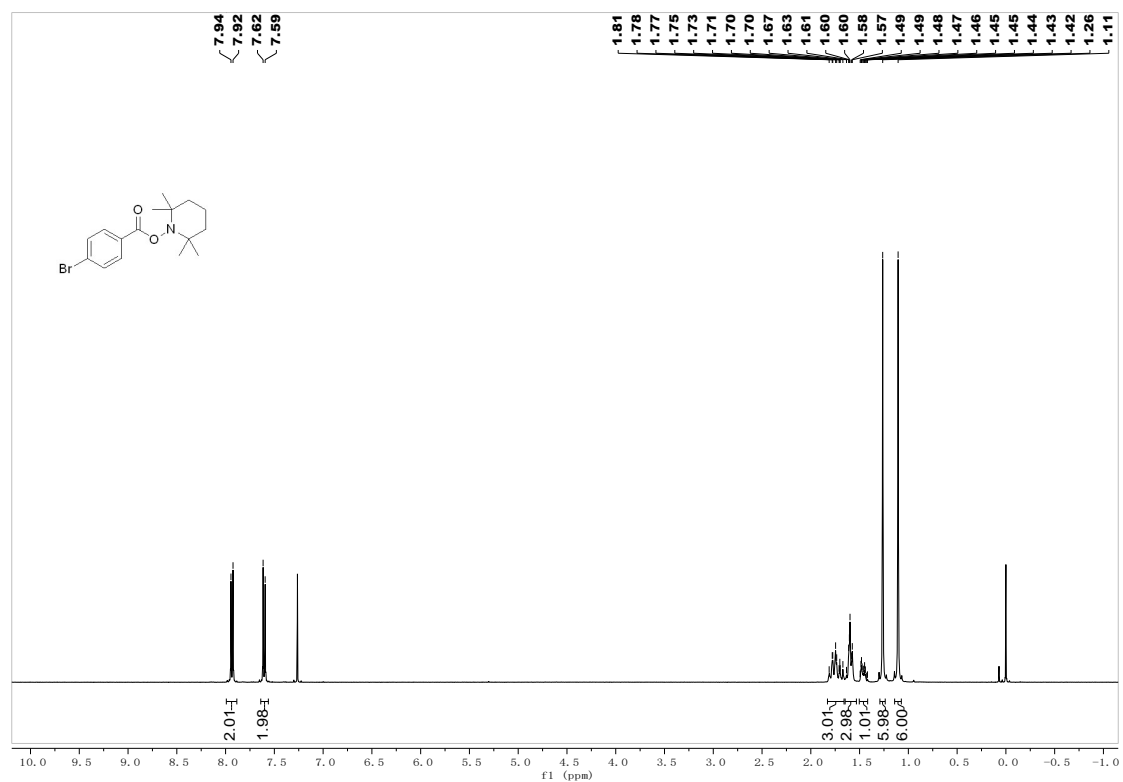

<sup>13</sup>C NMR spectrum of compound (5)

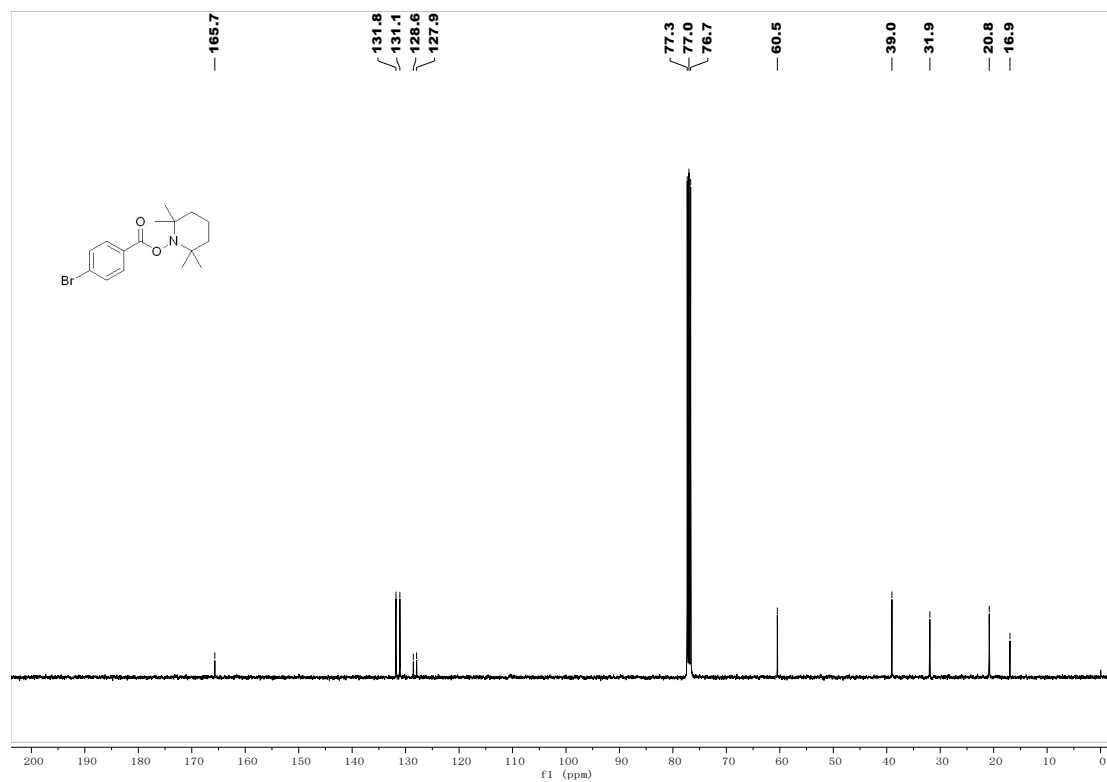

<sup>1</sup>H NMR spectrum of compound (6)

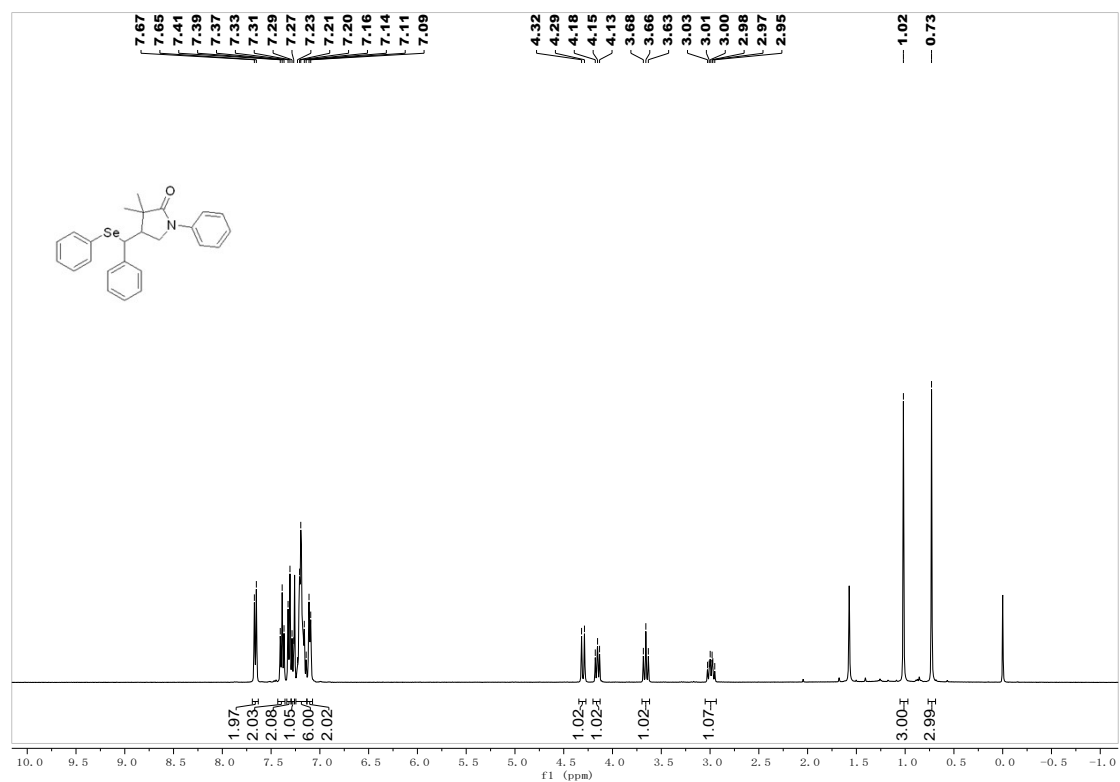

<sup>13</sup>C NMR spectrum of compound (6)

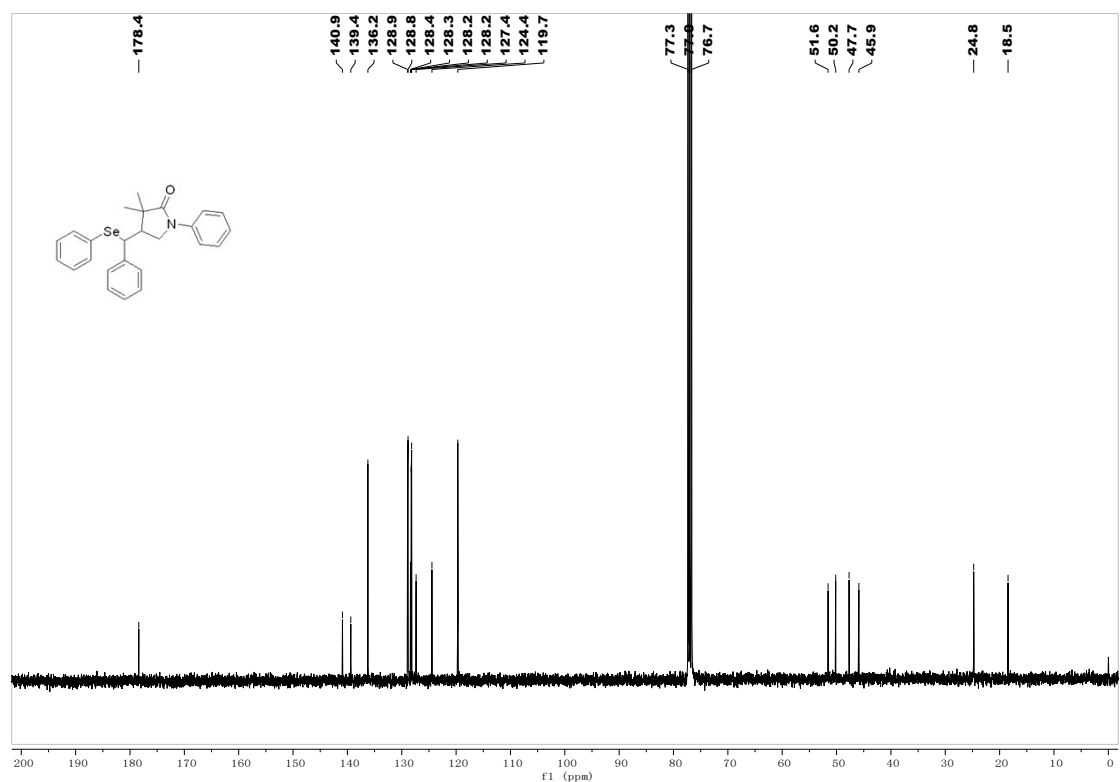

## 8. References

1. X. Ren, C. Shen, G. Wang, Z. Shi, X. Tian, and K. Dong, An Access to  $\alpha$ -Cyano Carbonyls Bearing a Quaternary Carbon Center by Reductive Cyanation, *Org. Lett.*, 2021, **23**, 2527-2532.
2. E. Tayama and S. Sugai, A Facile Method for the Stereoselective Preparation of (1E,3E)-4-Substituted-1-Amino-1,3-Dienes via 1,4-Elimination, *Tetrahedron Lett.*, 2007, **48**, 6163-6166.
3. J. Guin, S. D. Sarkar, S. Grimme and A. Studer, Biomimetic Carbene-Catalyzed Oxidations of Aldehydes by Using TEMPO as an Oxidant, *Angew. Chem. Int. Ed.* 2008, **47**, 8727–8730.
4. (a) Y. Gao, Y.-S. Quan, Z.-J. Li, L.-Y. Gao, Z.-H. Zhang, X. Zou, R. Yan, Y.-Y. Qu and K. Guo, Organocatalytic Three-Component 1,2-Cyanoalkylacylation of Alkenes via Radical Relay, *Org. Lett.* 2021, **23**, 183–189; (b) W.-D. Liu, W. Lee, H. Shu, C. Xiao, H. Xu, X. Chen, K. N. Houk, and J. Zhao, Diastereoselective Radical Aminoacylation of Olefins through N-Heterocyclic Carbene Catalysis, *J. Am. Chem. Soc.*, 2022, **144**, 22767–22777.
